# Supplementary material for: Differential RNA-seq, Multi-Network Analysis and Metabolic Regulation Analysis of Kluyveromyces marxianus Reveals a Compartmentalised Response to Xylose
Source: PubMed Central journal article supplement (PMC4912071; doi:10.1371/journal.pone.0156242), 2016-06-17
Supplement: pone.0156242.s009.pdf [file pone.0156242.s009.pdf]

|                                                             |                                                                 |                                                                           |                                                              |                                                         |                                                                           |
|-------------------------------------------------------------|-----------------------------------------------------------------|---------------------------------------------------------------------------|--------------------------------------------------------------|---------------------------------------------------------|---------------------------------------------------------------------------|
| central-extension3                                          | acetoacetate degradation (to acetyl CoA)                        | alanine biosynthesis II                                                   | superpathway of allantoin degradation in yeast               | superpathway of glutamate biosynthesis                  | glycolysis III                                                            |
| respiration (anaerobic)                                     | arginine degradation I (arginase pathway)                       | arginine degradation X (arginine monooxygenase pathway)                   | arginine degradation VI (arginase 2 pathway)                 | spermine biosynthesis                                   | arginine biosynthesis II (acetyl cycle)                                   |
| chorismate biosynthesis I                                   | asparagine biosynthesis I                                       | asparagine degradation I                                                  | aspartate biosynthesis                                       | lactose degradation III                                 | superpathway of leucine, valine, and isoleucine biosynthesis              |
| spermidine biosynthesis I                                   | citrulline degradation                                          | coenzyme A biosynthesis                                                   | superoxide radicals degradation                              | superpathway of ergosterol biosynthesis                 | fatty acid &beta;-oxidation I                                             |
| mixed acid fermentation                                     | superpathway of tetrahydrofolate biosynthesis and salvage       | glutamine biosynthesis I                                                  | gluconeogenesis I                                            | D-gluconate degradation                                 | glucose and glucose-1-phosphate degradation                               |
| glutamate biosynthesis IV                                   | glutamate degradation I                                         | glutamine degradation II                                                  | glutathione biosynthesis                                     | glutathione redox reactions II                          | glutamate biosynthesis III                                                |
| glutamate biosynthesis I                                    | glycine cleavage complex                                        | glycolysis I                                                              | glyoxylate cycle                                             | glycine biosynthesis III                                | glycine biosynthesis I                                                    |
| glycine biosynthesis IV                                     | heme biosynthesis from uroporphyrinogen-II                      | hexaprenyl diphosphate biosynthesis                                       | histidine biosynthesis                                       | homoserine biosynthesis                                 | threonine biosynthesis from homoserine                                    |
| isoleucine degradation I                                    | isoleucine biosynthesis I (from threonine)                      | L-cysteine degradation II                                                 | leucine biosynthesis                                         | triacylglycerol degradation                             | phospholipases                                                            |
| lysine biosynthesis IV                                      | aspartate degradation II                                        | D-mannose degradation                                                     | dolichyl-diphosphooligosaccharide biosynthesis               | methionine degradation I (to homocysteine)              | NAD salvage pathway II                                                    |
| pentose phosphate pathway (non-oxidative branch)            | pentose phosphate pathway (oxidative branch)                    | pentose phosphate pathway (partial)                                       | adenine and adenosine salvage I                              | phosphopantothenate biosynthesis I                      | pentose phosphate pathway                                                 |
| phenylalanine biosynthesis I                                | pyridoxal 5'-phosphate salvage pathway                          | proline biosynthesis I                                                    | 2-methylcitrate cycle I                                      | pyrimidine ribonucleotides de novo biosynthesis         | salvage pathways of pyrimidine ribonucleotides                            |
| pyrimidine deoxyribonucleotides de novo biosynthesis I      | glycerol degradation I                                          | lipote biosynthesis and incorporation I                                   | PRPP biosynthesis I                                          | alanine biosynthesis III                                | trehalose degradation II (trehalase)                                      |
| biotin-carboxyl carrier protein assembly                    | purine ribonucleosides degradation to ribose-1-phosphate        | glutamate dependent acid resistance                                       | acetate conversion to acetyl-CoA                             | biotin biosynthesis from 7-keto-8-aminopelargonic acid  | sphingosine and sphingosine-1-phosphate metabolism                        |
| ubiquinol-6 biosynthesis (eukaryotic)                       | glutamate degradation IX (via 4-aminobutyrate)                  | (R,R)-butanediol degradation                                              | phosphatidylcholine biosynthesis I                           | NAD salvage pathway III                                 | tyrosine degradation III                                                  |
| phosphatidylethanolamine biosynthesis II                    | phosphatidylglycerol biosynthesis II (non-plastidic)            | putrescine biosynthesis III                                               | cholesterol biosynthesis II (via 24,25-dihydrolanosterol)    | cholesterol biosynthesis III (via desmosterol)          | superpathway of cholesterol biosynthesis                                  |
| ethanol degradation II (cytosolic)                          | ethanol degradation IV (peroxisomal)                            | cholesterol biosynthesis I                                                | superpathway of glyoxylate cycle                             | homocysteine and cysteine interconversion               | superpathway of sulfur amino acid biosynthesis (Saccharomyces cerevisiae) |
| purine nucleotides de novo biosynthesis II                  | mevalonate pathway I                                            | formaldehyde oxidation V (tetrahydrofolate pathway)                       | folate polyglutamylation                                     | folate transformations I                                | plant sterol biosynthesis                                                 |
| fatty acid &omega;-oxidation                                | isoleucine biosynthesis I                                       | choline biosynthesis III                                                  | aerobic respiration -- electron donor II                     | folate transformations II (plants)                      | &gamma;-glutamyl cycle                                                    |
| glutathione-mediated detoxification                         | glutathione redox reactions I                                   | sorbitol degradation I                                                    | glycerol degradation IV                                      | DIMBOA-glucoside degradation                            | proline biosynthesis II (from arginine)                                   |
| <i>S</i>-adenosyl-L-methionine cycle II                     | valine degradation II (via 4-aminobutyrate)                     | glycogen biosynthesis II (from UDP-D-Glucose)                             | leucine degradation III                                      | isoleucine degradation II                               | phenylalanine degradation III                                             |
| very long chain fatty acid biosynthesis                     | tryptophan degradation VIII (to tryptophol)                     | methionine degradation III                                                | NAD/NADH phosphorylation and dephosphorylation               | 2-ketoglutarate dehydrogenase complex                   | geranylgeranyldiphosphate biosynthesis                                    |
| geranyl diphosphate biosynthesis                            | <i>trans, trans</i>-farnesyl diphosphate biosynthesis           | fatty acid &beta;-oxidation II (core pathway)                             | fatty acid activation                                        | acyl-CoA hydrolysis                                     | tetrapyrrole biosynthesis II                                              |
| siroheme biosynthesis                                       | cardiolipin biosynthesis II                                     | lysine degradation IX                                                     | sulfate activation for sulfonation                           | homocysteine biosynthesis                               | thiosulfate disproportionation III (rhodanese)                            |
| methylglyoxal degradation I                                 | methylthiopropionate biosynthesis                               | methylglyoxal degradation V                                               | pyruvate fermentation to ethanol II                          | GDP-mannose biosynthesis                                | CDP-diacylglycerol biosynthesis I                                         |
| phosphatidylethanolamine biosynthesis I                     | epoxysqualene biosynthesis                                      | uridine-5'-phosphate biosynthesis                                         | pyrimidine ribonucleotides interconversion                   | TCA cycle variation III (eukaryotic)                    | urate degradation to allantoin                                            |
| allantoin degradation to ureidoglycolate I (urea producing) | urea degradation I                                              | itaconate biosynthesis                                                    | phenylethanol biosynthesis                                   | &beta;-alanine biosynthesis IV                          | glycogen degradation III                                                  |
| ubiquinol-8 biosynthesis (eukaryotic)                       | 4-hydroxyphenylpyruvate biosynthesis                            | superpathway of geranylgeranyldiphosphate biosynthesis I (via mevalonate) | heme biosynthesis II                                         | L-glutamine biosynthesis II (tRNA-dependent)            | <i>R</i>-acetoin biosynthesis I                                           |
| glycogen degradation II                                     | <i>R,R</i>-butanediol biosynthesis                              | fatty acid biosynthesis initiation II                                     | fatty acids biosynthesis (yeast)                             | oleate biosynthesis II (animals)                        | &gamma;-linolenate biosynthesis II (animals)                              |
| acyl carrier protein metabolism                             | pseudouridine degradation                                       | zymosterol biosynthesis                                                   | ergosterol biosynthesis                                      | glycerol-3-phosphate shuttle                            | 5-aminoimidazole ribonucleotide biosynthesis I                            |
| 5-aminoimidazole ribonucleotide biosynthesis II             | inosine-5'-phosphate biosynthesis II                            | adenosine nucleotides de novo biosynthesis                                | dolichol and dolichyl phosphate biosynthesis                 | lanosterol biosynthesis                                 | 6-hydroxymethyl-dihydropterin diphosphate biosynthesis                    |
| <i>S</i>-adenosyl-L-methionine cycle I                      | 3-dehydroquinate biosynthesis I                                 | flavin biosynthesis III (fungi)                                           | superpathway of 5-aminoimidazole ribonucleotide biosynthesis | selenocysteine biosynthesis II (archaea and eukaryotes) | cysteine biosynthesis IV (fungi)                                          |
| galactose degradation I (Leilor pathway)                    | acetaldehyde biosynthesis II                                    | acetaldehyde biosynthesis I                                               | phosphate acquisition II                                     | D-myo-inositol (1,4,5)-trisphosphate biosynthesis       | 3-phosphoinositide biosynthesis                                           |
| phosphate regeneration in cell wall regeneration            | superpathway of D-myo-inositol (1,4,5)-trisphosphate metabolism | 1D-myo-inositol hexakisphosphate biosynthesis I (from Ins(1,4,5)P3)       | D-myo-inositol (1,4,5)-trisphosphate degradation             | D-myo-inositol (1,4,5)-trisphosphate biosynthesis       | <i>meso</i>-butanediol biosynthesis I                                     |
| <i>meso</i>-butanediol biosynthesis II                      | sitosterol biosynthesis                                         | 4-aminobutyrate degradation III                                           | p-aminobenzoate biosynthesis                                 | pyrimidine ribonucleosides degradation II               | adenine and adenosine salvage II                                          |
| guanosine nucleotides degradation II                        | superpathway of tetrahydrofolate biosynthesis                   | tetrahydrofolate salvage from 5,10-methylytetrahydrofolate                | tetrahydrofolate biosynthesis                                | adenine and adenosine salvage VI                        | superpathway of phenylalanine biosynthesis                                |
| superpathway of tryptophan biosynthesis                     | galactose degradation IV                                        | NAD salvage pathway I                                                     | acetyl-CoA biosynthesis (from pyruvate)                      | xanthine and xanthosine salvage                         | 5-adenosyl-L-methionine biosynthesis                                      |
| superpathway of serine and glycine biosynthesis I           | serine biosynthesis                                             | sulfate reduction I (assimilatory)                                        | sphingolipid metabolism                                      | thioredoxin pathway                                     | threonine biosynthesis                                                    |
| trehalose biosynthesis I                                    | triacylglycerol biosynthesis                                    | tRNA charging pathway                                                     | tryptophan biosynthesis                                      | UDP-N-acetyl-D-glucosamine biosynthesis II              | valine degradation I                                                      |
| valine biosynthesis                                         | xylose degradation I                                            |                                                                           |                                                              |                                                         |                                                                           |
