# Supplementary material for: Differential RNA-seq, Multi-Network Analysis and Metabolic Regulation Analysis of Kluyveromyces marxianus Reveals a Compartmentalised Response to Xylose
Source: PubMed Central journal article supplement (PMC4912071; doi:10.1371/journal.pone.0156242), 2016-06-17
Supplement: pone.0156242.s017.pdf [file pone.0156242.s017.pdf]

# **Supplementary Text to ‘Differential RNA-seq, Multi-Network Analysis and Metabolic Regulation Analysis of *Kluyveromyces marxianus* Reveals a Compartmentalized Response to Xylose’**

**Du Toit WP Schabort\***, Precious K Letebele, Laurinda Steyn, Stephanus G Kilian and James C du Preez  
Department of Microbial, Biochemical and Food Biotechnology, University of the Free State,  
Bloemfontein, South Africa

\*For correspondence: schabortdwp@ufs.ac.za

## *Gene set enrichment using the full Gene Ontology*

The enrichment scores of GO term gene sets are provided in supplementary file S2 Main Tables.

## *Sugar utilization*

Some interesting aspects arose from the data. Firstly, a variety of carbohydrate utilization genes were differentially expressed on glucose vs xylose, mostly for utilization of the hexose galactose, and the pentoses xylose and arabinose. Even though these alternative sugars were not present in the medium, their utilization pathways were up-regulated, a phenomenon typical of alleviation of glucose repression. Secondly, the capacity for hexose utilization by hexokinase was constitutive and high. Thirdly, the initial steps in galactose, xylose and arabinose utilization were more strongly up-regulated as compared to later steps in each pathway.

## *Extracellular enzymes*

Since *K. marxianus* seems to adopt an opportunistic metabolic gene set profile in response to the presence of xylose (or absence of glucose), the question arises whether extracellular hydrolases

possessing  $\beta$ -glucosidase activity, such as cellulases, would be activated, allowing *K. marxianus* to thrive on decaying plant matter. Cellulases are prevalent in fungi but not as prevalent in yeasts. The strain possesses fourteen genes annotated as having some form of  $\beta$ -glucosidase activity, most of which are secreted (supplementary Table 1 below). Beta-glucosidase (EC 3.2.1.21, cellobiase, gentiobiase) is a likely candidate that could function to hydrolyze cellobiose, the disaccharide found after hydrolysis by cellulose. It is 48.8-fold up-regulated and transcribed at a high level on xylose. It would be interesting to see whether this strain can grow on cellobiose, which is a trait uncommon to yeasts. Cellulose degradation is a complex process and requires the initial degradation of cellulose to cellobiose by cellulases. No cellulases were found in the genome, however. No genes were found to have xylanase activity or related terms either. Additional searches were performed for proteases, peptidases and lipases, which would be typical of opportunistic yeasts, especially pathogens. A number of proteases, peptidases and lipases were found, but none of them are clearly secreted proteins.

**Supplementary Table 1.** Enzymes with glucosidase and related activities.

| ID       | val(Glc) | val(Xyl) | log2(FC) | q     | sign | Entry  | Protein names                                       | Gene names                                | EC number             |
|----------|----------|----------|----------|-------|------|--------|-----------------------------------------------------|-------------------------------------------|-----------------------|
| g3519.t1 | 33.1     | 1601.0   | 5.6      | 0.001 | yes  | P07337 | Beta-glucosidase (Cellobiase)<br>(Gentiobiase)      |                                           | 3.2.1.21              |
| g3265.t1 | 135.8    | 347.4    | 1.4      | 0.016 | yes  | Q04951 | Probable family 17<br>glucosidase SCW10             | SCW10<br>YMR305C<br>YM9952.07C            | 3.2.1.-               |
| g3867.t1 | 262.7    | 582.8    | 1.1      | 0.047 | yes  | Q12628 | Glucan 1,3-beta-glucosidase<br>(EC 3.2.1.58)        | KLLA0C05324g                              | 3.2.1.58              |
| g4768.t1 | 841.6    | 1765.9   | 1.1      | 0.062 | no   | P53334 | Probable family 17<br>glucosidase SCW4              | SCW4 YGR279C                              | 3.2.1.-               |
| g3788.t1 | 922.9    | 1826.6   | 1.0      | 0.094 | no   | P15703 | Glucan 1,3-beta-glucosidase                         | BGL2 SCW9<br>YGR282C                      | 3.2.1.58              |
| g4569.t1 | 146.2    | 285.3    | 1.0      | 0.090 | no   | Q06625 | Glycogen debranching enzyme                         | GDB1 YPR184W                              | 2.4.1.25;<br>3.2.1.33 |
| g3018.t1 | 754.8    | 1235.7   | 0.7      | 0.262 | no   | P53616 | Probable secreted beta-<br>glucosidase SUN4         | SUN4 SCW3<br>YNL066W<br>N2411<br>YNL2411W | 3.2.1.-               |
| g2805.t1 | 25.3     | 39.4     | 0.6      | 0.430 | no   | P08019 | Glucoamylase, intracellular<br>sporulation-specific | SGA1 SGA<br>YIL099W                       | 3.2.1.3               |

|          |       |       |      |       |    |        |                                                         |                                    |           |
|----------|-------|-------|------|-------|----|--------|---------------------------------------------------------|------------------------------------|-----------|
| g1329.t1 | 48.5  | 69.2  | 0.5  | 0.491 | no | Q12168 | Endo-1,3(4)-beta-glucanase 2<br>(Laminarinase-2)        | ACF2 ENG2<br>PCA1 YLR144C<br>L3180 | 3.2.1.6   |
| g4202.t1 | 192.4 | 242.9 | 0.3  | 0.662 | no | P32486 | Beta-glucan synthesis-<br>associated protein KRE6       | KRE6 CWH48<br>YPR159W              |           |
| g2867.t1 | 136.4 | 148.0 | 0.1  | 0.904 | no | P53189 | Probable family 17<br>glucosidase SCW11                 | SCW11<br>YGL028C                   | 3.2.1.-   |
| g1495.t1 | 77.8  | 67.8  | -0.2 | 0.829 | no | P38138 | Glucosidase 2 subunit alpha                             | ROT2 GLS2<br>YBR229C<br>YBR1526    | 3.2.1.84  |
| g2866.t1 | 51.4  | 42.4  | -0.3 | 0.759 | no | P53008 | Mannosyl-oligosaccharide<br>glucosidase (Glucosidase I) | CWH41 GLS1<br>YGL027C              | 3.2.1.106 |
| g3564.t1 | 241.1 | 164.6 | -0.6 | 0.441 | no | P53753 | Endo-1,3(4)-beta-glucanase 1<br>(Laminarinase-1)        | DSE4 ENG1<br>YNR067C<br>N3547      | 3.2.1.6   |

### *Sexual reproduction and invasive growth*

Yeasts that reproduce sexually through mating have a pheromone sensing system whereby the haploid  $\alpha$ -cells secrete a pheromone, mating factor  $\alpha$ -1, which is sensed by the a-cells, a signal that suppresses DNA synthesis in the a-cells, thus synchronizing them with  $\alpha$ -cells for conjugation. Mating factor  $\alpha$ -1 (*MF(ALPHA)1*, *YPL187W*) was up-regulated 53-fold on xylose, whereas barrierpepsin (*BAR1*, *YILO15W*) was up-regulated 17-fold. Barrierpepsin likely cleaves mating factor  $\alpha$  and fine-tunes the concentration of the pheromone for optimal conjugation [1]. Similarly, protein *SST2* (*YLR452C*), which also responds to  $\alpha$ -pheromone to desensitize cells to  $\alpha$ -pheromone, was 3.3-fold down-regulated [2]. A functional interaction between cells during conjugation is made by agglutinins in response to pheromones, of which  $\alpha$ -agglutinin was up-regulated 5.7-fold. The flocculation proteins *FLO1* (*YAR050W*), *FLO11* (*YIRO19C*), and *FLO9* (*YAL063C*) were also up-regulated. They form functional interactions by causing cell aggregation in liquid culture and are known to be involved in the formation of diploid pseudohyphae, which play a role in the adhesion of cells to substrates, invasive growth by haploid cells (see [3] for a review). It was shown that *FLO11* is dominant in invasive growth whereas *FLO1* is dominant in flocculation, while they are both under the control of the transcription factor encoded by the *MSS1* gene [3]. In summary, both sexual reproduction was up-regulated as well as a variety of genes involved with morphological changes that may be beneficial for penetration into a solid substrate. We observed only

few pseudohyphae on xylose towards the stationary phase and none on glucose, indicating that the response is not manifested completely as a phenotype under these conditions, but likely further stimuli are needed to make a transition to invasive growth.

## References

1. MacKay V, Welch SK, Insley MY, Manney TR, Holly J, Saari GC, et al. The *Saccharomyces cerevisiae* BAR1 gene encodes an exported protein with homology to pepsin. Proc. Natl. Acad. Sci. USA. 1988;85: 55-59.
2. Apanovitch DM, Slep KC, Sigler PB, Dohlman HG. Sst2 Is a GTPase-activating protein for Gpa1: Purification and characterization of a cognate RGS-Gα protein pair in yeast. Biochemistry. 1998;37(14): 4815-4822.
3. Bester MC, Pretorius IS, Bauer FF. The regulation of *Saccharomyces cerevisiae* FLO gene expression and Ca<sup>2+</sup>-dependent flocculation by Flo8p and Mss11p. Curr. Genet. 2006;49: 375-383.
