# Supplementary material for: Differential RNA-seq, Multi-Network Analysis and Metabolic Regulation Analysis of Kluyveromyces marxianus Reveals a Compartmentalised Response to Xylose
Source: PLoS One. 2016 Jun 17;11(6):e0156242. doi: 10.1371/journal.pone.0156242 (PMC4912071; doi:10.1371/journal.pone.0156242)
Supplement: S4 Table — (XLSX) [file pone.0156242.s015.xlsx]

## Sheet: Enrichment Statistics
GO_slim biological_process								Full GO
GO ID	GO name	Z(0)	K	nNo	nDown	nUp		Z(0)	K	nNo	nDown	nUp
GO:0008643	carbohydrate transport	7.42	51	29	5	17		8.21622	64	36	7	21	*The full GO ontology was used for interpretation of 'carbohydrate transport', mapping to 64 genes, giving and enrichment statistic of 8.22, whereas the Go_slim mapped to a gene set of 51 genes, with an enrichment score of 7.42
GO:0055085	transmembrane transport	4.03	73	52	12	9
GO:0007031	peroxisome organization	3.54	14	8	0	6
GO:0006865	amino acid transport	2.13	11	8	1	2		4.88223	48	32	11	5	*The full GO ontology was used for interpretation of 'amino acid transport', mapping to 48 genes, giving and enrichment statistic of 4.48, whereas the GO_slim mapped to a gene set of 11 genes, with an enrichment score of 1.962.13
GO:0006811	ion transport	1.96	28	21	2	5
GO:0016570	histone modification	1.82	1	0	1	0							*Only one gene in this gene set, thus enrihment is iggnored
GO:0005975	carbohydrate metabolic process	1.77	62	51	1	10
GO:0051603	proteolysis involved in cellular protein catabolic process	1.72	4	2	0	2							*Only four genes in this gene set, thus enrihment is ignored
GO:0007124	pseudohyphal growth	1.49	36	30	3	3
GO:0006979	response to oxidative stress	1.19	8	6	0	2
GO:0001403	invasive growth in response to glucose limitation	0.76	26	22	1	3
GO:0006629	lipid metabolic process	0.54	9	7	2	0
GO:0006352	DNA-templated transcription, initiation	0.44	3	2	1	0
GO:0006869	lipid transport	0.37	6	4	0	2
GO:0048193	Golgi vesicle transport	0.29	3	3	0	0
GO:0006325	chromatin organization	0.13	10	8	1	1

## Sheet: GO_carbohydrate transport
test_id	gene_id	gene	locus	sample_1	sample_2	status	value_1	value_2	log2(fold_change)	test_stat	p_value	q_value	significant	gene	Entry	Entry name	Status	Protein names	Gene names	Organism	Length	Gene names (primary )	Gene names (synonym )	Gene names (ordered locus )	Gene names (ORF )	EC number	Subcellular location [CC]	Intramembrane	Topological domain	Transmembrane	Gene ontology (GO)	Gene ontology (biological process)	Gene ontology (molecular function)	Gene ontology (cellular component)	Gene ontology IDs	Domain [CC]	Domain [FT]	Motif	Zinc finger	DNA binding	Pathway	Function [CC]	Enzyme regulation	Annotation	Post-translational modification	Cross-reference (BioGrid)	Cross-reference (DIP)	Cross-reference (IntAct)	Cross-reference (MINT)
g1498.t1	GK5S-3517	-	1575:0-204	GLC	XYL	OK	4.63918	9721.97	11.0332	14.5065	0.2429	0.537839	no	g1498.t1	P49374	HGT1_KLULA	reviewed	High-affinity glucose transporter	HGT1 KLLA0A11110g	Kluyveromyces lactis (strain ATCC 8585 / CBS 2359 / DSM 70799 / NBRC 1267 / NRRL Y-1140 / WM37) (Yeast) (Candida sphaerica)	551	HGT1		KLLA0A11110g			SUBCELLULAR LOCATION: Membrane; Multi-pass membrane protein.		TOPO_DOM 1 27 Cytoplasmic. {ECO:0000255}.; TOPO_DOM 49 70 Extracellular. {ECO:0000255}.; TOPO_DOM 92 98 Cytoplasmic. {ECO:0000255}.; TOPO_DOM 120 123 Extracellular. {ECO:0000255}.; TOPO_DOM 145 155 Cytoplasmic. {ECO:0000255}.; TOPO_DOM 177 190 Extracellular. {ECO:0000255}.; TOPO_DOM 212 289 Cytoplasmic. {ECO:0000255}.; TOPO_DOM 311 315 Extracellular. {ECO:0000255}.; TOPO_DOM 337 343 Cytoplasmic. …	TRANSMEM 28 48 Helical; Name=1. {ECO:0000255}.; TRANSMEM 71 91 Helical; Name=2. {ECO:0000255}.; TRANSMEM 99 119 Helical; Name=3. {ECO:0000255}.; TRANSMEM 124 144 Helical; Name=4. {ECO:0000255}.; TRANSMEM 156 176 Helical; Name=5. {ECO:0000255}.; TRANSMEM 191 211 Helical; Name=6. {ECO:0000255}.; TRANSMEM 290 310 Helical; Name=7. {ECO:0000255}.; TRANSMEM 316 336 Helical; Name=8. {ECO:0000255}.; TRAN…	integral component of membrane [GO:0016021]; substrate-specific transmembrane transporter activity [GO:0022891]; carbohydrate transport [GO:0008643]	carbohydrate transport [GO:0008643]	substrate-specific transmembrane transporter activity [GO:0022891]	integral component of membrane [GO:0016021]	GO:0008643; GO:0016021; GO:0022891							FUNCTION: High-affinity glucose transporter.		2 out of 5
g262.t1	GK5S-4768	-	259:0-231	GLC	XYL	OK	10.2427	13941	10.4105	19.4136	0.07255	0.27628	no	g262.t1	P49374	HGT1_KLULA	reviewed	High-affinity glucose transporter	HGT1 KLLA0A11110g	Kluyveromyces lactis (strain ATCC 8585 / CBS 2359 / DSM 70799 / NBRC 1267 / NRRL Y-1140 / WM37) (Yeast) (Candida sphaerica)	551	HGT1		KLLA0A11110g			SUBCELLULAR LOCATION: Membrane; Multi-pass membrane protein.		TOPO_DOM 1 27 Cytoplasmic. {ECO:0000255}.; TOPO_DOM 49 70 Extracellular. {ECO:0000255}.; TOPO_DOM 92 98 Cytoplasmic. {ECO:0000255}.; TOPO_DOM 120 123 Extracellular. {ECO:0000255}.; TOPO_DOM 145 155 Cytoplasmic. {ECO:0000255}.; TOPO_DOM 177 190 Extracellular. {ECO:0000255}.; TOPO_DOM 212 289 Cytoplasmic. {ECO:0000255}.; TOPO_DOM 311 315 Extracellular. {ECO:0000255}.; TOPO_DOM 337 343 Cytoplasmic. …	TRANSMEM 28 48 Helical; Name=1. {ECO:0000255}.; TRANSMEM 71 91 Helical; Name=2. {ECO:0000255}.; TRANSMEM 99 119 Helical; Name=3. {ECO:0000255}.; TRANSMEM 124 144 Helical; Name=4. {ECO:0000255}.; TRANSMEM 156 176 Helical; Name=5. {ECO:0000255}.; TRANSMEM 191 211 Helical; Name=6. {ECO:0000255}.; TRANSMEM 290 310 Helical; Name=7. {ECO:0000255}.; TRANSMEM 316 336 Helical; Name=8. {ECO:0000255}.; TRAN…	integral component of membrane [GO:0016021]; substrate-specific transmembrane transporter activity [GO:0022891]; carbohydrate transport [GO:0008643]	carbohydrate transport [GO:0008643]	substrate-specific transmembrane transporter activity [GO:0022891]	integral component of membrane [GO:0016021]	GO:0008643; GO:0016021; GO:0022891							FUNCTION: High-affinity glucose transporter.		2 out of 5
g2526.t1	GK5S-2459	-	2477:0-893	GLC	XYL	OK	7.43367	9233.02	10.2785	13.5818	5e-05	0.00100773	yes	g2526.t1	P49374	HGT1_KLULA	reviewed	High-affinity glucose transporter	HGT1 KLLA0A11110g	Kluyveromyces lactis (strain ATCC 8585 / CBS 2359 / DSM 70799 / NBRC 1267 / NRRL Y-1140 / WM37) (Yeast) (Candida sphaerica)	551	HGT1		KLLA0A11110g			SUBCELLULAR LOCATION: Membrane; Multi-pass membrane protein.		TOPO_DOM 1 27 Cytoplasmic. {ECO:0000255}.; TOPO_DOM 49 70 Extracellular. {ECO:0000255}.; TOPO_DOM 92 98 Cytoplasmic. {ECO:0000255}.; TOPO_DOM 120 123 Extracellular. {ECO:0000255}.; TOPO_DOM 145 155 Cytoplasmic. {ECO:0000255}.; TOPO_DOM 177 190 Extracellular. {ECO:0000255}.; TOPO_DOM 212 289 Cytoplasmic. {ECO:0000255}.; TOPO_DOM 311 315 Extracellular. {ECO:0000255}.; TOPO_DOM 337 343 Cytoplasmic. …	TRANSMEM 28 48 Helical; Name=1. {ECO:0000255}.; TRANSMEM 71 91 Helical; Name=2. {ECO:0000255}.; TRANSMEM 99 119 Helical; Name=3. {ECO:0000255}.; TRANSMEM 124 144 Helical; Name=4. {ECO:0000255}.; TRANSMEM 156 176 Helical; Name=5. {ECO:0000255}.; TRANSMEM 191 211 Helical; Name=6. {ECO:0000255}.; TRANSMEM 290 310 Helical; Name=7. {ECO:0000255}.; TRANSMEM 316 336 Helical; Name=8. {ECO:0000255}.; TRAN…	integral component of membrane [GO:0016021]; substrate-specific transmembrane transporter activity [GO:0022891]; carbohydrate transport [GO:0008643]	carbohydrate transport [GO:0008643]	substrate-specific transmembrane transporter activity [GO:0022891]	integral component of membrane [GO:0016021]	GO:0008643; GO:0016021; GO:0022891							FUNCTION: High-affinity glucose transporter.		2 out of 5
g915.t1	GK5S-4107	-	990:29-390	GLC	XYL	OK	14.2908	11675.6	9.67419	16.797	0.0007	0.00931218	yes	g915.t1	P49374	HGT1_KLULA	reviewed	High-affinity glucose transporter	HGT1 KLLA0A11110g	Kluyveromyces lactis (strain ATCC 8585 / CBS 2359 / DSM 70799 / NBRC 1267 / NRRL Y-1140 / WM37) (Yeast) (Candida sphaerica)	551	HGT1		KLLA0A11110g			SUBCELLULAR LOCATION: Membrane; Multi-pass membrane protein.		TOPO_DOM 1 27 Cytoplasmic. {ECO:0000255}.; TOPO_DOM 49 70 Extracellular. {ECO:0000255}.; TOPO_DOM 92 98 Cytoplasmic. {ECO:0000255}.; TOPO_DOM 120 123 Extracellular. {ECO:0000255}.; TOPO_DOM 145 155 Cytoplasmic. {ECO:0000255}.; TOPO_DOM 177 190 Extracellular. {ECO:0000255}.; TOPO_DOM 212 289 Cytoplasmic. {ECO:0000255}.; TOPO_DOM 311 315 Extracellular. {ECO:0000255}.; TOPO_DOM 337 343 Cytoplasmic. …	TRANSMEM 28 48 Helical; Name=1. {ECO:0000255}.; TRANSMEM 71 91 Helical; Name=2. {ECO:0000255}.; TRANSMEM 99 119 Helical; Name=3. {ECO:0000255}.; TRANSMEM 124 144 Helical; Name=4. {ECO:0000255}.; TRANSMEM 156 176 Helical; Name=5. {ECO:0000255}.; TRANSMEM 191 211 Helical; Name=6. {ECO:0000255}.; TRANSMEM 290 310 Helical; Name=7. {ECO:0000255}.; TRANSMEM 316 336 Helical; Name=8. {ECO:0000255}.; TRAN…	integral component of membrane [GO:0016021]; substrate-specific transmembrane transporter activity [GO:0022891]; carbohydrate transport [GO:0008643]	carbohydrate transport [GO:0008643]	substrate-specific transmembrane transporter activity [GO:0022891]	integral component of membrane [GO:0016021]	GO:0008643; GO:0016021; GO:0022891							FUNCTION: High-affinity glucose transporter.		2 out of 5
g536.t1	GK5S-4485	-	596:0-1140	GLC	XYL	OK	20.015	2055.81	6.68248	10.9067	5e-05	0.00100773	yes	g536.t1	P49374	HGT1_KLULA	reviewed	High-affinity glucose transporter	HGT1 KLLA0A11110g	Kluyveromyces lactis (strain ATCC 8585 / CBS 2359 / DSM 70799 / NBRC 1267 / NRRL Y-1140 / WM37) (Yeast) (Candida sphaerica)	551	HGT1		KLLA0A11110g			SUBCELLULAR LOCATION: Membrane; Multi-pass membrane protein.		TOPO_DOM 1 27 Cytoplasmic. {ECO:0000255}.; TOPO_DOM 49 70 Extracellular. {ECO:0000255}.; TOPO_DOM 92 98 Cytoplasmic. {ECO:0000255}.; TOPO_DOM 120 123 Extracellular. {ECO:0000255}.; TOPO_DOM 145 155 Cytoplasmic. {ECO:0000255}.; TOPO_DOM 177 190 Extracellular. {ECO:0000255}.; TOPO_DOM 212 289 Cytoplasmic. {ECO:0000255}.; TOPO_DOM 311 315 Extracellular. {ECO:0000255}.; TOPO_DOM 337 343 Cytoplasmic. …	TRANSMEM 28 48 Helical; Name=1. {ECO:0000255}.; TRANSMEM 71 91 Helical; Name=2. {ECO:0000255}.; TRANSMEM 99 119 Helical; Name=3. {ECO:0000255}.; TRANSMEM 124 144 Helical; Name=4. {ECO:0000255}.; TRANSMEM 156 176 Helical; Name=5. {ECO:0000255}.; TRANSMEM 191 211 Helical; Name=6. {ECO:0000255}.; TRANSMEM 290 310 Helical; Name=7. {ECO:0000255}.; TRANSMEM 316 336 Helical; Name=8. {ECO:0000255}.; TRAN…	integral component of membrane [GO:0016021]; substrate-specific transmembrane transporter activity [GO:0022891]; carbohydrate transport [GO:0008643]	carbohydrate transport [GO:0008643]	substrate-specific transmembrane transporter activity [GO:0022891]	integral component of membrane [GO:0016021]	GO:0008643; GO:0016021; GO:0022891							FUNCTION: High-affinity glucose transporter.		2 out of 5
g2963.t1	GK5S-2016	-	2839:0-461	GLC	XYL	OK	23.4203	1961.5	6.38805	12.5103	5e-05	0.00100773	yes	g2963.t1	P49374	HGT1_KLULA	reviewed	High-affinity glucose transporter	HGT1 KLLA0A11110g	Kluyveromyces lactis (strain ATCC 8585 / CBS 2359 / DSM 70799 / NBRC 1267 / NRRL Y-1140 / WM37) (Yeast) (Candida sphaerica)	551	HGT1		KLLA0A11110g			SUBCELLULAR LOCATION: Membrane; Multi-pass membrane protein.		TOPO_DOM 1 27 Cytoplasmic. {ECO:0000255}.; TOPO_DOM 49 70 Extracellular. {ECO:0000255}.; TOPO_DOM 92 98 Cytoplasmic. {ECO:0000255}.; TOPO_DOM 120 123 Extracellular. {ECO:0000255}.; TOPO_DOM 145 155 Cytoplasmic. {ECO:0000255}.; TOPO_DOM 177 190 Extracellular. {ECO:0000255}.; TOPO_DOM 212 289 Cytoplasmic. {ECO:0000255}.; TOPO_DOM 311 315 Extracellular. {ECO:0000255}.; TOPO_DOM 337 343 Cytoplasmic. …	TRANSMEM 28 48 Helical; Name=1. {ECO:0000255}.; TRANSMEM 71 91 Helical; Name=2. {ECO:0000255}.; TRANSMEM 99 119 Helical; Name=3. {ECO:0000255}.; TRANSMEM 124 144 Helical; Name=4. {ECO:0000255}.; TRANSMEM 156 176 Helical; Name=5. {ECO:0000255}.; TRANSMEM 191 211 Helical; Name=6. {ECO:0000255}.; TRANSMEM 290 310 Helical; Name=7. {ECO:0000255}.; TRANSMEM 316 336 Helical; Name=8. {ECO:0000255}.; TRAN…	integral component of membrane [GO:0016021]; substrate-specific transmembrane transporter activity [GO:0022891]; carbohydrate transport [GO:0008643]	carbohydrate transport [GO:0008643]	substrate-specific transmembrane transporter activity [GO:0022891]	integral component of membrane [GO:0016021]	GO:0008643; GO:0016021; GO:0022891							FUNCTION: High-affinity glucose transporter.		2 out of 5
g3665.t1	GK5S-1311	-	3467:0-234	GLC	XYL	OK	16.2806	1196.35	6.19933	14.1043	0.0209	0.119837	no	g3665.t1	P49374	HGT1_KLULA	reviewed	High-affinity glucose transporter	HGT1 KLLA0A11110g	Kluyveromyces lactis (strain ATCC 8585 / CBS 2359 / DSM 70799 / NBRC 1267 / NRRL Y-1140 / WM37) (Yeast) (Candida sphaerica)	551	HGT1		KLLA0A11110g			SUBCELLULAR LOCATION: Membrane; Multi-pass membrane protein.		TOPO_DOM 1 27 Cytoplasmic. {ECO:0000255}.; TOPO_DOM 49 70 Extracellular. {ECO:0000255}.; TOPO_DOM 92 98 Cytoplasmic. {ECO:0000255}.; TOPO_DOM 120 123 Extracellular. {ECO:0000255}.; TOPO_DOM 145 155 Cytoplasmic. {ECO:0000255}.; TOPO_DOM 177 190 Extracellular. {ECO:0000255}.; TOPO_DOM 212 289 Cytoplasmic. {ECO:0000255}.; TOPO_DOM 311 315 Extracellular. {ECO:0000255}.; TOPO_DOM 337 343 Cytoplasmic. …	TRANSMEM 28 48 Helical; Name=1. {ECO:0000255}.; TRANSMEM 71 91 Helical; Name=2. {ECO:0000255}.; TRANSMEM 99 119 Helical; Name=3. {ECO:0000255}.; TRANSMEM 124 144 Helical; Name=4. {ECO:0000255}.; TRANSMEM 156 176 Helical; Name=5. {ECO:0000255}.; TRANSMEM 191 211 Helical; Name=6. {ECO:0000255}.; TRANSMEM 290 310 Helical; Name=7. {ECO:0000255}.; TRANSMEM 316 336 Helical; Name=8. {ECO:0000255}.; TRAN…	integral component of membrane [GO:0016021]; substrate-specific transmembrane transporter activity [GO:0022891]; carbohydrate transport [GO:0008643]	carbohydrate transport [GO:0008643]	substrate-specific transmembrane transporter activity [GO:0022891]	integral component of membrane [GO:0016021]	GO:0008643; GO:0016021; GO:0022891							FUNCTION: High-affinity glucose transporter.		2 out of 5
g4443.t1	GK5S-526	-	4418:0-231	GLC	XYL	OK	3.29652	143.166	5.44061	5.69112	0.2429	0.537839	no	g4443.t1	P18631	RAG1_KLULA	reviewed	Low-affinity glucose transporter (Hexose transporter 1)	RAG1 KHT1 KLLA0D13310g	Kluyveromyces lactis (strain ATCC 8585 / CBS 2359 / DSM 70799 / NBRC 1267 / NRRL Y-1140 / WM37) (Yeast) (Candida sphaerica)	567	RAG1	KHT1	KLLA0D13310g			SUBCELLULAR LOCATION: Membrane; Multi-pass membrane protein.		TOPO_DOM 18 62 Cytoplasmic. {ECO:0000255}.; TOPO_DOM 84 113 Extracellular. {ECO:0000255}.; TOPO_DOM 135 141 Cytoplasmic. {ECO:0000255}.; TOPO_DOM 163 167 Extracellular. {ECO:0000255}.; TOPO_DOM 189 199 Cytoplasmic. {ECO:0000255}.; TOPO_DOM 221 234 Extracellular. {ECO:0000255}.; TOPO_DOM 256 334 Cytoplasmic. {ECO:0000255}.; TOPO_DOM 355 358 Extracellular. {ECO:0000255}.; TOPO_DOM 380 386 Cytoplasm…	TRANSMEM 63 83 Helical; Name=1. {ECO:0000255}.; TRANSMEM 114 134 Helical; Name=2. {ECO:0000255}.; TRANSMEM 142 162 Helical; Name=3. {ECO:0000255}.; TRANSMEM 168 188 Helical; Name=4. {ECO:0000255}.; TRANSMEM 200 220 Helical; Name=5. {ECO:0000255}.; TRANSMEM 235 255 Helical; Name=6. {ECO:0000255}.; TRANSMEM 335 354 Helical; Name=7. {ECO:0000255}.; TRANSMEM 359 379 Helical; Name=8. {ECO:0000255}.; T…	integral component of membrane [GO:0016021]; substrate-specific transmembrane transporter activity [GO:0022891]; carbohydrate transport [GO:0008643]	carbohydrate transport [GO:0008643]	substrate-specific transmembrane transporter activity [GO:0022891]	integral component of membrane [GO:0016021]	GO:0008643; GO:0016021; GO:0022891							FUNCTION: Low-affinity glucose transporter.		3 out of 5
g4435.t1	GK5S-534	-	4411:0-235	GLC	XYL	OK	23.0623	854.481	5.21144	13.8817	0.0046	0.0400772	yes	g4435.t1	P49374	HGT1_KLULA	reviewed	High-affinity glucose transporter	HGT1 KLLA0A11110g	Kluyveromyces lactis (strain ATCC 8585 / CBS 2359 / DSM 70799 / NBRC 1267 / NRRL Y-1140 / WM37) (Yeast) (Candida sphaerica)	551	HGT1		KLLA0A11110g			SUBCELLULAR LOCATION: Membrane; Multi-pass membrane protein.		TOPO_DOM 1 27 Cytoplasmic. {ECO:0000255}.; TOPO_DOM 49 70 Extracellular. {ECO:0000255}.; TOPO_DOM 92 98 Cytoplasmic. {ECO:0000255}.; TOPO_DOM 120 123 Extracellular. {ECO:0000255}.; TOPO_DOM 145 155 Cytoplasmic. {ECO:0000255}.; TOPO_DOM 177 190 Extracellular. {ECO:0000255}.; TOPO_DOM 212 289 Cytoplasmic. {ECO:0000255}.; TOPO_DOM 311 315 Extracellular. {ECO:0000255}.; TOPO_DOM 337 343 Cytoplasmic. …	TRANSMEM 28 48 Helical; Name=1. {ECO:0000255}.; TRANSMEM 71 91 Helical; Name=2. {ECO:0000255}.; TRANSMEM 99 119 Helical; Name=3. {ECO:0000255}.; TRANSMEM 124 144 Helical; Name=4. {ECO:0000255}.; TRANSMEM 156 176 Helical; Name=5. {ECO:0000255}.; TRANSMEM 191 211 Helical; Name=6. {ECO:0000255}.; TRANSMEM 290 310 Helical; Name=7. {ECO:0000255}.; TRANSMEM 316 336 Helical; Name=8. {ECO:0000255}.; TRAN…	integral component of membrane [GO:0016021]; substrate-specific transmembrane transporter activity [GO:0022891]; carbohydrate transport [GO:0008643]	carbohydrate transport [GO:0008643]	substrate-specific transmembrane transporter activity [GO:0022891]	integral component of membrane [GO:0016021]	GO:0008643; GO:0016021; GO:0022891							FUNCTION: High-affinity glucose transporter.		2 out of 5
g2424.t1	GK5S-2571	-	2366:0-200	GLC	XYL	OK	15.5043	549.587	5.14761	12.4584	0.07255	0.27628	no	g2424.t1	P49374	HGT1_KLULA	reviewed	High-affinity glucose transporter	HGT1 KLLA0A11110g	Kluyveromyces lactis (strain ATCC 8585 / CBS 2359 / DSM 70799 / NBRC 1267 / NRRL Y-1140 / WM37) (Yeast) (Candida sphaerica)	551	HGT1		KLLA0A11110g			SUBCELLULAR LOCATION: Membrane; Multi-pass membrane protein.		TOPO_DOM 1 27 Cytoplasmic. {ECO:0000255}.; TOPO_DOM 49 70 Extracellular. {ECO:0000255}.; TOPO_DOM 92 98 Cytoplasmic. {ECO:0000255}.; TOPO_DOM 120 123 Extracellular. {ECO:0000255}.; TOPO_DOM 145 155 Cytoplasmic. {ECO:0000255}.; TOPO_DOM 177 190 Extracellular. {ECO:0000255}.; TOPO_DOM 212 289 Cytoplasmic. {ECO:0000255}.; TOPO_DOM 311 315 Extracellular. {ECO:0000255}.; TOPO_DOM 337 343 Cytoplasmic. …	TRANSMEM 28 48 Helical; Name=1. {ECO:0000255}.; TRANSMEM 71 91 Helical; Name=2. {ECO:0000255}.; TRANSMEM 99 119 Helical; Name=3. {ECO:0000255}.; TRANSMEM 124 144 Helical; Name=4. {ECO:0000255}.; TRANSMEM 156 176 Helical; Name=5. {ECO:0000255}.; TRANSMEM 191 211 Helical; Name=6. {ECO:0000255}.; TRANSMEM 290 310 Helical; Name=7. {ECO:0000255}.; TRANSMEM 316 336 Helical; Name=8. {ECO:0000255}.; TRAN…	integral component of membrane [GO:0016021]; substrate-specific transmembrane transporter activity [GO:0022891]; carbohydrate transport [GO:0008643]	carbohydrate transport [GO:0008643]	substrate-specific transmembrane transporter activity [GO:0022891]	integral component of membrane [GO:0016021]	GO:0008643; GO:0016021; GO:0022891							FUNCTION: High-affinity glucose transporter.		2 out of 5
g1665.t1	GK5S-3346	-	1730:0-210	GLC	XYL	OK	13.3691	410.154	4.9392	10.7875	0.07255	0.27628	no	g1665.t1	P53387	KHT2_KLULC	reviewed	Hexose transporter 2	KHT2	Kluyveromyces lactis (Yeast) (Candida sphaerica)	566	KHT2					SUBCELLULAR LOCATION: Membrane; Multi-pass membrane protein.		TOPO_DOM 22 61 Cytoplasmic. {ECO:0000255}.; TOPO_DOM 83 112 Extracellular. {ECO:0000255}.; TOPO_DOM 134 140 Cytoplasmic. {ECO:0000255}.; TOPO_DOM 162 166 Extracellular. {ECO:0000255}.; TOPO_DOM 188 198 Cytoplasmic. {ECO:0000255}.; TOPO_DOM 220 233 Extracellular. {ECO:0000255}.; TOPO_DOM 255 333 Cytoplasmic. {ECO:0000255}.; TOPO_DOM 354 357 Extracellular. {ECO:0000255}.; TOPO_DOM 379 385 Cytoplasm…	TRANSMEM 62 82 Helical; Name=1. {ECO:0000255}.; TRANSMEM 113 133 Helical; Name=2. {ECO:0000255}.; TRANSMEM 141 161 Helical; Name=3. {ECO:0000255}.; TRANSMEM 167 187 Helical; Name=4. {ECO:0000255}.; TRANSMEM 199 219 Helical; Name=5. {ECO:0000255}.; TRANSMEM 234 254 Helical; Name=6. {ECO:0000255}.; TRANSMEM 334 353 Helical; Name=7. {ECO:0000255}.; TRANSMEM 358 378 Helical; Name=8. {ECO:0000255}.; T…	integral component of membrane [GO:0016021]; substrate-specific transmembrane transporter activity [GO:0022891]; carbohydrate transport [GO:0008643]	carbohydrate transport [GO:0008643]	substrate-specific transmembrane transporter activity [GO:0022891]	integral component of membrane [GO:0016021]	GO:0008643; GO:0016021; GO:0022891							FUNCTION: Probable glucose transporter.		2 out of 5
g4216.t1	GK5S-753	-	4161:0-170	GLC	XYL	OK	16.9746	508.365	4.90441	13.672	0.156	0.42666	no	g4216.t1	P49374	HGT1_KLULA	reviewed	High-affinity glucose transporter	HGT1 KLLA0A11110g	Kluyveromyces lactis (strain ATCC 8585 / CBS 2359 / DSM 70799 / NBRC 1267 / NRRL Y-1140 / WM37) (Yeast) (Candida sphaerica)	551	HGT1		KLLA0A11110g			SUBCELLULAR LOCATION: Membrane; Multi-pass membrane protein.		TOPO_DOM 1 27 Cytoplasmic. {ECO:0000255}.; TOPO_DOM 49 70 Extracellular. {ECO:0000255}.; TOPO_DOM 92 98 Cytoplasmic. {ECO:0000255}.; TOPO_DOM 120 123 Extracellular. {ECO:0000255}.; TOPO_DOM 145 155 Cytoplasmic. {ECO:0000255}.; TOPO_DOM 177 190 Extracellular. {ECO:0000255}.; TOPO_DOM 212 289 Cytoplasmic. {ECO:0000255}.; TOPO_DOM 311 315 Extracellular. {ECO:0000255}.; TOPO_DOM 337 343 Cytoplasmic. …	TRANSMEM 28 48 Helical; Name=1. {ECO:0000255}.; TRANSMEM 71 91 Helical; Name=2. {ECO:0000255}.; TRANSMEM 99 119 Helical; Name=3. {ECO:0000255}.; TRANSMEM 124 144 Helical; Name=4. {ECO:0000255}.; TRANSMEM 156 176 Helical; Name=5. {ECO:0000255}.; TRANSMEM 191 211 Helical; Name=6. {ECO:0000255}.; TRANSMEM 290 310 Helical; Name=7. {ECO:0000255}.; TRANSMEM 316 336 Helical; Name=8. {ECO:0000255}.; TRAN…	integral component of membrane [GO:0016021]; substrate-specific transmembrane transporter activity [GO:0022891]; carbohydrate transport [GO:0008643]	carbohydrate transport [GO:0008643]	substrate-specific transmembrane transporter activity [GO:0022891]	integral component of membrane [GO:0016021]	GO:0008643; GO:0016021; GO:0022891							FUNCTION: High-affinity glucose transporter.		2 out of 5
g2210.t1	GK5S-2793	-	2212:0-533	GLC	XYL	OK	9.7943	273.79	4.80499	7.1932	0.0001	0.00179923	yes	g2210.t1	P18631	RAG1_KLULA	reviewed	Low-affinity glucose transporter (Hexose transporter 1)	RAG1 KHT1 KLLA0D13310g	Kluyveromyces lactis (strain ATCC 8585 / CBS 2359 / DSM 70799 / NBRC 1267 / NRRL Y-1140 / WM37) (Yeast) (Candida sphaerica)	567	RAG1	KHT1	KLLA0D13310g			SUBCELLULAR LOCATION: Membrane; Multi-pass membrane protein.		TOPO_DOM 18 62 Cytoplasmic. {ECO:0000255}.; TOPO_DOM 84 113 Extracellular. {ECO:0000255}.; TOPO_DOM 135 141 Cytoplasmic. {ECO:0000255}.; TOPO_DOM 163 167 Extracellular. {ECO:0000255}.; TOPO_DOM 189 199 Cytoplasmic. {ECO:0000255}.; TOPO_DOM 221 234 Extracellular. {ECO:0000255}.; TOPO_DOM 256 334 Cytoplasmic. {ECO:0000255}.; TOPO_DOM 355 358 Extracellular. {ECO:0000255}.; TOPO_DOM 380 386 Cytoplasm…	TRANSMEM 63 83 Helical; Name=1. {ECO:0000255}.; TRANSMEM 114 134 Helical; Name=2. {ECO:0000255}.; TRANSMEM 142 162 Helical; Name=3. {ECO:0000255}.; TRANSMEM 168 188 Helical; Name=4. {ECO:0000255}.; TRANSMEM 200 220 Helical; Name=5. {ECO:0000255}.; TRANSMEM 235 255 Helical; Name=6. {ECO:0000255}.; TRANSMEM 335 354 Helical; Name=7. {ECO:0000255}.; TRANSMEM 359 379 Helical; Name=8. {ECO:0000255}.; T…	integral component of membrane [GO:0016021]; substrate-specific transmembrane transporter activity [GO:0022891]; carbohydrate transport [GO:0008643]	carbohydrate transport [GO:0008643]	substrate-specific transmembrane transporter activity [GO:0022891]	integral component of membrane [GO:0016021]	GO:0008643; GO:0016021; GO:0022891							FUNCTION: Low-affinity glucose transporter.		3 out of 5
g4780.t1	GK5S-179	-	4904:0-146	GLC	XYL	OK	110.56	2814.82	4.67014	41.0393	0.00995	0.0704754	no	g4780.t1	P49374	HGT1_KLULA	reviewed	High-affinity glucose transporter	HGT1 KLLA0A11110g	Kluyveromyces lactis (strain ATCC 8585 / CBS 2359 / DSM 70799 / NBRC 1267 / NRRL Y-1140 / WM37) (Yeast) (Candida sphaerica)	551	HGT1		KLLA0A11110g			SUBCELLULAR LOCATION: Membrane; Multi-pass membrane protein.		TOPO_DOM 1 27 Cytoplasmic. {ECO:0000255}.; TOPO_DOM 49 70 Extracellular. {ECO:0000255}.; TOPO_DOM 92 98 Cytoplasmic. {ECO:0000255}.; TOPO_DOM 120 123 Extracellular. {ECO:0000255}.; TOPO_DOM 145 155 Cytoplasmic. {ECO:0000255}.; TOPO_DOM 177 190 Extracellular. {ECO:0000255}.; TOPO_DOM 212 289 Cytoplasmic. {ECO:0000255}.; TOPO_DOM 311 315 Extracellular. {ECO:0000255}.; TOPO_DOM 337 343 Cytoplasmic. …	TRANSMEM 28 48 Helical; Name=1. {ECO:0000255}.; TRANSMEM 71 91 Helical; Name=2. {ECO:0000255}.; TRANSMEM 99 119 Helical; Name=3. {ECO:0000255}.; TRANSMEM 124 144 Helical; Name=4. {ECO:0000255}.; TRANSMEM 156 176 Helical; Name=5. {ECO:0000255}.; TRANSMEM 191 211 Helical; Name=6. {ECO:0000255}.; TRANSMEM 290 310 Helical; Name=7. {ECO:0000255}.; TRANSMEM 316 336 Helical; Name=8. {ECO:0000255}.; TRAN…	integral component of membrane [GO:0016021]; substrate-specific transmembrane transporter activity [GO:0022891]; carbohydrate transport [GO:0008643]	carbohydrate transport [GO:0008643]	substrate-specific transmembrane transporter activity [GO:0022891]	integral component of membrane [GO:0016021]	GO:0008643; GO:0016021; GO:0022891							FUNCTION: High-affinity glucose transporter.		2 out of 5
g3256.t1	GK5S-1725	-	3099:0-274	GLC	XYL	OK	40.5798	1020.09	4.6518	12.6051	5e-05	0.00100773	yes	g3256.t1	P49374	HGT1_KLULA	reviewed	High-affinity glucose transporter	HGT1 KLLA0A11110g	Kluyveromyces lactis (strain ATCC 8585 / CBS 2359 / DSM 70799 / NBRC 1267 / NRRL Y-1140 / WM37) (Yeast) (Candida sphaerica)	551	HGT1		KLLA0A11110g			SUBCELLULAR LOCATION: Membrane; Multi-pass membrane protein.		TOPO_DOM 1 27 Cytoplasmic. {ECO:0000255}.; TOPO_DOM 49 70 Extracellular. {ECO:0000255}.; TOPO_DOM 92 98 Cytoplasmic. {ECO:0000255}.; TOPO_DOM 120 123 Extracellular. {ECO:0000255}.; TOPO_DOM 145 155 Cytoplasmic. {ECO:0000255}.; TOPO_DOM 177 190 Extracellular. {ECO:0000255}.; TOPO_DOM 212 289 Cytoplasmic. {ECO:0000255}.; TOPO_DOM 311 315 Extracellular. {ECO:0000255}.; TOPO_DOM 337 343 Cytoplasmic. …	TRANSMEM 28 48 Helical; Name=1. {ECO:0000255}.; TRANSMEM 71 91 Helical; Name=2. {ECO:0000255}.; TRANSMEM 99 119 Helical; Name=3. {ECO:0000255}.; TRANSMEM 124 144 Helical; Name=4. {ECO:0000255}.; TRANSMEM 156 176 Helical; Name=5. {ECO:0000255}.; TRANSMEM 191 211 Helical; Name=6. {ECO:0000255}.; TRANSMEM 290 310 Helical; Name=7. {ECO:0000255}.; TRANSMEM 316 336 Helical; Name=8. {ECO:0000255}.; TRAN…	integral component of membrane [GO:0016021]; substrate-specific transmembrane transporter activity [GO:0022891]; carbohydrate transport [GO:0008643]	carbohydrate transport [GO:0008643]	substrate-specific transmembrane transporter activity [GO:0022891]	integral component of membrane [GO:0016021]	GO:0008643; GO:0016021; GO:0022891							FUNCTION: High-affinity glucose transporter.		2 out of 5
g3229.t1	GK5S-1752	-	3086:0-642	GLC	XYL	OK	99.8875	2222.9	4.47599	9.35508	5e-05	0.00100773	yes	g3229.t1	P07921	LACP_KLULA	reviewed	Lactose permease	LAC12 KLLA0B14861g	Kluyveromyces lactis (strain ATCC 8585 / CBS 2359 / DSM 70799 / NBRC 1267 / NRRL Y-1140 / WM37) (Yeast) (Candida sphaerica)	587	LAC12		KLLA0B14861g			SUBCELLULAR LOCATION: Membrane; Multi-pass membrane protein.		TOPO_DOM 1 72 Cytoplasmic. {ECO:0000255}.; TOPO_DOM 94 116 Extracellular. {ECO:0000255}.; TOPO_DOM 138 143 Cytoplasmic. {ECO:0000255}.; TOPO_DOM 165 167 Extracellular. {ECO:0000255}.; TOPO_DOM 189 202 Cytoplasmic. {ECO:0000255}.; TOPO_DOM 224 237 Extracellular. {ECO:0000255}.; TOPO_DOM 259 330 Cytoplasmic. {ECO:0000255}.; TOPO_DOM 352 370 Extracellular. {ECO:0000255}.; TOPO_DOM 392 394 Cytoplasmi…	TRANSMEM 73 93 Helical; Name=1. {ECO:0000255}.; TRANSMEM 117 137 Helical; Name=2. {ECO:0000255}.; TRANSMEM 144 164 Helical; Name=3. {ECO:0000255}.; TRANSMEM 168 188 Helical; Name=4. {ECO:0000255}.; TRANSMEM 203 223 Helical; Name=5. {ECO:0000255}.; TRANSMEM 238 258 Helical; Name=6. {ECO:0000255}.; TRANSMEM 331 351 Helical; Name=7. {ECO:0000255}.; TRANSMEM 371 391 Helical; Name=8. {ECO:0000255}.; T…	integral component of membrane [GO:0016021]; substrate-specific transmembrane transporter activity [GO:0022891]; symporter activity [GO:0015293]; carbohydrate transport [GO:0008643]	carbohydrate transport [GO:0008643]	substrate-specific transmembrane transporter activity [GO:0022891]; symporter activity [GO:0015293]	integral component of membrane [GO:0016021]	GO:0008643; GO:0016021; GO:0022891; GO:0015293							FUNCTION: LAC12 mediates the transport of lactose and it would appear that the permease works in part by a proton symport mechanism.		3 out of 5
g3816.t1	GK5S-1157	-	3647:0-523	GLC	XYL	OK	8.63077	185.488	4.4257	6.4348	0.00055	0.00764142	yes	g3816.t1	P53387	KHT2_KLULC	reviewed	Hexose transporter 2	KHT2	Kluyveromyces lactis (Yeast) (Candida sphaerica)	566	KHT2					SUBCELLULAR LOCATION: Membrane; Multi-pass membrane protein.		TOPO_DOM 22 61 Cytoplasmic. {ECO:0000255}.; TOPO_DOM 83 112 Extracellular. {ECO:0000255}.; TOPO_DOM 134 140 Cytoplasmic. {ECO:0000255}.; TOPO_DOM 162 166 Extracellular. {ECO:0000255}.; TOPO_DOM 188 198 Cytoplasmic. {ECO:0000255}.; TOPO_DOM 220 233 Extracellular. {ECO:0000255}.; TOPO_DOM 255 333 Cytoplasmic. {ECO:0000255}.; TOPO_DOM 354 357 Extracellular. {ECO:0000255}.; TOPO_DOM 379 385 Cytoplasm…	TRANSMEM 62 82 Helical; Name=1. {ECO:0000255}.; TRANSMEM 113 133 Helical; Name=2. {ECO:0000255}.; TRANSMEM 141 161 Helical; Name=3. {ECO:0000255}.; TRANSMEM 167 187 Helical; Name=4. {ECO:0000255}.; TRANSMEM 199 219 Helical; Name=5. {ECO:0000255}.; TRANSMEM 234 254 Helical; Name=6. {ECO:0000255}.; TRANSMEM 334 353 Helical; Name=7. {ECO:0000255}.; TRANSMEM 358 378 Helical; Name=8. {ECO:0000255}.; T…	integral component of membrane [GO:0016021]; substrate-specific transmembrane transporter activity [GO:0022891]; carbohydrate transport [GO:0008643]	carbohydrate transport [GO:0008643]	substrate-specific transmembrane transporter activity [GO:0022891]	integral component of membrane [GO:0016021]	GO:0008643; GO:0016021; GO:0022891							FUNCTION: Probable glucose transporter.		2 out of 5
g3266.t1	GK5S-1705	-	3105:15065-17091	GLC	XYL	OK	9.83904	178.884	4.18436	6.85547	5e-05	0.00100773	yes	g3266.t1	P39932	STL1_YEAST	reviewed	Sugar transporter STL1	STL1 YDR536W D9719.39	Saccharomyces cerevisiae (strain ATCC 204508 / S288c) (Baker's yeast)	569	STL1		YDR536W	D9719.39		SUBCELLULAR LOCATION: Membrane; Multi-pass membrane protein.		TOPO_DOM 1 29 Cytoplasmic. {ECO:0000255}.; TOPO_DOM 51 79 Extracellular. {ECO:0000255}.; TOPO_DOM 101 107 Cytoplasmic. {ECO:0000255}.; TOPO_DOM 129 129 Extracellular. {ECO:0000255}.; TOPO_DOM 151 168 Cytoplasmic. {ECO:0000255}.; TOPO_DOM 190 203 Extracellular. {ECO:0000255}.; TOPO_DOM 225 291 Cytoplasmic. {ECO:0000255}.; TOPO_DOM 313 330 Extracellular. {ECO:0000255}.; TOPO_DOM 352 358 Cytoplasmic…	TRANSMEM 30 50 Helical; Name=1. {ECO:0000255}.; TRANSMEM 80 100 Helical; Name=2. {ECO:0000255}.; TRANSMEM 108 128 Helical; Name=3. {ECO:0000255}.; TRANSMEM 130 150 Helical; Name=4. {ECO:0000255}.; TRANSMEM 169 189 Helical; Name=5. {ECO:0000255}.; TRANSMEM 204 224 Helical; Name=6. {ECO:0000255}.; TRANSMEM 292 312 Helical; Name=7. {ECO:0000255}.; TRANSMEM 331 351 Helical; Name=8. {ECO:0000255}.; TR…	integral component of membrane [GO:0016021]; plasma membrane [GO:0005886]; solute:proton symporter activity [GO:0015295]; glycerol transport [GO:0015793]; proton transport [GO:0015992]; transmembrane transport [GO:0055085]	glycerol transport [GO:0015793]; proton transport [GO:0015992]; transmembrane transport [GO:0055085]	solute:proton symporter activity [GO:0015295]	integral component of membrane [GO:0016021]; plasma membrane [GO:0005886]	GO:0015793; GO:0016021; GO:0005886; GO:0015992; GO:0015295; GO:0055085									3 out of 5		32584;	DIP-5275N;	P39932;	MINT-551224;
g4007.t1	GK5S-964	-	3937:0-305	GLC	XYL	OK	95.5299	1625.28	4.0886	12.3952	5e-05	0.00100773	yes	g4007.t1	P07921	LACP_KLULA	reviewed	Lactose permease	LAC12 KLLA0B14861g	Kluyveromyces lactis (strain ATCC 8585 / CBS 2359 / DSM 70799 / NBRC 1267 / NRRL Y-1140 / WM37) (Yeast) (Candida sphaerica)	587	LAC12		KLLA0B14861g			SUBCELLULAR LOCATION: Membrane; Multi-pass membrane protein.		TOPO_DOM 1 72 Cytoplasmic. {ECO:0000255}.; TOPO_DOM 94 116 Extracellular. {ECO:0000255}.; TOPO_DOM 138 143 Cytoplasmic. {ECO:0000255}.; TOPO_DOM 165 167 Extracellular. {ECO:0000255}.; TOPO_DOM 189 202 Cytoplasmic. {ECO:0000255}.; TOPO_DOM 224 237 Extracellular. {ECO:0000255}.; TOPO_DOM 259 330 Cytoplasmic. {ECO:0000255}.; TOPO_DOM 352 370 Extracellular. {ECO:0000255}.; TOPO_DOM 392 394 Cytoplasmi…	TRANSMEM 73 93 Helical; Name=1. {ECO:0000255}.; TRANSMEM 117 137 Helical; Name=2. {ECO:0000255}.; TRANSMEM 144 164 Helical; Name=3. {ECO:0000255}.; TRANSMEM 168 188 Helical; Name=4. {ECO:0000255}.; TRANSMEM 203 223 Helical; Name=5. {ECO:0000255}.; TRANSMEM 238 258 Helical; Name=6. {ECO:0000255}.; TRANSMEM 331 351 Helical; Name=7. {ECO:0000255}.; TRANSMEM 371 391 Helical; Name=8. {ECO:0000255}.; T…	integral component of membrane [GO:0016021]; substrate-specific transmembrane transporter activity [GO:0022891]; symporter activity [GO:0015293]; carbohydrate transport [GO:0008643]	carbohydrate transport [GO:0008643]	substrate-specific transmembrane transporter activity [GO:0022891]; symporter activity [GO:0015293]	integral component of membrane [GO:0016021]	GO:0008643; GO:0016021; GO:0022891; GO:0015293							FUNCTION: LAC12 mediates the transport of lactose and it would appear that the permease works in part by a proton symport mechanism.		3 out of 5
g2603.t1	GK5S-2389	-	2507:0-288	GLC	XYL	OK	24.2614	353.201	3.86376	8.7195	0.00125	0.0148232	yes	g2603.t1	P49374	HGT1_KLULA	reviewed	High-affinity glucose transporter	HGT1 KLLA0A11110g	Kluyveromyces lactis (strain ATCC 8585 / CBS 2359 / DSM 70799 / NBRC 1267 / NRRL Y-1140 / WM37) (Yeast) (Candida sphaerica)	551	HGT1		KLLA0A11110g			SUBCELLULAR LOCATION: Membrane; Multi-pass membrane protein.		TOPO_DOM 1 27 Cytoplasmic. {ECO:0000255}.; TOPO_DOM 49 70 Extracellular. {ECO:0000255}.; TOPO_DOM 92 98 Cytoplasmic. {ECO:0000255}.; TOPO_DOM 120 123 Extracellular. {ECO:0000255}.; TOPO_DOM 145 155 Cytoplasmic. {ECO:0000255}.; TOPO_DOM 177 190 Extracellular. {ECO:0000255}.; TOPO_DOM 212 289 Cytoplasmic. {ECO:0000255}.; TOPO_DOM 311 315 Extracellular. {ECO:0000255}.; TOPO_DOM 337 343 Cytoplasmic. …	TRANSMEM 28 48 Helical; Name=1. {ECO:0000255}.; TRANSMEM 71 91 Helical; Name=2. {ECO:0000255}.; TRANSMEM 99 119 Helical; Name=3. {ECO:0000255}.; TRANSMEM 124 144 Helical; Name=4. {ECO:0000255}.; TRANSMEM 156 176 Helical; Name=5. {ECO:0000255}.; TRANSMEM 191 211 Helical; Name=6. {ECO:0000255}.; TRANSMEM 290 310 Helical; Name=7. {ECO:0000255}.; TRANSMEM 316 336 Helical; Name=8. {ECO:0000255}.; TRAN…	integral component of membrane [GO:0016021]; substrate-specific transmembrane transporter activity [GO:0022891]; carbohydrate transport [GO:0008643]	carbohydrate transport [GO:0008643]	substrate-specific transmembrane transporter activity [GO:0022891]	integral component of membrane [GO:0016021]	GO:0008643; GO:0016021; GO:0022891							FUNCTION: High-affinity glucose transporter.		2 out of 5
g2007.t1	GK5S-2998	-	2068:0-231	GLC	XYL	OK	33.6715	463.472	3.78288	10.7811	0.0022	0.0231123	yes	g2007.t1	P49374	HGT1_KLULA	reviewed	High-affinity glucose transporter	HGT1 KLLA0A11110g	Kluyveromyces lactis (strain ATCC 8585 / CBS 2359 / DSM 70799 / NBRC 1267 / NRRL Y-1140 / WM37) (Yeast) (Candida sphaerica)	551	HGT1		KLLA0A11110g			SUBCELLULAR LOCATION: Membrane; Multi-pass membrane protein.		TOPO_DOM 1 27 Cytoplasmic. {ECO:0000255}.; TOPO_DOM 49 70 Extracellular. {ECO:0000255}.; TOPO_DOM 92 98 Cytoplasmic. {ECO:0000255}.; TOPO_DOM 120 123 Extracellular. {ECO:0000255}.; TOPO_DOM 145 155 Cytoplasmic. {ECO:0000255}.; TOPO_DOM 177 190 Extracellular. {ECO:0000255}.; TOPO_DOM 212 289 Cytoplasmic. {ECO:0000255}.; TOPO_DOM 311 315 Extracellular. {ECO:0000255}.; TOPO_DOM 337 343 Cytoplasmic. …	TRANSMEM 28 48 Helical; Name=1. {ECO:0000255}.; TRANSMEM 71 91 Helical; Name=2. {ECO:0000255}.; TRANSMEM 99 119 Helical; Name=3. {ECO:0000255}.; TRANSMEM 124 144 Helical; Name=4. {ECO:0000255}.; TRANSMEM 156 176 Helical; Name=5. {ECO:0000255}.; TRANSMEM 191 211 Helical; Name=6. {ECO:0000255}.; TRANSMEM 290 310 Helical; Name=7. {ECO:0000255}.; TRANSMEM 316 336 Helical; Name=8. {ECO:0000255}.; TRAN…	integral component of membrane [GO:0016021]; substrate-specific transmembrane transporter activity [GO:0022891]; carbohydrate transport [GO:0008643]	carbohydrate transport [GO:0008643]	substrate-specific transmembrane transporter activity [GO:0022891]	integral component of membrane [GO:0016021]	GO:0008643; GO:0016021; GO:0022891							FUNCTION: High-affinity glucose transporter.		2 out of 5
g644.t1	GK5S-4380	-	711:10-395	GLC	XYL	OK	27.8607	334.758	3.58682	7.32524	5e-05	0.00100773	yes	g644.t1	P49374	HGT1_KLULA	reviewed	High-affinity glucose transporter	HGT1 KLLA0A11110g	Kluyveromyces lactis (strain ATCC 8585 / CBS 2359 / DSM 70799 / NBRC 1267 / NRRL Y-1140 / WM37) (Yeast) (Candida sphaerica)	551	HGT1		KLLA0A11110g			SUBCELLULAR LOCATION: Membrane; Multi-pass membrane protein.		TOPO_DOM 1 27 Cytoplasmic. {ECO:0000255}.; TOPO_DOM 49 70 Extracellular. {ECO:0000255}.; TOPO_DOM 92 98 Cytoplasmic. {ECO:0000255}.; TOPO_DOM 120 123 Extracellular. {ECO:0000255}.; TOPO_DOM 145 155 Cytoplasmic. {ECO:0000255}.; TOPO_DOM 177 190 Extracellular. {ECO:0000255}.; TOPO_DOM 212 289 Cytoplasmic. {ECO:0000255}.; TOPO_DOM 311 315 Extracellular. {ECO:0000255}.; TOPO_DOM 337 343 Cytoplasmic. …	TRANSMEM 28 48 Helical; Name=1. {ECO:0000255}.; TRANSMEM 71 91 Helical; Name=2. {ECO:0000255}.; TRANSMEM 99 119 Helical; Name=3. {ECO:0000255}.; TRANSMEM 124 144 Helical; Name=4. {ECO:0000255}.; TRANSMEM 156 176 Helical; Name=5. {ECO:0000255}.; TRANSMEM 191 211 Helical; Name=6. {ECO:0000255}.; TRANSMEM 290 310 Helical; Name=7. {ECO:0000255}.; TRANSMEM 316 336 Helical; Name=8. {ECO:0000255}.; TRAN…	integral component of membrane [GO:0016021]; substrate-specific transmembrane transporter activity [GO:0022891]; carbohydrate transport [GO:0008643]	carbohydrate transport [GO:0008643]	substrate-specific transmembrane transporter activity [GO:0022891]	integral component of membrane [GO:0016021]	GO:0008643; GO:0016021; GO:0022891							FUNCTION: High-affinity glucose transporter.		2 out of 5
g3259.t1	GK5S-1723	-	3101:4672-5081	GLC	XYL	OK	29.4682	325.679	3.46622	7.28518	5e-05	0.00100773	yes	g3259.t1	P49374	HGT1_KLULA	reviewed	High-affinity glucose transporter	HGT1 KLLA0A11110g	Kluyveromyces lactis (strain ATCC 8585 / CBS 2359 / DSM 70799 / NBRC 1267 / NRRL Y-1140 / WM37) (Yeast) (Candida sphaerica)	551	HGT1		KLLA0A11110g			SUBCELLULAR LOCATION: Membrane; Multi-pass membrane protein.		TOPO_DOM 1 27 Cytoplasmic. {ECO:0000255}.; TOPO_DOM 49 70 Extracellular. {ECO:0000255}.; TOPO_DOM 92 98 Cytoplasmic. {ECO:0000255}.; TOPO_DOM 120 123 Extracellular. {ECO:0000255}.; TOPO_DOM 145 155 Cytoplasmic. {ECO:0000255}.; TOPO_DOM 177 190 Extracellular. {ECO:0000255}.; TOPO_DOM 212 289 Cytoplasmic. {ECO:0000255}.; TOPO_DOM 311 315 Extracellular. {ECO:0000255}.; TOPO_DOM 337 343 Cytoplasmic. …	TRANSMEM 28 48 Helical; Name=1. {ECO:0000255}.; TRANSMEM 71 91 Helical; Name=2. {ECO:0000255}.; TRANSMEM 99 119 Helical; Name=3. {ECO:0000255}.; TRANSMEM 124 144 Helical; Name=4. {ECO:0000255}.; TRANSMEM 156 176 Helical; Name=5. {ECO:0000255}.; TRANSMEM 191 211 Helical; Name=6. {ECO:0000255}.; TRANSMEM 290 310 Helical; Name=7. {ECO:0000255}.; TRANSMEM 316 336 Helical; Name=8. {ECO:0000255}.; TRAN…	integral component of membrane [GO:0016021]; substrate-specific transmembrane transporter activity [GO:0022891]; carbohydrate transport [GO:0008643]	carbohydrate transport [GO:0008643]	substrate-specific transmembrane transporter activity [GO:0022891]	integral component of membrane [GO:0016021]	GO:0008643; GO:0016021; GO:0022891							FUNCTION: High-affinity glucose transporter.		2 out of 5
g1827.t1	GK5S-3181	-	1883:0-300	GLC	XYL	OK	42.6188	454.808	3.4157	8.65936	0.0001	0.00179923	yes	g1827.t1	P49374	HGT1_KLULA	reviewed	High-affinity glucose transporter	HGT1 KLLA0A11110g	Kluyveromyces lactis (strain ATCC 8585 / CBS 2359 / DSM 70799 / NBRC 1267 / NRRL Y-1140 / WM37) (Yeast) (Candida sphaerica)	551	HGT1		KLLA0A11110g			SUBCELLULAR LOCATION: Membrane; Multi-pass membrane protein.		TOPO_DOM 1 27 Cytoplasmic. {ECO:0000255}.; TOPO_DOM 49 70 Extracellular. {ECO:0000255}.; TOPO_DOM 92 98 Cytoplasmic. {ECO:0000255}.; TOPO_DOM 120 123 Extracellular. {ECO:0000255}.; TOPO_DOM 145 155 Cytoplasmic. {ECO:0000255}.; TOPO_DOM 177 190 Extracellular. {ECO:0000255}.; TOPO_DOM 212 289 Cytoplasmic. {ECO:0000255}.; TOPO_DOM 311 315 Extracellular. {ECO:0000255}.; TOPO_DOM 337 343 Cytoplasmic. …	TRANSMEM 28 48 Helical; Name=1. {ECO:0000255}.; TRANSMEM 71 91 Helical; Name=2. {ECO:0000255}.; TRANSMEM 99 119 Helical; Name=3. {ECO:0000255}.; TRANSMEM 124 144 Helical; Name=4. {ECO:0000255}.; TRANSMEM 156 176 Helical; Name=5. {ECO:0000255}.; TRANSMEM 191 211 Helical; Name=6. {ECO:0000255}.; TRANSMEM 290 310 Helical; Name=7. {ECO:0000255}.; TRANSMEM 316 336 Helical; Name=8. {ECO:0000255}.; TRAN…	integral component of membrane [GO:0016021]; substrate-specific transmembrane transporter activity [GO:0022891]; carbohydrate transport [GO:0008643]	carbohydrate transport [GO:0008643]	substrate-specific transmembrane transporter activity [GO:0022891]	integral component of membrane [GO:0016021]	GO:0008643; GO:0016021; GO:0022891							FUNCTION: High-affinity glucose transporter.		2 out of 5
g2453.t1	GK5S-2542	-	2413:1078-1865	GLC	XYL	OK	17.0004	154.56	3.18452	5.38205	5e-05	0.00100773	yes	g2453.t1	P49374	HGT1_KLULA	reviewed	High-affinity glucose transporter	HGT1 KLLA0A11110g	Kluyveromyces lactis (strain ATCC 8585 / CBS 2359 / DSM 70799 / NBRC 1267 / NRRL Y-1140 / WM37) (Yeast) (Candida sphaerica)	551	HGT1		KLLA0A11110g			SUBCELLULAR LOCATION: Membrane; Multi-pass membrane protein.		TOPO_DOM 1 27 Cytoplasmic. {ECO:0000255}.; TOPO_DOM 49 70 Extracellular. {ECO:0000255}.; TOPO_DOM 92 98 Cytoplasmic. {ECO:0000255}.; TOPO_DOM 120 123 Extracellular. {ECO:0000255}.; TOPO_DOM 145 155 Cytoplasmic. {ECO:0000255}.; TOPO_DOM 177 190 Extracellular. {ECO:0000255}.; TOPO_DOM 212 289 Cytoplasmic. {ECO:0000255}.; TOPO_DOM 311 315 Extracellular. {ECO:0000255}.; TOPO_DOM 337 343 Cytoplasmic. …	TRANSMEM 28 48 Helical; Name=1. {ECO:0000255}.; TRANSMEM 71 91 Helical; Name=2. {ECO:0000255}.; TRANSMEM 99 119 Helical; Name=3. {ECO:0000255}.; TRANSMEM 124 144 Helical; Name=4. {ECO:0000255}.; TRANSMEM 156 176 Helical; Name=5. {ECO:0000255}.; TRANSMEM 191 211 Helical; Name=6. {ECO:0000255}.; TRANSMEM 290 310 Helical; Name=7. {ECO:0000255}.; TRANSMEM 316 336 Helical; Name=8. {ECO:0000255}.; TRAN…	integral component of membrane [GO:0016021]; substrate-specific transmembrane transporter activity [GO:0022891]; carbohydrate transport [GO:0008643]	carbohydrate transport [GO:0008643]	substrate-specific transmembrane transporter activity [GO:0022891]	integral component of membrane [GO:0016021]	GO:0008643; GO:0016021; GO:0022891							FUNCTION: High-affinity glucose transporter.		2 out of 5
g4204.t1	GK5S-765	-	4143:0-204	GLC	XYL	OK	38.4465	206.714	2.42671	7.9266	0.0238	0.131333	no	g4204.t1	P49374	HGT1_KLULA	reviewed	High-affinity glucose transporter	HGT1 KLLA0A11110g	Kluyveromyces lactis (strain ATCC 8585 / CBS 2359 / DSM 70799 / NBRC 1267 / NRRL Y-1140 / WM37) (Yeast) (Candida sphaerica)	551	HGT1		KLLA0A11110g			SUBCELLULAR LOCATION: Membrane; Multi-pass membrane protein.		TOPO_DOM 1 27 Cytoplasmic. {ECO:0000255}.; TOPO_DOM 49 70 Extracellular. {ECO:0000255}.; TOPO_DOM 92 98 Cytoplasmic. {ECO:0000255}.; TOPO_DOM 120 123 Extracellular. {ECO:0000255}.; TOPO_DOM 145 155 Cytoplasmic. {ECO:0000255}.; TOPO_DOM 177 190 Extracellular. {ECO:0000255}.; TOPO_DOM 212 289 Cytoplasmic. {ECO:0000255}.; TOPO_DOM 311 315 Extracellular. {ECO:0000255}.; TOPO_DOM 337 343 Cytoplasmic. …	TRANSMEM 28 48 Helical; Name=1. {ECO:0000255}.; TRANSMEM 71 91 Helical; Name=2. {ECO:0000255}.; TRANSMEM 99 119 Helical; Name=3. {ECO:0000255}.; TRANSMEM 124 144 Helical; Name=4. {ECO:0000255}.; TRANSMEM 156 176 Helical; Name=5. {ECO:0000255}.; TRANSMEM 191 211 Helical; Name=6. {ECO:0000255}.; TRANSMEM 290 310 Helical; Name=7. {ECO:0000255}.; TRANSMEM 316 336 Helical; Name=8. {ECO:0000255}.; TRAN…	integral component of membrane [GO:0016021]; substrate-specific transmembrane transporter activity [GO:0022891]; carbohydrate transport [GO:0008643]	carbohydrate transport [GO:0008643]	substrate-specific transmembrane transporter activity [GO:0022891]	integral component of membrane [GO:0016021]	GO:0008643; GO:0016021; GO:0022891							FUNCTION: High-affinity glucose transporter.		2 out of 5
g3170.t1	GK5S-1809	-	3033:1244-2985	GLC	XYL	OK	30.3133	140.005	2.20746	3.91855	5e-05	0.00100773	yes	g3170.t1	P07921	LACP_KLULA	reviewed	Lactose permease	LAC12 KLLA0B14861g	Kluyveromyces lactis (strain ATCC 8585 / CBS 2359 / DSM 70799 / NBRC 1267 / NRRL Y-1140 / WM37) (Yeast) (Candida sphaerica)	587	LAC12		KLLA0B14861g			SUBCELLULAR LOCATION: Membrane; Multi-pass membrane protein.		TOPO_DOM 1 72 Cytoplasmic. {ECO:0000255}.; TOPO_DOM 94 116 Extracellular. {ECO:0000255}.; TOPO_DOM 138 143 Cytoplasmic. {ECO:0000255}.; TOPO_DOM 165 167 Extracellular. {ECO:0000255}.; TOPO_DOM 189 202 Cytoplasmic. {ECO:0000255}.; TOPO_DOM 224 237 Extracellular. {ECO:0000255}.; TOPO_DOM 259 330 Cytoplasmic. {ECO:0000255}.; TOPO_DOM 352 370 Extracellular. {ECO:0000255}.; TOPO_DOM 392 394 Cytoplasmi…	TRANSMEM 73 93 Helical; Name=1. {ECO:0000255}.; TRANSMEM 117 137 Helical; Name=2. {ECO:0000255}.; TRANSMEM 144 164 Helical; Name=3. {ECO:0000255}.; TRANSMEM 168 188 Helical; Name=4. {ECO:0000255}.; TRANSMEM 203 223 Helical; Name=5. {ECO:0000255}.; TRANSMEM 238 258 Helical; Name=6. {ECO:0000255}.; TRANSMEM 331 351 Helical; Name=7. {ECO:0000255}.; TRANSMEM 371 391 Helical; Name=8. {ECO:0000255}.; T…	integral component of membrane [GO:0016021]; substrate-specific transmembrane transporter activity [GO:0022891]; symporter activity [GO:0015293]; carbohydrate transport [GO:0008643]	carbohydrate transport [GO:0008643]	substrate-specific transmembrane transporter activity [GO:0022891]; symporter activity [GO:0015293]	integral component of membrane [GO:0016021]	GO:0008643; GO:0016021; GO:0022891; GO:0015293							FUNCTION: LAC12 mediates the transport of lactose and it would appear that the permease works in part by a proton symport mechanism.		3 out of 5
g1766.t1	GK5S-3244	-	1814:596-2160	GLC	XYL	OK	12.6361	53.2995	2.07657	3.37836	0.0003	0.00454452	yes	g1766.t1	P54854	HXT15_YEAST	reviewed	Hexose transporter HXT15	HXT15 YDL245C	Saccharomyces cerevisiae (strain ATCC 204508 / S288c) (Baker's yeast)	567	HXT15		YDL245C			SUBCELLULAR LOCATION: Membrane; Multi-pass membrane protein.		TOPO_DOM 1 55 Cytoplasmic. {ECO:0000255}.; TOPO_DOM 77 112 Extracellular. {ECO:0000255}.; TOPO_DOM 134 139 Cytoplasmic. {ECO:0000255}.; TOPO_DOM 161 170 Extracellular. {ECO:0000255}.; TOPO_DOM 192 197 Cytoplasmic. {ECO:0000255}.; TOPO_DOM 219 232 Extracellular. {ECO:0000255}.; TOPO_DOM 254 336 Cytoplasmic. {ECO:0000255}.; TOPO_DOM 354 359 Extracellular. {ECO:0000255}.; TOPO_DOM 378 384 Cytoplasmi…	TRANSMEM 56 76 Helical; Name=1. {ECO:0000255}.; TRANSMEM 113 133 Helical; Name=2. {ECO:0000255}.; TRANSMEM 140 160 Helical; Name=3. {ECO:0000255}.; TRANSMEM 171 191 Helical; Name=4. {ECO:0000255}.; TRANSMEM 198 218 Helical; Name=5. {ECO:0000255}.; TRANSMEM 233 253 Helical; Name=6. {ECO:0000255}.; TRANSMEM 337 353 Helical; Name=7. {ECO:0000255}.; TRANSMEM 360 377 Helical; Name=8. {ECO:0000255}.; T…	integral component of membrane [GO:0016021]; plasma membrane [GO:0005886]; fructose transmembrane transporter activity [GO:0005353]; glucose transmembrane transporter activity [GO:0005355]; mannose transmembrane transporter activity [GO:0015578]; fructose transport [GO:0015755]; glucose transport [GO:0015758]; hexose transport [GO:0008645]; mannose transport [GO:0015761]; transmembrane transport …	fructose transport [GO:0015755]; glucose transport [GO:0015758]; hexose transport [GO:0008645]; mannose transport [GO:0015761]; transmembrane transport [GO:0055085]	fructose transmembrane transporter activity [GO:0005353]; glucose transmembrane transporter activity [GO:0005355]; mannose transmembrane transporter activity [GO:0015578]	integral component of membrane [GO:0016021]; plasma membrane [GO:0005886]	GO:0005353; GO:0015755; GO:0005355; GO:0015758; GO:0008645; GO:0016021; GO:0015578; GO:0015761; GO:0005886; GO:0055085							FUNCTION: Probable glucose transporter.		4 out of 5		31867;	DIP-7210N;	P54854;	MINT-1356440;
g281.t1	GK5S-4745	-	295:11934-13759	GLC	XYL	OK	47.2305	181.124	1.93919	3.51213	5e-05	0.00100773	yes	g281.t1	P39932	STL1_YEAST	reviewed	Sugar transporter STL1	STL1 YDR536W D9719.39	Saccharomyces cerevisiae (strain ATCC 204508 / S288c) (Baker's yeast)	569	STL1		YDR536W	D9719.39		SUBCELLULAR LOCATION: Membrane; Multi-pass membrane protein.		TOPO_DOM 1 29 Cytoplasmic. {ECO:0000255}.; TOPO_DOM 51 79 Extracellular. {ECO:0000255}.; TOPO_DOM 101 107 Cytoplasmic. {ECO:0000255}.; TOPO_DOM 129 129 Extracellular. {ECO:0000255}.; TOPO_DOM 151 168 Cytoplasmic. {ECO:0000255}.; TOPO_DOM 190 203 Extracellular. {ECO:0000255}.; TOPO_DOM 225 291 Cytoplasmic. {ECO:0000255}.; TOPO_DOM 313 330 Extracellular. {ECO:0000255}.; TOPO_DOM 352 358 Cytoplasmic…	TRANSMEM 30 50 Helical; Name=1. {ECO:0000255}.; TRANSMEM 80 100 Helical; Name=2. {ECO:0000255}.; TRANSMEM 108 128 Helical; Name=3. {ECO:0000255}.; TRANSMEM 130 150 Helical; Name=4. {ECO:0000255}.; TRANSMEM 169 189 Helical; Name=5. {ECO:0000255}.; TRANSMEM 204 224 Helical; Name=6. {ECO:0000255}.; TRANSMEM 292 312 Helical; Name=7. {ECO:0000255}.; TRANSMEM 331 351 Helical; Name=8. {ECO:0000255}.; TR…	integral component of membrane [GO:0016021]; plasma membrane [GO:0005886]; solute:proton symporter activity [GO:0015295]; glycerol transport [GO:0015793]; proton transport [GO:0015992]; transmembrane transport [GO:0055085]	glycerol transport [GO:0015793]; proton transport [GO:0015992]; transmembrane transport [GO:0055085]	solute:proton symporter activity [GO:0015295]	integral component of membrane [GO:0016021]; plasma membrane [GO:0005886]	GO:0015793; GO:0016021; GO:0005886; GO:0015992; GO:0015295; GO:0055085									3 out of 5		32584;	DIP-5275N;	P39932;	MINT-551224;
g3000.t1	GK5S-1983	-	2890:8597-10359	GLC	XYL	OK	5.82902	17.1021	1.55285	2.11719	0.01285	0.0857153	no	g3000.t1	P07921	LACP_KLULA	reviewed	Lactose permease	LAC12 KLLA0B14861g	Kluyveromyces lactis (strain ATCC 8585 / CBS 2359 / DSM 70799 / NBRC 1267 / NRRL Y-1140 / WM37) (Yeast) (Candida sphaerica)	587	LAC12		KLLA0B14861g			SUBCELLULAR LOCATION: Membrane; Multi-pass membrane protein.		TOPO_DOM 1 72 Cytoplasmic. {ECO:0000255}.; TOPO_DOM 94 116 Extracellular. {ECO:0000255}.; TOPO_DOM 138 143 Cytoplasmic. {ECO:0000255}.; TOPO_DOM 165 167 Extracellular. {ECO:0000255}.; TOPO_DOM 189 202 Cytoplasmic. {ECO:0000255}.; TOPO_DOM 224 237 Extracellular. {ECO:0000255}.; TOPO_DOM 259 330 Cytoplasmic. {ECO:0000255}.; TOPO_DOM 352 370 Extracellular. {ECO:0000255}.; TOPO_DOM 392 394 Cytoplasmi…	TRANSMEM 73 93 Helical; Name=1. {ECO:0000255}.; TRANSMEM 117 137 Helical; Name=2. {ECO:0000255}.; TRANSMEM 144 164 Helical; Name=3. {ECO:0000255}.; TRANSMEM 168 188 Helical; Name=4. {ECO:0000255}.; TRANSMEM 203 223 Helical; Name=5. {ECO:0000255}.; TRANSMEM 238 258 Helical; Name=6. {ECO:0000255}.; TRANSMEM 331 351 Helical; Name=7. {ECO:0000255}.; TRANSMEM 371 391 Helical; Name=8. {ECO:0000255}.; T…	integral component of membrane [GO:0016021]; substrate-specific transmembrane transporter activity [GO:0022891]; symporter activity [GO:0015293]; carbohydrate transport [GO:0008643]	carbohydrate transport [GO:0008643]	substrate-specific transmembrane transporter activity [GO:0022891]; symporter activity [GO:0015293]	integral component of membrane [GO:0016021]	GO:0008643; GO:0016021; GO:0022891; GO:0015293							FUNCTION: LAC12 mediates the transport of lactose and it would appear that the permease works in part by a proton symport mechanism.		3 out of 5
g4591.t1	GK5S-369	-	4665:297-2737	GLC	XYL	OK	40.6657	94.7883	1.2209	2.24162	0.0033	0.0323524	yes	g4591.t1	P10870	SNF3_YEAST	reviewed	High-affinity glucose transporter SNF3	SNF3 YDL194W D1234	Saccharomyces cerevisiae (strain ATCC 204508 / S288c) (Baker's yeast)	884	SNF3		YDL194W	D1234		SUBCELLULAR LOCATION: Cell membrane {ECO:0000269|PubMed:3281163}; Multi-pass membrane protein {ECO:0000269|PubMed:3281163}.		TOPO_DOM 1 97 Cytoplasmic. {ECO:0000255}.; TOPO_DOM 119 143 Extracellular. {ECO:0000255}.; TOPO_DOM 165 178 Cytoplasmic. {ECO:0000255}.; TOPO_DOM 200 202 Extracellular. {ECO:0000255}.; TOPO_DOM 224 229 Cytoplasmic. {ECO:0000255}.; TOPO_DOM 251 264 Extracellular. {ECO:0000255}.; TOPO_DOM 286 358 Cytoplasmic. {ECO:0000255}.; TOPO_DOM 380 391 Extracellular. {ECO:0000255}.; TOPO_DOM 413 419 Cytoplasm…	TRANSMEM 98 118 Helical; Name=1. {ECO:0000255}.; TRANSMEM 144 164 Helical; Name=2. {ECO:0000255}.; TRANSMEM 179 199 Helical; Name=3. {ECO:0000255}.; TRANSMEM 203 223 Helical; Name=4. {ECO:0000255}.; TRANSMEM 230 250 Helical; Name=5. {ECO:0000255}.; TRANSMEM 265 285 Helical; Name=6. {ECO:0000255}.; TRANSMEM 359 379 Helical; Name=7. {ECO:0000255}.; TRANSMEM 392 412 Helical; Name=8. {ECO:0000255}.; …	integral component of membrane [GO:0016021]; plasma membrane [GO:0005886]; glucose binding [GO:0005536]; receptor activity [GO:0004872]; substrate-specific transmembrane transporter activity [GO:0022891]; detection of glucose [GO:0051594]; fructose transport [GO:0015755]; glucose transport [GO:0015758]; mannose transport [GO:0015761]; negative regulation of meiotic nuclear division [GO:0045835]; …	detection of glucose [GO:0051594]; fructose transport [GO:0015755]; glucose transport [GO:0015758]; mannose transport [GO:0015761]; negative regulation of meiotic nuclear division [GO:0045835]; signal transduction [GO:0007165]	glucose binding [GO:0005536]; receptor activity [GO:0004872]; substrate-specific transmembrane transporter activity [GO:0022891]	integral component of membrane [GO:0016021]; plasma membrane [GO:0005886]	GO:0051594; GO:0015755; GO:0005536; GO:0015758; GO:0016021; GO:0015761; GO:0045835; GO:0005886; GO:0004872; GO:0007165; GO:0022891	DOMAIN: The C-terminal cytoplasmic domain seems to be important for SNF3 regulatory function.						FUNCTION: High-affinity glucose transporter. Can function as a negative regulator of glucose transport. SNF3 is involved as well in the transport of mannose and fructose. Serves as a sensor that generates an intracellular signal in the presence of low level of glucose. Inhibition of RGT1 by low levels of glucose, and hence induction of HTX2 and HTX4 expression, requires SNF3.		5 out of 5		31851;		P10870;
g1231.t1	GK5S-3774	-	1304:10740-12328	GLC	XYL	OK	6.97237	15.0201	1.10717	1.5252	0.06245	0.25238	no	g1231.t1	P42833	HXT14_YEAST	reviewed	Hexose transporter HXT14	HXT14 HXT9 YNL318C N0345	Saccharomyces cerevisiae (strain ATCC 204508 / S288c) (Baker's yeast)	540	HXT14	HXT9	YNL318C	N0345		SUBCELLULAR LOCATION: Membrane; Multi-pass membrane protein.		TOPO_DOM 1 56 Cytoplasmic. {ECO:0000255}.; TOPO_DOM 77 119 Extracellular. {ECO:0000255}.; TOPO_DOM 141 146 Cytoplasmic. {ECO:0000255}.; TOPO_DOM 168 177 Extracellular. {ECO:0000255}.; TOPO_DOM 199 204 Cytoplasmic. {ECO:0000255}.; TOPO_DOM 226 243 Extracellular. {ECO:0000255}.; TOPO_DOM 265 357 Cytoplasmic. {ECO:0000255}.; TOPO_DOM 375 380 Extracellular. {ECO:0000255}.; TOPO_DOM 399 405 Cytoplasmi…	TRANSMEM 57 76 Helical; Name=1. {ECO:0000255}.; TRANSMEM 120 140 Helical; Name=2. {ECO:0000255}.; TRANSMEM 147 167 Helical; Name=3. {ECO:0000255}.; TRANSMEM 178 198 Helical; Name=4. {ECO:0000255}.; TRANSMEM 205 225 Helical; Name=5. {ECO:0000255}.; TRANSMEM 244 264 Helical; Name=6. {ECO:0000255}.; TRANSMEM 358 374 Helical; Name=7. {ECO:0000255}.; TRANSMEM 381 398 Helical; Name=8. {ECO:0000255}.; T…	integral component of membrane [GO:0016021]; plasma membrane [GO:0005886]; galactose transmembrane transporter activity [GO:0005354]; galactose transport [GO:0015757]; hexose transport [GO:0008645]	galactose transport [GO:0015757]; hexose transport [GO:0008645]	galactose transmembrane transporter activity [GO:0005354]	integral component of membrane [GO:0016021]; plasma membrane [GO:0005886]	GO:0005354; GO:0015757; GO:0008645; GO:0016021; GO:0005886							FUNCTION: Probable glucose transporter.		3 out of 5		35521;	DIP-8115N;	P42833;	MINT-1359436;
g3574.t1	GK5S-1386	-	3390:687-2587	GLC	XYL	OK	51.6094	96.6269	0.904792	1.65014	0.03205	0.162534	no	g3574.t1	Q9FVQ4	PLGG1_ARATH	reviewed	Plastidal glycolate/glycerate translocator 1, chloroplastic (Bacterial membrane protein LrgB-like protein) (AtLrgB)	PLGG1 At1g32080 F3C3.12 T12O21.2	Arabidopsis thaliana (Mouse-ear cress)	512	PLGG1		At1g32080	F3C3.12 T12O21.2		SUBCELLULAR LOCATION: Plastid, chloroplast membrane {ECO:0000305|PubMed:12766230, ECO:0000305|PubMed:23382251}; Multi-pass membrane protein {ECO:0000305|PubMed:12766230, ECO:0000305|PubMed:23382251}.			TRANSMEM 93 113 Helical. {ECO:0000255}.; TRANSMEM 127 147 Helical. {ECO:0000255}.; TRANSMEM 160 180 Helical. {ECO:0000255}.; TRANSMEM 195 215 Helical. {ECO:0000255}.; TRANSMEM 238 258 Helical. {ECO:0000255}.; TRANSMEM 270 290 Helical. {ECO:0000255}.; TRANSMEM 293 313 Helical. {ECO:0000255}.; TRANSMEM 336 356 Helical. {ECO:0000255}.; TRANSMEM 367 387 Helical. {ECO:0000255}.; TRANSMEM 398 418 Helic…	chloroplast [GO:0009507]; chloroplast envelope [GO:0009941]; chloroplast inner membrane [GO:0009706]; integral component of membrane [GO:0016021]; membrane [GO:0016020]; glycerate transmembrane transporter activity [GO:1901974]; glycolate transmembrane transporter activity [GO:0043879]; chloroplast organization [GO:0009658]; glycerate transmembrane transport [GO:1901975]; glycolate transmembrane …	chloroplast organization [GO:0009658]; glycerate transmembrane transport [GO:1901975]; glycolate transmembrane transport [GO:0097339]; photorespiration [GO:0009853]	glycerate transmembrane transporter activity [GO:1901974]; glycolate transmembrane transporter activity [GO:0043879]	chloroplast [GO:0009507]; chloroplast envelope [GO:0009941]; chloroplast inner membrane [GO:0009706]; integral component of membrane [GO:0016021]; membrane [GO:0016020]	GO:0009507; GO:0009941; GO:0009706; GO:0009658; GO:1901975; GO:1901974; GO:0097339; GO:0043879; GO:0016021; GO:0016020; GO:0009853							FUNCTION: Glycolate/glycerate transporter required for photorespiration. {ECO:0000269|PubMed:21916894, ECO:0000269|PubMed:22180599, ECO:0000269|PubMed:23382251}.		5 out of 5
g3632.t1	GK5S-1344	-	3435:75-957	GLC	XYL	OK	21.5625	36.4776	0.758487	1.25002	0.1541	0.423685	no	g3632.t1	P07921	LACP_KLULA	reviewed	Lactose permease	LAC12 KLLA0B14861g	Kluyveromyces lactis (strain ATCC 8585 / CBS 2359 / DSM 70799 / NBRC 1267 / NRRL Y-1140 / WM37) (Yeast) (Candida sphaerica)	587	LAC12		KLLA0B14861g			SUBCELLULAR LOCATION: Membrane; Multi-pass membrane protein.		TOPO_DOM 1 72 Cytoplasmic. {ECO:0000255}.; TOPO_DOM 94 116 Extracellular. {ECO:0000255}.; TOPO_DOM 138 143 Cytoplasmic. {ECO:0000255}.; TOPO_DOM 165 167 Extracellular. {ECO:0000255}.; TOPO_DOM 189 202 Cytoplasmic. {ECO:0000255}.; TOPO_DOM 224 237 Extracellular. {ECO:0000255}.; TOPO_DOM 259 330 Cytoplasmic. {ECO:0000255}.; TOPO_DOM 352 370 Extracellular. {ECO:0000255}.; TOPO_DOM 392 394 Cytoplasmi…	TRANSMEM 73 93 Helical; Name=1. {ECO:0000255}.; TRANSMEM 117 137 Helical; Name=2. {ECO:0000255}.; TRANSMEM 144 164 Helical; Name=3. {ECO:0000255}.; TRANSMEM 168 188 Helical; Name=4. {ECO:0000255}.; TRANSMEM 203 223 Helical; Name=5. {ECO:0000255}.; TRANSMEM 238 258 Helical; Name=6. {ECO:0000255}.; TRANSMEM 331 351 Helical; Name=7. {ECO:0000255}.; TRANSMEM 371 391 Helical; Name=8. {ECO:0000255}.; T…	integral component of membrane [GO:0016021]; substrate-specific transmembrane transporter activity [GO:0022891]; symporter activity [GO:0015293]; carbohydrate transport [GO:0008643]	carbohydrate transport [GO:0008643]	substrate-specific transmembrane transporter activity [GO:0022891]; symporter activity [GO:0015293]	integral component of membrane [GO:0016021]	GO:0008643; GO:0016021; GO:0022891; GO:0015293							FUNCTION: LAC12 mediates the transport of lactose and it would appear that the permease works in part by a proton symport mechanism.		3 out of 5
g2898.t1	GK5S-2085	-	2781:16146-17860	GLC	XYL	OK	27.0523	37.5626	0.473545	0.811471	0.29875	0.601285	no	g2898.t1	Q9XIH6	PLT2_ARATH	reviewed	Putative polyol transporter 2	PLT2 At2g16130 F7H1.15	Arabidopsis thaliana (Mouse-ear cress)	511	PLT2		At2g16130	F7H1.15		SUBCELLULAR LOCATION: Membrane {ECO:0000250}; Multi-pass membrane protein {ECO:0000250}.			TRANSMEM 25 45 Helical; Name=1. {ECO:0000255}.; TRANSMEM 63 83 Helical; Name=2. {ECO:0000255}.; TRANSMEM 94 114 Helical; Name=3. {ECO:0000255}.; TRANSMEM 117 137 Helical; Name=4. {ECO:0000255}.; TRANSMEM 156 176 Helical; Name=5. {ECO:0000255}.; TRANSMEM 186 206 Helical; Name=6. {ECO:0000255}.; TRANSMEM 284 304 Helical; Name=7. {ECO:0000255}.; TRANSMEM 324 344 Helical; Name=8. {ECO:0000255}.; TRAN…	integral component of plasma membrane [GO:0005887]; plasma membrane [GO:0005886]; glucose transmembrane transporter activity [GO:0005355]; sugar:proton symporter activity [GO:0005351]; glucose import [GO:0046323]; hexose transmembrane transport [GO:0035428]; proton transport [GO:0015992]	glucose import [GO:0046323]; hexose transmembrane transport [GO:0035428]; proton transport [GO:0015992]	glucose transmembrane transporter activity [GO:0005355]; sugar:proton symporter activity [GO:0005351]	integral component of plasma membrane [GO:0005887]; plasma membrane [GO:0005886]	GO:0046323; GO:0005355; GO:0035428; GO:0005887; GO:0005886; GO:0015992; GO:0005351							FUNCTION: Plasma membrane sugar-proton symporter. {ECO:0000250}.		2 out of 5
g2168.t1	GK5S-2837	-	2174:1981-2214	GLC	XYL	OK	926.12	1161.42	0.326617	1.60081	0.464	0.731671	no	g2168.t1	P53387	KHT2_KLULC	reviewed	Hexose transporter 2	KHT2	Kluyveromyces lactis (Yeast) (Candida sphaerica)	566	KHT2					SUBCELLULAR LOCATION: Membrane; Multi-pass membrane protein.		TOPO_DOM 22 61 Cytoplasmic. {ECO:0000255}.; TOPO_DOM 83 112 Extracellular. {ECO:0000255}.; TOPO_DOM 134 140 Cytoplasmic. {ECO:0000255}.; TOPO_DOM 162 166 Extracellular. {ECO:0000255}.; TOPO_DOM 188 198 Cytoplasmic. {ECO:0000255}.; TOPO_DOM 220 233 Extracellular. {ECO:0000255}.; TOPO_DOM 255 333 Cytoplasmic. {ECO:0000255}.; TOPO_DOM 354 357 Extracellular. {ECO:0000255}.; TOPO_DOM 379 385 Cytoplasm…	TRANSMEM 62 82 Helical; Name=1. {ECO:0000255}.; TRANSMEM 113 133 Helical; Name=2. {ECO:0000255}.; TRANSMEM 141 161 Helical; Name=3. {ECO:0000255}.; TRANSMEM 167 187 Helical; Name=4. {ECO:0000255}.; TRANSMEM 199 219 Helical; Name=5. {ECO:0000255}.; TRANSMEM 234 254 Helical; Name=6. {ECO:0000255}.; TRANSMEM 334 353 Helical; Name=7. {ECO:0000255}.; TRANSMEM 358 378 Helical; Name=8. {ECO:0000255}.; T…	integral component of membrane [GO:0016021]; substrate-specific transmembrane transporter activity [GO:0022891]; carbohydrate transport [GO:0008643]	carbohydrate transport [GO:0008643]	substrate-specific transmembrane transporter activity [GO:0022891]	integral component of membrane [GO:0016021]	GO:0008643; GO:0016021; GO:0022891							FUNCTION: Probable glucose transporter.		2 out of 5
g3882.t1	GK5S-1086	-	3780:5227-6995	GLC	XYL	OK	58.9394	70.8175	0.264873	0.487028	0.5219	0.767567	no	g3882.t1	P53154	GUP1_YEAST	reviewed	Glycerol uptake protein 1	GUP1 YGL084C	Saccharomyces cerevisiae (strain ATCC 204508 / S288c) (Baker's yeast)	560	GUP1		YGL084C			SUBCELLULAR LOCATION: Membrane {ECO:0000305}; Multi-pass membrane protein {ECO:0000305}.		TOPO_DOM 1 43 Cytoplasmic. {ECO:0000255}.; TOPO_DOM 65 101 Extracellular. {ECO:0000255}.; TOPO_DOM 123 131 Cytoplasmic. {ECO:0000255}.; TOPO_DOM 153 276 Extracellular. {ECO:0000255}.; TOPO_DOM 298 322 Cytoplasmic. {ECO:0000255}.; TOPO_DOM 344 352 Extracellular. {ECO:0000255}.; TOPO_DOM 374 432 Cytoplasmic. {ECO:0000255}.; TOPO_DOM 450 454 Extracellular. {ECO:0000255}.; TOPO_DOM 475 485 Cytoplasmi…	TRANSMEM 44 64 Helical. {ECO:0000255}.; TRANSMEM 102 122 Helical. {ECO:0000255}.; TRANSMEM 132 152 Helical. {ECO:0000255}.; TRANSMEM 277 297 Helical. {ECO:0000255}.; TRANSMEM 323 343 Helical. {ECO:0000255}.; TRANSMEM 353 373 Helical. {ECO:0000255}.; TRANSMEM 433 449 Helical. {ECO:0000255}.; TRANSMEM 455 474 Helical. {ECO:0000255}.; TRANSMEM 486 506 Helical. {ECO:0000255}.; TRANSMEM 527 547 Helica…	endoplasmic reticulum [GO:0005783]; integral component of membrane [GO:0016021]; membrane [GO:0016020]; plasma membrane [GO:0005886]; O-acyltransferase activity [GO:0008374]; symporter activity [GO:0015293]; glycerol catabolic process [GO:0019563]; glycerol transport [GO:0015793]; GPI anchor biosynthetic process [GO:0006506]	glycerol catabolic process [GO:0019563]; glycerol transport [GO:0015793]; GPI anchor biosynthetic process [GO:0006506]	O-acyltransferase activity [GO:0008374]; symporter activity [GO:0015293]	endoplasmic reticulum [GO:0005783]; integral component of membrane [GO:0016021]; membrane [GO:0016020]; plasma membrane [GO:0005886]	GO:0006506; GO:0008374; GO:0005783; GO:0019563; GO:0015793; GO:0016021; GO:0016020; GO:0005886; GO:0015293							FUNCTION: Involved in active uptake of glycerol driven by electrogenic proton symport. {ECO:0000269|PubMed:10931309}.		4 out of 5		33166;	DIP-4367N;	P53154;	MINT-561950;
g559.t1	GK5S-4461	-	632:3478-5234	GLC	XYL	OK	31.611	37.4537	0.244681	0.414027	0.58985	0.813969	no	g559.t1	Q04162	YD387_YEAST	reviewed	Probable metabolite transport protein YDR387C	YDR387C	Saccharomyces cerevisiae (strain ATCC 204508 / S288c) (Baker's yeast)	555			YDR387C			SUBCELLULAR LOCATION: Membrane; Multi-pass membrane protein.		TOPO_DOM 1 39 Cytoplasmic. {ECO:0000255}.; TOPO_DOM 61 83 Extracellular. {ECO:0000255}.; TOPO_DOM 105 118 Cytoplasmic. {ECO:0000255}.; TOPO_DOM 140 140 Extracellular. {ECO:0000255}.; TOPO_DOM 162 168 Cytoplasmic. {ECO:0000255}.; TOPO_DOM 190 200 Extracellular. {ECO:0000255}.; TOPO_DOM 222 356 Cytoplasmic. {ECO:0000255}.; TOPO_DOM 378 384 Extracellular. {ECO:0000255}.; TOPO_DOM 406 413 Cytoplasmic…	TRANSMEM 40 60 Helical. {ECO:0000255}.; TRANSMEM 84 104 Helical. {ECO:0000255}.; TRANSMEM 119 139 Helical. {ECO:0000255}.; TRANSMEM 141 161 Helical. {ECO:0000255}.; TRANSMEM 169 189 Helical. {ECO:0000255}.; TRANSMEM 201 221 Helical. {ECO:0000255}.; TRANSMEM 357 377 Helical. {ECO:0000255}.; TRANSMEM 385 405 Helical. {ECO:0000255}.; TRANSMEM 414 434 Helical. {ECO:0000255}.; TRANSMEM 441 461 Helical…	integral component of membrane [GO:0016021]; membrane [GO:0016020]; substrate-specific transmembrane transporter activity [GO:0022891]; carbohydrate transport [GO:0008643]; transmembrane transport [GO:0055085]; transport [GO:0006810]	carbohydrate transport [GO:0008643]; transmembrane transport [GO:0055085]; transport [GO:0006810]	substrate-specific transmembrane transporter activity [GO:0022891]	integral component of membrane [GO:0016021]; membrane [GO:0016020]	GO:0008643; GO:0016021; GO:0016020; GO:0022891; GO:0055085; GO:0006810									2 out of 5		32448;	DIP-4084N;		MINT-478807;
g2467.t1	GK5S-2523	-	2427:3073-4322	GLC	XYL	OK	44.5859	47.9554	0.105104	0.187985	0.81665	0.928233	no	g2467.t1	Q03697	YMD8_YEAST	reviewed	Putative nucleotide-sugar transporter YMD8	YMD8 YML038C	Saccharomyces cerevisiae (strain ATCC 204508 / S288c) (Baker's yeast)	442	YMD8		YML038C			SUBCELLULAR LOCATION: Golgi apparatus membrane {ECO:0000269|PubMed:14562095}; Multi-pass membrane protein {ECO:0000269|PubMed:14562095}. Cytoplasmic vesicle, COPI-coated vesicle membrane {ECO:0000269|PubMed:14562095}; Multi-pass membrane protein {ECO:0000269|PubMed:14562095}.		TOPO_DOM 1 3 Cytoplasmic. {ECO:0000255}.; TOPO_DOM 25 32 Extracellular. {ECO:0000255}.; TOPO_DOM 54 76 Cytoplasmic. {ECO:0000255}.; TOPO_DOM 98 107 Extracellular. {ECO:0000255}.; TOPO_DOM 129 132 Cytoplasmic. {ECO:0000255}.; TOPO_DOM 154 166 Extracellular. {ECO:0000255}.; TOPO_DOM 188 254 Cytoplasmic. {ECO:0000255}.; TOPO_DOM 276 301 Extracellular. {ECO:0000255}.; TOPO_DOM 323 329 Cytoplasmic. {E…	TRANSMEM 4 24 Helical. {ECO:0000255}.; TRANSMEM 33 53 Helical. {ECO:0000255}.; TRANSMEM 77 97 Helical. {ECO:0000255}.; TRANSMEM 108 128 Helical. {ECO:0000255}.; TRANSMEM 133 153 Helical. {ECO:0000255}.; TRANSMEM 167 187 Helical. {ECO:0000255}.; TRANSMEM 255 275 Helical. {ECO:0000255}.; TRANSMEM 302 322 Helical. {ECO:0000255}.; TRANSMEM 330 350 Helical. {ECO:0000255}.; TRANSMEM 356 376 Helical. {E…	COPI-coated vesicle membrane [GO:0030663]; integral component of membrane [GO:0016021]; nucleotide-sugar transmembrane transporter activity [GO:0005338]; carbohydrate transport [GO:0008643]; nucleotide transmembrane transport [GO:1901679]; nucleotide-sugar transport [GO:0015780]; UDP-glucose transport [GO:0015786]	carbohydrate transport [GO:0008643]; nucleotide-sugar transport [GO:0015780]; nucleotide transmembrane transport [GO:1901679]; UDP-glucose transport [GO:0015786]	nucleotide-sugar transmembrane transporter activity [GO:0005338]	COPI-coated vesicle membrane [GO:0030663]; integral component of membrane [GO:0016021]	GO:0030663; GO:0015786; GO:0008643; GO:0016021; GO:1901679; GO:0005338; GO:0015780									4 out of 5		35132;	DIP-1312N;	Q03697;	MINT-388216;
g1983.t1	GK5S-3024	-	2060:2600-2707	GLC	XYL	NOTEST	0	0	0	0	1	1	no	g1983.t1	P18631	RAG1_KLULA	reviewed	Low-affinity glucose transporter (Hexose transporter 1)	RAG1 KHT1 KLLA0D13310g	Kluyveromyces lactis (strain ATCC 8585 / CBS 2359 / DSM 70799 / NBRC 1267 / NRRL Y-1140 / WM37) (Yeast) (Candida sphaerica)	567	RAG1	KHT1	KLLA0D13310g			SUBCELLULAR LOCATION: Membrane; Multi-pass membrane protein.		TOPO_DOM 18 62 Cytoplasmic. {ECO:0000255}.; TOPO_DOM 84 113 Extracellular. {ECO:0000255}.; TOPO_DOM 135 141 Cytoplasmic. {ECO:0000255}.; TOPO_DOM 163 167 Extracellular. {ECO:0000255}.; TOPO_DOM 189 199 Cytoplasmic. {ECO:0000255}.; TOPO_DOM 221 234 Extracellular. {ECO:0000255}.; TOPO_DOM 256 334 Cytoplasmic. {ECO:0000255}.; TOPO_DOM 355 358 Extracellular. {ECO:0000255}.; TOPO_DOM 380 386 Cytoplasm…	TRANSMEM 63 83 Helical; Name=1. {ECO:0000255}.; TRANSMEM 114 134 Helical; Name=2. {ECO:0000255}.; TRANSMEM 142 162 Helical; Name=3. {ECO:0000255}.; TRANSMEM 168 188 Helical; Name=4. {ECO:0000255}.; TRANSMEM 200 220 Helical; Name=5. {ECO:0000255}.; TRANSMEM 235 255 Helical; Name=6. {ECO:0000255}.; TRANSMEM 335 354 Helical; Name=7. {ECO:0000255}.; TRANSMEM 359 379 Helical; Name=8. {ECO:0000255}.; T…	integral component of membrane [GO:0016021]; substrate-specific transmembrane transporter activity [GO:0022891]; carbohydrate transport [GO:0008643]	carbohydrate transport [GO:0008643]	substrate-specific transmembrane transporter activity [GO:0022891]	integral component of membrane [GO:0016021]	GO:0008643; GO:0016021; GO:0022891							FUNCTION: Low-affinity glucose transporter.		3 out of 5
g3156.t1	GK5S-1830	-	3024:29572-31001	GLC	XYL	OK	149.184	129.307	-0.206286	-0.387555	0.6187	0.827038	no	g3156.t1	P35198	MTH1_YEAST	reviewed	Protein MTH1	MTH1 YDR277C D9954.12	Saccharomyces cerevisiae (strain ATCC 204508 / S288c) (Baker's yeast)	433	MTH1		YDR277C	D9954.12						glucose transport [GO:0015758]; signal transduction [GO:0007165]	glucose transport [GO:0015758]; signal transduction [GO:0007165]			GO:0015758; GO:0007165									2 out of 5		32330;	DIP-803N;	P35198;	MINT-425217;
g1270.t1	GK5S-3744	-	1330:14378-15489	GLC	XYL	OK	36.9802	30.8688	-0.260603	-0.448583	0.59135	0.814469	no	g1270.t1	Q6CR04	HUT1_KLULA	reviewed	UDP-galactose transporter homolog 1	HUT1 KLLA0D12848g	Kluyveromyces lactis (strain ATCC 8585 / CBS 2359 / DSM 70799 / NBRC 1267 / NRRL Y-1140 / WM37) (Yeast) (Candida sphaerica)	339	HUT1		KLLA0D12848g			SUBCELLULAR LOCATION: Endoplasmic reticulum membrane {ECO:0000250}; Multi-pass membrane protein {ECO:0000250}.			TRANSMEM 5 25 Helical. {ECO:0000255}.; TRANSMEM 43 63 Helical. {ECO:0000255}.; TRANSMEM 91 111 Helical. {ECO:0000255}.; TRANSMEM 138 158 Helical. {ECO:0000255}.; TRANSMEM 171 191 Helical. {ECO:0000255}.; TRANSMEM 208 228 Helical. {ECO:0000255}.; TRANSMEM 246 268 Helical. {ECO:0000255}.; TRANSMEM 273 295 Helical. {ECO:0000255}.; TRANSMEM 301 321 Helical. {ECO:0000255}.	endoplasmic reticulum membrane [GO:0005789]; integral component of membrane [GO:0016021]; carbohydrate transport [GO:0008643]; transmembrane transport [GO:0055085]	carbohydrate transport [GO:0008643]; transmembrane transport [GO:0055085]		endoplasmic reticulum membrane [GO:0005789]; integral component of membrane [GO:0016021]	GO:0008643; GO:0005789; GO:0016021; GO:0055085							FUNCTION: May be involved in specific transport of UDP-Gal from the cytosol to the Golgi lumen. Involved in the maintenance of optimal conditions for the folding of secretory pathway proteins in the endoplasmic reticulum (By similarity). {ECO:0000250}.		2 out of 5
g3679.t1	GK5S-1293	-	3505:0-467	GLC	XYL	OK	34.8888	27.4665	-0.345088	-0.579298	0.59825	0.818584	no	g3679.t1	P07921	LACP_KLULA	reviewed	Lactose permease	LAC12 KLLA0B14861g	Kluyveromyces lactis (strain ATCC 8585 / CBS 2359 / DSM 70799 / NBRC 1267 / NRRL Y-1140 / WM37) (Yeast) (Candida sphaerica)	587	LAC12		KLLA0B14861g			SUBCELLULAR LOCATION: Membrane; Multi-pass membrane protein.		TOPO_DOM 1 72 Cytoplasmic. {ECO:0000255}.; TOPO_DOM 94 116 Extracellular. {ECO:0000255}.; TOPO_DOM 138 143 Cytoplasmic. {ECO:0000255}.; TOPO_DOM 165 167 Extracellular. {ECO:0000255}.; TOPO_DOM 189 202 Cytoplasmic. {ECO:0000255}.; TOPO_DOM 224 237 Extracellular. {ECO:0000255}.; TOPO_DOM 259 330 Cytoplasmic. {ECO:0000255}.; TOPO_DOM 352 370 Extracellular. {ECO:0000255}.; TOPO_DOM 392 394 Cytoplasmi…	TRANSMEM 73 93 Helical; Name=1. {ECO:0000255}.; TRANSMEM 117 137 Helical; Name=2. {ECO:0000255}.; TRANSMEM 144 164 Helical; Name=3. {ECO:0000255}.; TRANSMEM 168 188 Helical; Name=4. {ECO:0000255}.; TRANSMEM 203 223 Helical; Name=5. {ECO:0000255}.; TRANSMEM 238 258 Helical; Name=6. {ECO:0000255}.; TRANSMEM 331 351 Helical; Name=7. {ECO:0000255}.; TRANSMEM 371 391 Helical; Name=8. {ECO:0000255}.; T…	integral component of membrane [GO:0016021]; substrate-specific transmembrane transporter activity [GO:0022891]; symporter activity [GO:0015293]; carbohydrate transport [GO:0008643]	carbohydrate transport [GO:0008643]	substrate-specific transmembrane transporter activity [GO:0022891]; symporter activity [GO:0015293]	integral component of membrane [GO:0016021]	GO:0008643; GO:0016021; GO:0022891; GO:0015293							FUNCTION: LAC12 mediates the transport of lactose and it would appear that the permease works in part by a proton symport mechanism.		3 out of 5
g3549.t1	GK5S-1428	-	3339:44-835	GLC	XYL	OK	568.521	429.603	-0.404209	-0.810282	0.3545	0.643748	no	g3549.t1	P53387	KHT2_KLULC	reviewed	Hexose transporter 2	KHT2	Kluyveromyces lactis (Yeast) (Candida sphaerica)	566	KHT2					SUBCELLULAR LOCATION: Membrane; Multi-pass membrane protein.		TOPO_DOM 22 61 Cytoplasmic. {ECO:0000255}.; TOPO_DOM 83 112 Extracellular. {ECO:0000255}.; TOPO_DOM 134 140 Cytoplasmic. {ECO:0000255}.; TOPO_DOM 162 166 Extracellular. {ECO:0000255}.; TOPO_DOM 188 198 Cytoplasmic. {ECO:0000255}.; TOPO_DOM 220 233 Extracellular. {ECO:0000255}.; TOPO_DOM 255 333 Cytoplasmic. {ECO:0000255}.; TOPO_DOM 354 357 Extracellular. {ECO:0000255}.; TOPO_DOM 379 385 Cytoplasm…	TRANSMEM 62 82 Helical; Name=1. {ECO:0000255}.; TRANSMEM 113 133 Helical; Name=2. {ECO:0000255}.; TRANSMEM 141 161 Helical; Name=3. {ECO:0000255}.; TRANSMEM 167 187 Helical; Name=4. {ECO:0000255}.; TRANSMEM 199 219 Helical; Name=5. {ECO:0000255}.; TRANSMEM 234 254 Helical; Name=6. {ECO:0000255}.; TRANSMEM 334 353 Helical; Name=7. {ECO:0000255}.; TRANSMEM 358 378 Helical; Name=8. {ECO:0000255}.; T…	integral component of membrane [GO:0016021]; substrate-specific transmembrane transporter activity [GO:0022891]; carbohydrate transport [GO:0008643]	carbohydrate transport [GO:0008643]	substrate-specific transmembrane transporter activity [GO:0022891]	integral component of membrane [GO:0016021]	GO:0008643; GO:0016021; GO:0022891							FUNCTION: Probable glucose transporter.		2 out of 5
g4010.t1	GK5S-960	-	3954:0-413	GLC	XYL	OK	886.83	606.752	-0.547551	-1.37907	0.218	0.510567	no	g4010.t1	P53387	KHT2_KLULC	reviewed	Hexose transporter 2	KHT2	Kluyveromyces lactis (Yeast) (Candida sphaerica)	566	KHT2					SUBCELLULAR LOCATION: Membrane; Multi-pass membrane protein.		TOPO_DOM 22 61 Cytoplasmic. {ECO:0000255}.; TOPO_DOM 83 112 Extracellular. {ECO:0000255}.; TOPO_DOM 134 140 Cytoplasmic. {ECO:0000255}.; TOPO_DOM 162 166 Extracellular. {ECO:0000255}.; TOPO_DOM 188 198 Cytoplasmic. {ECO:0000255}.; TOPO_DOM 220 233 Extracellular. {ECO:0000255}.; TOPO_DOM 255 333 Cytoplasmic. {ECO:0000255}.; TOPO_DOM 354 357 Extracellular. {ECO:0000255}.; TOPO_DOM 379 385 Cytoplasm…	TRANSMEM 62 82 Helical; Name=1. {ECO:0000255}.; TRANSMEM 113 133 Helical; Name=2. {ECO:0000255}.; TRANSMEM 141 161 Helical; Name=3. {ECO:0000255}.; TRANSMEM 167 187 Helical; Name=4. {ECO:0000255}.; TRANSMEM 199 219 Helical; Name=5. {ECO:0000255}.; TRANSMEM 234 254 Helical; Name=6. {ECO:0000255}.; TRANSMEM 334 353 Helical; Name=7. {ECO:0000255}.; TRANSMEM 358 378 Helical; Name=8. {ECO:0000255}.; T…	integral component of membrane [GO:0016021]; substrate-specific transmembrane transporter activity [GO:0022891]; carbohydrate transport [GO:0008643]	carbohydrate transport [GO:0008643]	substrate-specific transmembrane transporter activity [GO:0022891]	integral component of membrane [GO:0016021]	GO:0008643; GO:0016021; GO:0022891							FUNCTION: Probable glucose transporter.		2 out of 5
g2065.t1	GK5S-2946	-	2107:14543-16233	GLC	XYL	OK	44.0747	29.9066	-0.559485	-0.959368	0.21805	0.510567	no	g2065.t1	P40913	RFT1_KLULA	reviewed	Oligosaccharide translocation protein RFT1	RFT1 KLLA0E10439g	Kluyveromyces lactis (strain ATCC 8585 / CBS 2359 / DSM 70799 / NBRC 1267 / NRRL Y-1140 / WM37) (Yeast) (Candida sphaerica)	556	RFT1		KLLA0E10439g			SUBCELLULAR LOCATION: Endoplasmic reticulum membrane {ECO:0000250}; Multi-pass membrane protein {ECO:0000250}.			TRANSMEM 11 31 Helical. {ECO:0000255}.; TRANSMEM 41 61 Helical. {ECO:0000255}.; TRANSMEM 97 117 Helical. {ECO:0000255}.; TRANSMEM 136 156 Helical. {ECO:0000255}.; TRANSMEM 172 192 Helical. {ECO:0000255}.; TRANSMEM 207 227 Helical. {ECO:0000255}.; TRANSMEM 300 320 Helical. {ECO:0000255}.; TRANSMEM 353 373 Helical. {ECO:0000255}.; TRANSMEM 394 414 Helical. {ECO:0000255}.; TRANSMEM 424 444 Helical. …	endoplasmic reticulum membrane [GO:0005789]; integral component of membrane [GO:0016021]; lipid transporter activity [GO:0005319]; carbohydrate transport [GO:0008643]	carbohydrate transport [GO:0008643]	lipid transporter activity [GO:0005319]	endoplasmic reticulum membrane [GO:0005789]; integral component of membrane [GO:0016021]	GO:0008643; GO:0005789; GO:0016021; GO:0005319							FUNCTION: May participate in the translocation of oligosaccharide from the cytoplasmic side to the lumenal side of the endoplasmic reticulum membrane. {ECO:0000250}.		2 out of 5
g1436.t1	GK5S-3565	-	1482:16137-17251	GLC	XYL	OK	56.0376	37.9831	-0.561038	-1.00239	0.2272	0.520176	no	g1436.t1	Q09875	YAGC_SCHPO	reviewed	Uncharacterized protein C12G12.12	SPAC12G12.12	Schizosaccharomyces pombe (strain 972 / ATCC 24843) (Fission yeast)	324				SPAC12G12.12		SUBCELLULAR LOCATION: Membrane {ECO:0000305}; Multi-pass membrane protein {ECO:0000305}.			TRANSMEM 34 54 Helical. {ECO:0000255}.; TRANSMEM 76 96 Helical. {ECO:0000255}.; TRANSMEM 103 123 Helical. {ECO:0000255}.; TRANSMEM 127 147 Helical. {ECO:0000255}.; TRANSMEM 158 178 Helical. {ECO:0000255}.; TRANSMEM 198 218 Helical. {ECO:0000255}.; TRANSMEM 243 263 Helical. {ECO:0000255}.; TRANSMEM 275 295 Helical. {ECO:0000255}.; TRANSMEM 297 317 Helical. {ECO:0000255}.	Golgi membrane [GO:0000139]; integral component of membrane [GO:0016021]; sugar:proton symporter activity [GO:0005351]; UDP-galactose transmembrane transporter activity [GO:0005459]; UDP-galactose transmembrane import into Golgi lumen [GO:0097624]	UDP-galactose transmembrane import into Golgi lumen [GO:0097624]	sugar:proton symporter activity [GO:0005351]; UDP-galactose transmembrane transporter activity [GO:0005459]	Golgi membrane [GO:0000139]; integral component of membrane [GO:0016021]	GO:0000139; GO:0097624; GO:0005459; GO:0016021; GO:0005351									2 out of 5		279359;
g2355.t1	GK5S-2642	-	2299:2127-2653	GLC	XYL	OK	503.399	330.588	-0.60667	-1.38092	0.17265	0.451187	no	g2355.t1	P53387	KHT2_KLULC	reviewed	Hexose transporter 2	KHT2	Kluyveromyces lactis (Yeast) (Candida sphaerica)	566	KHT2					SUBCELLULAR LOCATION: Membrane; Multi-pass membrane protein.		TOPO_DOM 22 61 Cytoplasmic. {ECO:0000255}.; TOPO_DOM 83 112 Extracellular. {ECO:0000255}.; TOPO_DOM 134 140 Cytoplasmic. {ECO:0000255}.; TOPO_DOM 162 166 Extracellular. {ECO:0000255}.; TOPO_DOM 188 198 Cytoplasmic. {ECO:0000255}.; TOPO_DOM 220 233 Extracellular. {ECO:0000255}.; TOPO_DOM 255 333 Cytoplasmic. {ECO:0000255}.; TOPO_DOM 354 357 Extracellular. {ECO:0000255}.; TOPO_DOM 379 385 Cytoplasm…	TRANSMEM 62 82 Helical; Name=1. {ECO:0000255}.; TRANSMEM 113 133 Helical; Name=2. {ECO:0000255}.; TRANSMEM 141 161 Helical; Name=3. {ECO:0000255}.; TRANSMEM 167 187 Helical; Name=4. {ECO:0000255}.; TRANSMEM 199 219 Helical; Name=5. {ECO:0000255}.; TRANSMEM 234 254 Helical; Name=6. {ECO:0000255}.; TRANSMEM 334 353 Helical; Name=7. {ECO:0000255}.; TRANSMEM 358 378 Helical; Name=8. {ECO:0000255}.; T…	integral component of membrane [GO:0016021]; substrate-specific transmembrane transporter activity [GO:0022891]; carbohydrate transport [GO:0008643]	carbohydrate transport [GO:0008643]	substrate-specific transmembrane transporter activity [GO:0022891]	integral component of membrane [GO:0016021]	GO:0008643; GO:0016021; GO:0022891							FUNCTION: Probable glucose transporter.		2 out of 5
g908.t1	GK5S-4111	-	977:1028-2040	GLC	XYL	OK	161.46	105.971	-0.607513	-1.22392	0.1436	0.4082	no	g908.t1	Q6CYD0	GMT_KLULA	reviewed	GDP-mannose transporter (GMT)	VRG4 KLLA0A01364g	Kluyveromyces lactis (strain ATCC 8585 / CBS 2359 / DSM 70799 / NBRC 1267 / NRRL Y-1140 / WM37) (Yeast) (Candida sphaerica)	330	VRG4		KLLA0A01364g			SUBCELLULAR LOCATION: Golgi apparatus membrane {ECO:0000250}; Multi-pass membrane protein {ECO:0000250}. Cytoplasmic vesicle membrane {ECO:0000250}; Multi-pass membrane protein {ECO:0000250}. Endoplasmic reticulum membrane {ECO:0000250}; Multi-pass membrane protein {ECO:0000250}.		TOPO_DOM 1 13 Cytoplasmic. {ECO:0000250}.; TOPO_DOM 35 48 Lumenal. {ECO:0000250}.; TOPO_DOM 70 81 Cytoplasmic. {ECO:0000250}.; TOPO_DOM 99 104 Lumenal. {ECO:0000250}.; TOPO_DOM 125 138 Cytoplasmic. {ECO:0000250}.; TOPO_DOM 156 170 Lumenal. {ECO:0000250}.; TOPO_DOM 192 203 Cytoplasmic. {ECO:0000250}.; TOPO_DOM 225 241 Lumenal. {ECO:0000250}.; TOPO_DOM 263 269 Cytoplasmic. {ECO:0000250}.; TOPO_DOM …	TRANSMEM 14 34 Helical. {ECO:0000255}.; TRANSMEM 49 69 Helical. {ECO:0000255}.; TRANSMEM 82 98 Helical. {ECO:0000255}.; TRANSMEM 105 124 Helical. {ECO:0000255}.; TRANSMEM 139 155 Helical. {ECO:0000255}.; TRANSMEM 171 191 Helical. {ECO:0000255}.; TRANSMEM 204 224 Helical. {ECO:0000255}.; TRANSMEM 242 262 Helical. {ECO:0000255}.; TRANSMEM 270 290 Helical. {ECO:0000255}.; TRANSMEM 295 315 Helical. {…	cytoplasmic vesicle membrane [GO:0030659]; endoplasmic reticulum membrane [GO:0005789]; Golgi membrane [GO:0000139]; integral component of membrane [GO:0016021]; nucleotide-sugar transmembrane transporter activity [GO:0005338]; carbohydrate transport [GO:0008643]; nucleotide-sugar transport [GO:0015780]	carbohydrate transport [GO:0008643]; nucleotide-sugar transport [GO:0015780]	nucleotide-sugar transmembrane transporter activity [GO:0005338]	cytoplasmic vesicle membrane [GO:0030659]; endoplasmic reticulum membrane [GO:0005789]; Golgi membrane [GO:0000139]; integral component of membrane [GO:0016021]	GO:0000139; GO:0008643; GO:0030659; GO:0005789; GO:0016021; GO:0005338; GO:0015780							FUNCTION: Involved in the import of GDP-mannose from the cytoplasm into the Golgi lumen. {ECO:0000250}.		3 out of 5
g3859.t1	GK5S-1113	-	3725:0-214	GLC	XYL	OK	3260.16	2139.32	-0.607787	-3.83612	0.13885	0.399289	no	g3859.t1	P53387	KHT2_KLULC	reviewed	Hexose transporter 2	KHT2	Kluyveromyces lactis (Yeast) (Candida sphaerica)	566	KHT2					SUBCELLULAR LOCATION: Membrane; Multi-pass membrane protein.		TOPO_DOM 22 61 Cytoplasmic. {ECO:0000255}.; TOPO_DOM 83 112 Extracellular. {ECO:0000255}.; TOPO_DOM 134 140 Cytoplasmic. {ECO:0000255}.; TOPO_DOM 162 166 Extracellular. {ECO:0000255}.; TOPO_DOM 188 198 Cytoplasmic. {ECO:0000255}.; TOPO_DOM 220 233 Extracellular. {ECO:0000255}.; TOPO_DOM 255 333 Cytoplasmic. {ECO:0000255}.; TOPO_DOM 354 357 Extracellular. {ECO:0000255}.; TOPO_DOM 379 385 Cytoplasm…	TRANSMEM 62 82 Helical; Name=1. {ECO:0000255}.; TRANSMEM 113 133 Helical; Name=2. {ECO:0000255}.; TRANSMEM 141 161 Helical; Name=3. {ECO:0000255}.; TRANSMEM 167 187 Helical; Name=4. {ECO:0000255}.; TRANSMEM 199 219 Helical; Name=5. {ECO:0000255}.; TRANSMEM 234 254 Helical; Name=6. {ECO:0000255}.; TRANSMEM 334 353 Helical; Name=7. {ECO:0000255}.; TRANSMEM 358 378 Helical; Name=8. {ECO:0000255}.; T…	integral component of membrane [GO:0016021]; substrate-specific transmembrane transporter activity [GO:0022891]; carbohydrate transport [GO:0008643]	carbohydrate transport [GO:0008643]	substrate-specific transmembrane transporter activity [GO:0022891]	integral component of membrane [GO:0016021]	GO:0008643; GO:0016021; GO:0022891							FUNCTION: Probable glucose transporter.		2 out of 5
g4011.t1	GK5S-961	-	3954:2486-2725	GLC	XYL	OK	4567.84	2904.49	-0.653226	-2.98684	0.12995	0.38332	no	g4011.t1	P53387	KHT2_KLULC	reviewed	Hexose transporter 2	KHT2	Kluyveromyces lactis (Yeast) (Candida sphaerica)	566	KHT2					SUBCELLULAR LOCATION: Membrane; Multi-pass membrane protein.		TOPO_DOM 22 61 Cytoplasmic. {ECO:0000255}.; TOPO_DOM 83 112 Extracellular. {ECO:0000255}.; TOPO_DOM 134 140 Cytoplasmic. {ECO:0000255}.; TOPO_DOM 162 166 Extracellular. {ECO:0000255}.; TOPO_DOM 188 198 Cytoplasmic. {ECO:0000255}.; TOPO_DOM 220 233 Extracellular. {ECO:0000255}.; TOPO_DOM 255 333 Cytoplasmic. {ECO:0000255}.; TOPO_DOM 354 357 Extracellular. {ECO:0000255}.; TOPO_DOM 379 385 Cytoplasm…	TRANSMEM 62 82 Helical; Name=1. {ECO:0000255}.; TRANSMEM 113 133 Helical; Name=2. {ECO:0000255}.; TRANSMEM 141 161 Helical; Name=3. {ECO:0000255}.; TRANSMEM 167 187 Helical; Name=4. {ECO:0000255}.; TRANSMEM 199 219 Helical; Name=5. {ECO:0000255}.; TRANSMEM 234 254 Helical; Name=6. {ECO:0000255}.; TRANSMEM 334 353 Helical; Name=7. {ECO:0000255}.; TRANSMEM 358 378 Helical; Name=8. {ECO:0000255}.; T…	integral component of membrane [GO:0016021]; substrate-specific transmembrane transporter activity [GO:0022891]; carbohydrate transport [GO:0008643]	carbohydrate transport [GO:0008643]	substrate-specific transmembrane transporter activity [GO:0022891]	integral component of membrane [GO:0016021]	GO:0008643; GO:0016021; GO:0022891							FUNCTION: Probable glucose transporter.		2 out of 5
g2114.t1	GK5S-2891	-	2132:15-122	GLC	XYL	OK	12080.4	7578.59	-0.672668	-37.8833	0.22645	0.519243	no	g2114.t1	P39004	HXT7_YEAST	reviewed	High-affinity hexose transporter HXT6	HXT7 YDR342C D9651.11	Saccharomyces cerevisiae (strain ATCC 204508 / S288c) (Baker's yeast)	570	HXT7		YDR342C	D9651.11		SUBCELLULAR LOCATION: Membrane; Multi-pass membrane protein.		TOPO_DOM 1 60 Cytoplasmic. {ECO:0000255}.; TOPO_DOM 82 116 Extracellular. {ECO:0000255}.; TOPO_DOM 138 143 Cytoplasmic. {ECO:0000255}.; TOPO_DOM 165 174 Extracellular. {ECO:0000255}.; TOPO_DOM 196 201 Cytoplasmic. {ECO:0000255}.; TOPO_DOM 223 236 Extracellular. {ECO:0000255}.; TOPO_DOM 258 340 Cytoplasmic. {ECO:0000255}.; TOPO_DOM 358 363 Extracellular. {ECO:0000255}.; TOPO_DOM 382 388 Cytoplasmi…	TRANSMEM 61 81 Helical; Name=1. {ECO:0000255}.; TRANSMEM 117 137 Helical; Name=2. {ECO:0000255}.; TRANSMEM 144 164 Helical; Name=3. {ECO:0000255}.; TRANSMEM 175 195 Helical; Name=4. {ECO:0000255}.; TRANSMEM 202 222 Helical; Name=5. {ECO:0000255}.; TRANSMEM 237 257 Helical; Name=6. {ECO:0000255}.; TRANSMEM 341 357 Helical; Name=7. {ECO:0000255}.; TRANSMEM 364 381 Helical; Name=8. {ECO:0000255}.; T…	integral component of membrane [GO:0016021]; plasma membrane [GO:0005886]; fructose transmembrane transporter activity [GO:0005353]; glucose transmembrane transporter activity [GO:0005355]; mannose transmembrane transporter activity [GO:0015578]; pentose transmembrane transporter activity [GO:0015146]; fructose transport [GO:0015755]; glucose transport [GO:0015758]; hexose transport [GO:0008645];…	fructose transport [GO:0015755]; glucose transport [GO:0015758]; hexose transport [GO:0008645]; mannose transport [GO:0015761]; pentose transport [GO:0015750]; transmembrane transport [GO:0055085]	fructose transmembrane transporter activity [GO:0005353]; glucose transmembrane transporter activity [GO:0005355]; mannose transmembrane transporter activity [GO:0015578]; pentose transmembrane transporter activity [GO:0015146]	integral component of membrane [GO:0016021]; plasma membrane [GO:0005886]	GO:0005353; GO:0015755; GO:0005355; GO:0015758; GO:0008645; GO:0016021; GO:0015578; GO:0015761; GO:0015146; GO:0015750; GO:0005886; GO:0055085							FUNCTION: High-affinity glucose transporter.		5 out of 5		32399;	DIP-5182N;	P39004;	MINT-553106;
g3955.t1	GK5S-1015	-	3867:508-2225	GLC	XYL	OK	46.9799	28.306	-0.730935	-1.27561	0.1012	0.332565	no	g3955.t1	P23900	FPS1_YEAST	reviewed	Glycerol uptake/efflux facilitator protein	FPS1 YLL043W	Saccharomyces cerevisiae (strain ATCC 204508 / S288c) (Baker's yeast)	669	FPS1		YLL043W			SUBCELLULAR LOCATION: Membrane {ECO:0000305}; Multi-pass membrane protein {ECO:0000305}.		TOPO_DOM 1 254 Extracellular. {ECO:0000255}.; TOPO_DOM 276 325 Cytoplasmic. {ECO:0000255}.; TOPO_DOM 347 369 Extracellular. {ECO:0000255}.; TOPO_DOM 391 446 Cytoplasmic. {ECO:0000255}.; TOPO_DOM 468 506 Extracellular. {ECO:0000255}.; TOPO_DOM 528 669 Cytoplasmic. {ECO:0000255}.	TRANSMEM 255 275 Helical. {ECO:0000255}.; TRANSMEM 326 346 Helical. {ECO:0000255}.; TRANSMEM 370 390 Helical. {ECO:0000255}.; TRANSMEM 447 467 Helical. {ECO:0000255}.; TRANSMEM 507 527 Helical. {ECO:0000255}.	integral component of membrane [GO:0016021]; plasma membrane [GO:0005886]; glycerol channel activity [GO:0015254]; glycerol transmembrane transporter activity [GO:0015168]; transporter activity [GO:0005215]; acetate transport [GO:0006846]; arsenite transport [GO:0015700]; conjugation with cellular fusion [GO:0000747]; glycerol metabolic process [GO:0006071]; glycerol transport [GO:0015793]; polyo…	acetate transport [GO:0006846]; arsenite transport [GO:0015700]; conjugation with cellular fusion [GO:0000747]; glycerol metabolic process [GO:0006071]; glycerol transport [GO:0015793]; polyol transport [GO:0015791]; response to arsenic-containing substance [GO:0046685]	glycerol channel activity [GO:0015254]; glycerol transmembrane transporter activity [GO:0015168]; transporter activity [GO:0005215]	integral component of membrane [GO:0016021]; plasma membrane [GO:0005886]	GO:0006846; GO:0015700; GO:0000747; GO:0015254; GO:0006071; GO:0015168; GO:0015793; GO:0016021; GO:0005886; GO:0015791; GO:0046685; GO:0005215	DOMAIN: Aquaporins contain two tandem repeats each containing three membrane-spanning domains and a pore-forming loop with the signature motif Asn-Pro/Leu-Ala/Ser (NPA).		MOTIF 352 354 NPA 1.; MOTIF 480 482 NPA 2.				FUNCTION: Channel protein for glycerol. Has a role in both glycerol influx and efflux. Plays a role in osmoregulation: under osmotic stress the channel is apparently closed to allow accumulation of glycerol in the cell under hyperosmotic conditions.		5 out of 5		31270;	DIP-3979N;	P23900;	MINT-557848;
g3805.t1	GK5S-1168	-	3627:0-159	GLC	XYL	OK	4464.16	2561.52	-0.801389	-10.0726	0.0763	0.284742	no	g3805.t1	P18631	RAG1_KLULA	reviewed	Low-affinity glucose transporter (Hexose transporter 1)	RAG1 KHT1 KLLA0D13310g	Kluyveromyces lactis (strain ATCC 8585 / CBS 2359 / DSM 70799 / NBRC 1267 / NRRL Y-1140 / WM37) (Yeast) (Candida sphaerica)	567	RAG1	KHT1	KLLA0D13310g			SUBCELLULAR LOCATION: Membrane; Multi-pass membrane protein.		TOPO_DOM 18 62 Cytoplasmic. {ECO:0000255}.; TOPO_DOM 84 113 Extracellular. {ECO:0000255}.; TOPO_DOM 135 141 Cytoplasmic. {ECO:0000255}.; TOPO_DOM 163 167 Extracellular. {ECO:0000255}.; TOPO_DOM 189 199 Cytoplasmic. {ECO:0000255}.; TOPO_DOM 221 234 Extracellular. {ECO:0000255}.; TOPO_DOM 256 334 Cytoplasmic. {ECO:0000255}.; TOPO_DOM 355 358 Extracellular. {ECO:0000255}.; TOPO_DOM 380 386 Cytoplasm…	TRANSMEM 63 83 Helical; Name=1. {ECO:0000255}.; TRANSMEM 114 134 Helical; Name=2. {ECO:0000255}.; TRANSMEM 142 162 Helical; Name=3. {ECO:0000255}.; TRANSMEM 168 188 Helical; Name=4. {ECO:0000255}.; TRANSMEM 200 220 Helical; Name=5. {ECO:0000255}.; TRANSMEM 235 255 Helical; Name=6. {ECO:0000255}.; TRANSMEM 335 354 Helical; Name=7. {ECO:0000255}.; TRANSMEM 359 379 Helical; Name=8. {ECO:0000255}.; T…	integral component of membrane [GO:0016021]; substrate-specific transmembrane transporter activity [GO:0022891]; carbohydrate transport [GO:0008643]	carbohydrate transport [GO:0008643]	substrate-specific transmembrane transporter activity [GO:0022891]	integral component of membrane [GO:0016021]	GO:0008643; GO:0016021; GO:0022891							FUNCTION: Low-affinity glucose transporter.		3 out of 5
g4477.t1	GK5S-490	-	4487:0-412	GLC	XYL	OK	7836.83	4305.96	-0.863934	-2.20899	0.05345	0.226331	no	g4477.t1	P53387	KHT2_KLULC	reviewed	Hexose transporter 2	KHT2	Kluyveromyces lactis (Yeast) (Candida sphaerica)	566	KHT2					SUBCELLULAR LOCATION: Membrane; Multi-pass membrane protein.		TOPO_DOM 22 61 Cytoplasmic. {ECO:0000255}.; TOPO_DOM 83 112 Extracellular. {ECO:0000255}.; TOPO_DOM 134 140 Cytoplasmic. {ECO:0000255}.; TOPO_DOM 162 166 Extracellular. {ECO:0000255}.; TOPO_DOM 188 198 Cytoplasmic. {ECO:0000255}.; TOPO_DOM 220 233 Extracellular. {ECO:0000255}.; TOPO_DOM 255 333 Cytoplasmic. {ECO:0000255}.; TOPO_DOM 354 357 Extracellular. {ECO:0000255}.; TOPO_DOM 379 385 Cytoplasm…	TRANSMEM 62 82 Helical; Name=1. {ECO:0000255}.; TRANSMEM 113 133 Helical; Name=2. {ECO:0000255}.; TRANSMEM 141 161 Helical; Name=3. {ECO:0000255}.; TRANSMEM 167 187 Helical; Name=4. {ECO:0000255}.; TRANSMEM 199 219 Helical; Name=5. {ECO:0000255}.; TRANSMEM 234 254 Helical; Name=6. {ECO:0000255}.; TRANSMEM 334 353 Helical; Name=7. {ECO:0000255}.; TRANSMEM 358 378 Helical; Name=8. {ECO:0000255}.; T…	integral component of membrane [GO:0016021]; substrate-specific transmembrane transporter activity [GO:0022891]; carbohydrate transport [GO:0008643]	carbohydrate transport [GO:0008643]	substrate-specific transmembrane transporter activity [GO:0022891]	integral component of membrane [GO:0016021]	GO:0008643; GO:0016021; GO:0022891							FUNCTION: Probable glucose transporter.		2 out of 5
g4460.t1	GK5S-509	-	4460:0-306	GLC	XYL	OK	1341.61	729.763	-0.878463	-3.22341	0.03465	0.171823	no	g4460.t1	P53387	KHT2_KLULC	reviewed	Hexose transporter 2	KHT2	Kluyveromyces lactis (Yeast) (Candida sphaerica)	566	KHT2					SUBCELLULAR LOCATION: Membrane; Multi-pass membrane protein.		TOPO_DOM 22 61 Cytoplasmic. {ECO:0000255}.; TOPO_DOM 83 112 Extracellular. {ECO:0000255}.; TOPO_DOM 134 140 Cytoplasmic. {ECO:0000255}.; TOPO_DOM 162 166 Extracellular. {ECO:0000255}.; TOPO_DOM 188 198 Cytoplasmic. {ECO:0000255}.; TOPO_DOM 220 233 Extracellular. {ECO:0000255}.; TOPO_DOM 255 333 Cytoplasmic. {ECO:0000255}.; TOPO_DOM 354 357 Extracellular. {ECO:0000255}.; TOPO_DOM 379 385 Cytoplasm…	TRANSMEM 62 82 Helical; Name=1. {ECO:0000255}.; TRANSMEM 113 133 Helical; Name=2. {ECO:0000255}.; TRANSMEM 141 161 Helical; Name=3. {ECO:0000255}.; TRANSMEM 167 187 Helical; Name=4. {ECO:0000255}.; TRANSMEM 199 219 Helical; Name=5. {ECO:0000255}.; TRANSMEM 234 254 Helical; Name=6. {ECO:0000255}.; TRANSMEM 334 353 Helical; Name=7. {ECO:0000255}.; TRANSMEM 358 378 Helical; Name=8. {ECO:0000255}.; T…	integral component of membrane [GO:0016021]; substrate-specific transmembrane transporter activity [GO:0022891]; carbohydrate transport [GO:0008643]	carbohydrate transport [GO:0008643]	substrate-specific transmembrane transporter activity [GO:0022891]	integral component of membrane [GO:0016021]	GO:0008643; GO:0016021; GO:0022891							FUNCTION: Probable glucose transporter.		2 out of 5
g2354.t1	GK5S-2641	-	2299:0-149	GLC	XYL	OK	1161.66	524.312	-1.14769	-12.5357	0.0726	0.27628	no	g2354.t1	P18631	RAG1_KLULA	reviewed	Low-affinity glucose transporter (Hexose transporter 1)	RAG1 KHT1 KLLA0D13310g	Kluyveromyces lactis (strain ATCC 8585 / CBS 2359 / DSM 70799 / NBRC 1267 / NRRL Y-1140 / WM37) (Yeast) (Candida sphaerica)	567	RAG1	KHT1	KLLA0D13310g			SUBCELLULAR LOCATION: Membrane; Multi-pass membrane protein.		TOPO_DOM 18 62 Cytoplasmic. {ECO:0000255}.; TOPO_DOM 84 113 Extracellular. {ECO:0000255}.; TOPO_DOM 135 141 Cytoplasmic. {ECO:0000255}.; TOPO_DOM 163 167 Extracellular. {ECO:0000255}.; TOPO_DOM 189 199 Cytoplasmic. {ECO:0000255}.; TOPO_DOM 221 234 Extracellular. {ECO:0000255}.; TOPO_DOM 256 334 Cytoplasmic. {ECO:0000255}.; TOPO_DOM 355 358 Extracellular. {ECO:0000255}.; TOPO_DOM 380 386 Cytoplasm…	TRANSMEM 63 83 Helical; Name=1. {ECO:0000255}.; TRANSMEM 114 134 Helical; Name=2. {ECO:0000255}.; TRANSMEM 142 162 Helical; Name=3. {ECO:0000255}.; TRANSMEM 168 188 Helical; Name=4. {ECO:0000255}.; TRANSMEM 200 220 Helical; Name=5. {ECO:0000255}.; TRANSMEM 235 255 Helical; Name=6. {ECO:0000255}.; TRANSMEM 335 354 Helical; Name=7. {ECO:0000255}.; TRANSMEM 359 379 Helical; Name=8. {ECO:0000255}.; T…	integral component of membrane [GO:0016021]; substrate-specific transmembrane transporter activity [GO:0022891]; carbohydrate transport [GO:0008643]	carbohydrate transport [GO:0008643]	substrate-specific transmembrane transporter activity [GO:0022891]	integral component of membrane [GO:0016021]	GO:0008643; GO:0016021; GO:0022891							FUNCTION: Low-affinity glucose transporter.		3 out of 5
g4459.t1	GK5S-510	-	4459:0-306	GLC	XYL	OK	6244.68	2813.96	-1.15003	-4.06525	0.007	0.0542442	no	g4459.t1	P53387	KHT2_KLULC	reviewed	Hexose transporter 2	KHT2	Kluyveromyces lactis (Yeast) (Candida sphaerica)	566	KHT2					SUBCELLULAR LOCATION: Membrane; Multi-pass membrane protein.		TOPO_DOM 22 61 Cytoplasmic. {ECO:0000255}.; TOPO_DOM 83 112 Extracellular. {ECO:0000255}.; TOPO_DOM 134 140 Cytoplasmic. {ECO:0000255}.; TOPO_DOM 162 166 Extracellular. {ECO:0000255}.; TOPO_DOM 188 198 Cytoplasmic. {ECO:0000255}.; TOPO_DOM 220 233 Extracellular. {ECO:0000255}.; TOPO_DOM 255 333 Cytoplasmic. {ECO:0000255}.; TOPO_DOM 354 357 Extracellular. {ECO:0000255}.; TOPO_DOM 379 385 Cytoplasm…	TRANSMEM 62 82 Helical; Name=1. {ECO:0000255}.; TRANSMEM 113 133 Helical; Name=2. {ECO:0000255}.; TRANSMEM 141 161 Helical; Name=3. {ECO:0000255}.; TRANSMEM 167 187 Helical; Name=4. {ECO:0000255}.; TRANSMEM 199 219 Helical; Name=5. {ECO:0000255}.; TRANSMEM 234 254 Helical; Name=6. {ECO:0000255}.; TRANSMEM 334 353 Helical; Name=7. {ECO:0000255}.; TRANSMEM 358 378 Helical; Name=8. {ECO:0000255}.; T…	integral component of membrane [GO:0016021]; substrate-specific transmembrane transporter activity [GO:0022891]; carbohydrate transport [GO:0008643]	carbohydrate transport [GO:0008643]	substrate-specific transmembrane transporter activity [GO:0022891]	integral component of membrane [GO:0016021]	GO:0008643; GO:0016021; GO:0022891							FUNCTION: Probable glucose transporter.		2 out of 5
g2869.t1	GK5S-2113	-	2767:0-313	GLC	XYL	OK	1833.15	767.205	-1.25664	-4.52862	0.00205	0.0220798	yes	g2869.t1	P53387	KHT2_KLULC	reviewed	Hexose transporter 2	KHT2	Kluyveromyces lactis (Yeast) (Candida sphaerica)	566	KHT2					SUBCELLULAR LOCATION: Membrane; Multi-pass membrane protein.		TOPO_DOM 22 61 Cytoplasmic. {ECO:0000255}.; TOPO_DOM 83 112 Extracellular. {ECO:0000255}.; TOPO_DOM 134 140 Cytoplasmic. {ECO:0000255}.; TOPO_DOM 162 166 Extracellular. {ECO:0000255}.; TOPO_DOM 188 198 Cytoplasmic. {ECO:0000255}.; TOPO_DOM 220 233 Extracellular. {ECO:0000255}.; TOPO_DOM 255 333 Cytoplasmic. {ECO:0000255}.; TOPO_DOM 354 357 Extracellular. {ECO:0000255}.; TOPO_DOM 379 385 Cytoplasm…	TRANSMEM 62 82 Helical; Name=1. {ECO:0000255}.; TRANSMEM 113 133 Helical; Name=2. {ECO:0000255}.; TRANSMEM 141 161 Helical; Name=3. {ECO:0000255}.; TRANSMEM 167 187 Helical; Name=4. {ECO:0000255}.; TRANSMEM 199 219 Helical; Name=5. {ECO:0000255}.; TRANSMEM 234 254 Helical; Name=6. {ECO:0000255}.; TRANSMEM 334 353 Helical; Name=7. {ECO:0000255}.; TRANSMEM 358 378 Helical; Name=8. {ECO:0000255}.; T…	integral component of membrane [GO:0016021]; substrate-specific transmembrane transporter activity [GO:0022891]; carbohydrate transport [GO:0008643]	carbohydrate transport [GO:0008643]	substrate-specific transmembrane transporter activity [GO:0022891]	integral component of membrane [GO:0016021]	GO:0008643; GO:0016021; GO:0022891							FUNCTION: Probable glucose transporter.		2 out of 5
g1118.t1	GK5S-3901	-	1230:42-340	GLC	XYL	OK	9803.56	2965.83	-1.72487	-6.07371	0.00025	0.00390033	yes	g1118.t1	P39003	HXT6_YEAST	reviewed	High-affinity hexose transporter HXT6	HXT6 YDR343C D9651.12	Saccharomyces cerevisiae (strain ATCC 204508 / S288c) (Baker's yeast)	570	HXT6		YDR343C	D9651.12		SUBCELLULAR LOCATION: Membrane; Multi-pass membrane protein.		TOPO_DOM 1 60 Cytoplasmic. {ECO:0000255}.; TOPO_DOM 82 116 Extracellular. {ECO:0000255}.; TOPO_DOM 138 143 Cytoplasmic. {ECO:0000255}.; TOPO_DOM 165 174 Extracellular. {ECO:0000255}.; TOPO_DOM 196 201 Cytoplasmic. {ECO:0000255}.; TOPO_DOM 223 236 Extracellular. {ECO:0000255}.; TOPO_DOM 258 340 Cytoplasmic. {ECO:0000255}.; TOPO_DOM 358 363 Extracellular. {ECO:0000255}.; TOPO_DOM 382 388 Cytoplasmi…	TRANSMEM 61 81 Helical; Name=1. {ECO:0000255}.; TRANSMEM 117 137 Helical; Name=2. {ECO:0000255}.; TRANSMEM 144 164 Helical; Name=3. {ECO:0000255}.; TRANSMEM 175 195 Helical; Name=4. {ECO:0000255}.; TRANSMEM 202 222 Helical; Name=5. {ECO:0000255}.; TRANSMEM 237 257 Helical; Name=6. {ECO:0000255}.; TRANSMEM 341 357 Helical; Name=7. {ECO:0000255}.; TRANSMEM 364 381 Helical; Name=8. {ECO:0000255}.; T…	integral component of membrane [GO:0016021]; plasma membrane [GO:0005886]; fructose transmembrane transporter activity [GO:0005353]; glucose transmembrane transporter activity [GO:0005355]; mannose transmembrane transporter activity [GO:0015578]; fructose transport [GO:0015755]; glucose transport [GO:0015758]; hexose transport [GO:0008645]; mannose transport [GO:0015761]; transmembrane transport …	fructose transport [GO:0015755]; glucose transport [GO:0015758]; hexose transport [GO:0008645]; mannose transport [GO:0015761]; transmembrane transport [GO:0055085]	fructose transmembrane transporter activity [GO:0005353]; glucose transmembrane transporter activity [GO:0005355]; mannose transmembrane transporter activity [GO:0015578]	integral component of membrane [GO:0016021]; plasma membrane [GO:0005886]	GO:0005353; GO:0015755; GO:0005355; GO:0015758; GO:0008645; GO:0016021; GO:0015578; GO:0015761; GO:0005886; GO:0055085							FUNCTION: High-affinity glucose transporter.		5 out of 5		32400;	DIP-5372N;	P39003;	MINT-563331;
g3.t1	GK5S-5030	-	3:2815-4250	GLC	XYL	OK	621.478	134.62	-2.20681	-4.06545	5e-05	0.00100773	yes	g3.t1	Q12505	SKS1_YEAST	reviewed	Serine/threonine-protein kinase SKS1 (EC 2.7.11.1) (Suppressor kinase of SNF3)	SKS1 SHA3 YPL026C LPB5	Saccharomyces cerevisiae (strain ATCC 204508 / S288c) (Baker's yeast)	502	SKS1	SHA3	YPL026C	LPB5	2.7.11.1					nucleus [GO:0005634]; ATP binding [GO:0005524]; protein serine/threonine kinase activity [GO:0004674]; glucose transport [GO:0015758]; positive regulation of transcription from RNA polymerase II promoter [GO:0045944]; protein phosphorylation [GO:0006468]; pseudohyphal growth [GO:0007124]; response to glucose [GO:0009749]	glucose transport [GO:0015758]; positive regulation of transcription from RNA polymerase II promoter [GO:0045944]; protein phosphorylation [GO:0006468]; pseudohyphal growth [GO:0007124]; response to glucose [GO:0009749]	ATP binding [GO:0005524]; protein serine/threonine kinase activity [GO:0004674]	nucleus [GO:0005634]	GO:0005524; GO:0015758; GO:0005634; GO:0045944; GO:0006468; GO:0004674; GO:0007124; GO:0009749		DOMAIN 10 338 Protein kinase. {ECO:0000255|PROSITE-ProRule:PRU00159}.					FUNCTION: May have a role in glucose regulation.		5 out of 5		36152;	DIP-2879N;	Q12505;	MINT-504867;
g3573.t1	GK5S-1404	-	3383:0-783	GLC	XYL	OK	2658.25	334.313	-2.9912	-6.32752	5e-05	0.00100773	yes	g3573.t1	P18631	RAG1_KLULA	reviewed	Low-affinity glucose transporter (Hexose transporter 1)	RAG1 KHT1 KLLA0D13310g	Kluyveromyces lactis (strain ATCC 8585 / CBS 2359 / DSM 70799 / NBRC 1267 / NRRL Y-1140 / WM37) (Yeast) (Candida sphaerica)	567	RAG1	KHT1	KLLA0D13310g			SUBCELLULAR LOCATION: Membrane; Multi-pass membrane protein.		TOPO_DOM 18 62 Cytoplasmic. {ECO:0000255}.; TOPO_DOM 84 113 Extracellular. {ECO:0000255}.; TOPO_DOM 135 141 Cytoplasmic. {ECO:0000255}.; TOPO_DOM 163 167 Extracellular. {ECO:0000255}.; TOPO_DOM 189 199 Cytoplasmic. {ECO:0000255}.; TOPO_DOM 221 234 Extracellular. {ECO:0000255}.; TOPO_DOM 256 334 Cytoplasmic. {ECO:0000255}.; TOPO_DOM 355 358 Extracellular. {ECO:0000255}.; TOPO_DOM 380 386 Cytoplasm…	TRANSMEM 63 83 Helical; Name=1. {ECO:0000255}.; TRANSMEM 114 134 Helical; Name=2. {ECO:0000255}.; TRANSMEM 142 162 Helical; Name=3. {ECO:0000255}.; TRANSMEM 168 188 Helical; Name=4. {ECO:0000255}.; TRANSMEM 200 220 Helical; Name=5. {ECO:0000255}.; TRANSMEM 235 255 Helical; Name=6. {ECO:0000255}.; TRANSMEM 335 354 Helical; Name=7. {ECO:0000255}.; TRANSMEM 359 379 Helical; Name=8. {ECO:0000255}.; T…	integral component of membrane [GO:0016021]; substrate-specific transmembrane transporter activity [GO:0022891]; carbohydrate transport [GO:0008643]	carbohydrate transport [GO:0008643]	substrate-specific transmembrane transporter activity [GO:0022891]	integral component of membrane [GO:0016021]	GO:0008643; GO:0016021; GO:0022891							FUNCTION: Low-affinity glucose transporter.		3 out of 5
g1982.t1	GK5S-3023	-	2060:0-249	GLC	XYL	OK	2392	300.002	-2.99517	-12.5717	5e-05	0.00100773	yes	g1982.t1	P18631	RAG1_KLULA	reviewed	Low-affinity glucose transporter (Hexose transporter 1)	RAG1 KHT1 KLLA0D13310g	Kluyveromyces lactis (strain ATCC 8585 / CBS 2359 / DSM 70799 / NBRC 1267 / NRRL Y-1140 / WM37) (Yeast) (Candida sphaerica)	567	RAG1	KHT1	KLLA0D13310g			SUBCELLULAR LOCATION: Membrane; Multi-pass membrane protein.		TOPO_DOM 18 62 Cytoplasmic. {ECO:0000255}.; TOPO_DOM 84 113 Extracellular. {ECO:0000255}.; TOPO_DOM 135 141 Cytoplasmic. {ECO:0000255}.; TOPO_DOM 163 167 Extracellular. {ECO:0000255}.; TOPO_DOM 189 199 Cytoplasmic. {ECO:0000255}.; TOPO_DOM 221 234 Extracellular. {ECO:0000255}.; TOPO_DOM 256 334 Cytoplasmic. {ECO:0000255}.; TOPO_DOM 355 358 Extracellular. {ECO:0000255}.; TOPO_DOM 380 386 Cytoplasm…	TRANSMEM 63 83 Helical; Name=1. {ECO:0000255}.; TRANSMEM 114 134 Helical; Name=2. {ECO:0000255}.; TRANSMEM 142 162 Helical; Name=3. {ECO:0000255}.; TRANSMEM 168 188 Helical; Name=4. {ECO:0000255}.; TRANSMEM 200 220 Helical; Name=5. {ECO:0000255}.; TRANSMEM 235 255 Helical; Name=6. {ECO:0000255}.; TRANSMEM 335 354 Helical; Name=7. {ECO:0000255}.; TRANSMEM 359 379 Helical; Name=8. {ECO:0000255}.; T…	integral component of membrane [GO:0016021]; substrate-specific transmembrane transporter activity [GO:0022891]; carbohydrate transport [GO:0008643]	carbohydrate transport [GO:0008643]	substrate-specific transmembrane transporter activity [GO:0022891]	integral component of membrane [GO:0016021]	GO:0008643; GO:0016021; GO:0022891							FUNCTION: Low-affinity glucose transporter.		3 out of 5
g473.t1	GK5S-4552	-	514:0-321	GLC	XYL	OK	3664.53	448.706	-3.02979	-10.1091	5e-05	0.00100773	yes	g473.t1	P53387	KHT2_KLULC	reviewed	Hexose transporter 2	KHT2	Kluyveromyces lactis (Yeast) (Candida sphaerica)	566	KHT2					SUBCELLULAR LOCATION: Membrane; Multi-pass membrane protein.		TOPO_DOM 22 61 Cytoplasmic. {ECO:0000255}.; TOPO_DOM 83 112 Extracellular. {ECO:0000255}.; TOPO_DOM 134 140 Cytoplasmic. {ECO:0000255}.; TOPO_DOM 162 166 Extracellular. {ECO:0000255}.; TOPO_DOM 188 198 Cytoplasmic. {ECO:0000255}.; TOPO_DOM 220 233 Extracellular. {ECO:0000255}.; TOPO_DOM 255 333 Cytoplasmic. {ECO:0000255}.; TOPO_DOM 354 357 Extracellular. {ECO:0000255}.; TOPO_DOM 379 385 Cytoplasm…	TRANSMEM 62 82 Helical; Name=1. {ECO:0000255}.; TRANSMEM 113 133 Helical; Name=2. {ECO:0000255}.; TRANSMEM 141 161 Helical; Name=3. {ECO:0000255}.; TRANSMEM 167 187 Helical; Name=4. {ECO:0000255}.; TRANSMEM 199 219 Helical; Name=5. {ECO:0000255}.; TRANSMEM 234 254 Helical; Name=6. {ECO:0000255}.; TRANSMEM 334 353 Helical; Name=7. {ECO:0000255}.; TRANSMEM 358 378 Helical; Name=8. {ECO:0000255}.; T…	integral component of membrane [GO:0016021]; substrate-specific transmembrane transporter activity [GO:0022891]; carbohydrate transport [GO:0008643]	carbohydrate transport [GO:0008643]	substrate-specific transmembrane transporter activity [GO:0022891]	integral component of membrane [GO:0016021]	GO:0008643; GO:0016021; GO:0022891							FUNCTION: Probable glucose transporter.		2 out of 5
g4165.t1	GK5S-804	-	4129:0-323	GLC	XYL	OK	3440.6	419.053	-3.03746	-9.86373	5e-05	0.00100773	yes	g4165.t1	P53387	KHT2_KLULC	reviewed	Hexose transporter 2	KHT2	Kluyveromyces lactis (Yeast) (Candida sphaerica)	566	KHT2					SUBCELLULAR LOCATION: Membrane; Multi-pass membrane protein.		TOPO_DOM 22 61 Cytoplasmic. {ECO:0000255}.; TOPO_DOM 83 112 Extracellular. {ECO:0000255}.; TOPO_DOM 134 140 Cytoplasmic. {ECO:0000255}.; TOPO_DOM 162 166 Extracellular. {ECO:0000255}.; TOPO_DOM 188 198 Cytoplasmic. {ECO:0000255}.; TOPO_DOM 220 233 Extracellular. {ECO:0000255}.; TOPO_DOM 255 333 Cytoplasmic. {ECO:0000255}.; TOPO_DOM 354 357 Extracellular. {ECO:0000255}.; TOPO_DOM 379 385 Cytoplasm…	TRANSMEM 62 82 Helical; Name=1. {ECO:0000255}.; TRANSMEM 113 133 Helical; Name=2. {ECO:0000255}.; TRANSMEM 141 161 Helical; Name=3. {ECO:0000255}.; TRANSMEM 167 187 Helical; Name=4. {ECO:0000255}.; TRANSMEM 199 219 Helical; Name=5. {ECO:0000255}.; TRANSMEM 234 254 Helical; Name=6. {ECO:0000255}.; TRANSMEM 334 353 Helical; Name=7. {ECO:0000255}.; TRANSMEM 358 378 Helical; Name=8. {ECO:0000255}.; T…	integral component of membrane [GO:0016021]; substrate-specific transmembrane transporter activity [GO:0022891]; carbohydrate transport [GO:0008643]	carbohydrate transport [GO:0008643]	substrate-specific transmembrane transporter activity [GO:0022891]	integral component of membrane [GO:0016021]	GO:0008643; GO:0016021; GO:0022891							FUNCTION: Probable glucose transporter.		2 out of 5
[truncated: 91 more columns]

## Sheet: GO_amino acid transport
test_id	gene_id	gene	locus	sample_1	sample_2	status	value_1	value_2	log2(fold_change)	test_stat	p_value	q_value	significant	gene	Entry	Entry name	Status	Protein names	Gene names	Organism	Length	Gene names (primary )	Gene names (synonym )	Gene names (ordered locus )	Gene names (ORF )	EC number	Subcellular location [CC]	Intramembrane	Topological domain	Transmembrane	Gene ontology (GO)	Gene ontology (biological process)	Gene ontology (molecular function)	Gene ontology (cellular component)	Gene ontology IDs	Domain [CC]	Domain [FT]	Motif	Zinc finger	DNA binding	Pathway	Function [CC]	Enzyme regulation	Annotation	Post-translational modification	Cross-reference (BioGrid)	Cross-reference (DIP)	Cross-reference (IntAct)	Cross-reference (MINT)
g1786.t1	GK5S-3234	-	1818:29894-31626	GLC	XYL	OK	24.929	112.413	2.17291	3.83313	5e-05	0.00100773	yes	g1786.t1	P53388	DIP5_YEAST	reviewed	Dicarboxylic amino acid permease	DIP5 YPL265W	Saccharomyces cerevisiae (strain ATCC 204508 / S288c) (Baker's yeast)	608	DIP5		YPL265W			SUBCELLULAR LOCATION: Membrane; Multi-pass membrane protein.		TOPO_DOM 1 90 Cytoplasmic. {ECO:0000255}.; TOPO_DOM 112 119 Extracellular. {ECO:0000255}.; TOPO_DOM 143 156 Cytoplasmic. {ECO:0000255}.; TOPO_DOM 178 201 Extracellular. {ECO:0000255}.; TOPO_DOM 223 231 Cytoplasmic. {ECO:0000255}.; TOPO_DOM 253 285 Extracellular. {ECO:0000255}.; TOPO_DOM 307 322 Cytoplasmic. {ECO:0000255}.; TOPO_DOM 344 372 Extracellular. {ECO:0000255}.; TOPO_DOM 394 423 Cytoplasm…	TRANSMEM 91 111 Helical. {ECO:0000255}.; TRANSMEM 120 142 Helical. {ECO:0000255}.; TRANSMEM 157 177 Helical. {ECO:0000255}.; TRANSMEM 202 222 Helical. {ECO:0000255}.; TRANSMEM 232 252 Helical. {ECO:0000255}.; TRANSMEM 286 306 Helical. {ECO:0000255}.; TRANSMEM 323 343 Helical. {ECO:0000255}.; TRANSMEM 373 393 Helical. {ECO:0000255}.; TRANSMEM 424 444 Helical. {ECO:0000255}.; TRANSMEM 455 475 Helic…	integral component of membrane [GO:0016021]; plasma membrane [GO:0005886]; amino acid transmembrane transporter activity [GO:0015171]; amino acid transport [GO:0006865]	amino acid transport [GO:0006865]	amino acid transmembrane transporter activity [GO:0015171]	integral component of membrane [GO:0016021]; plasma membrane [GO:0005886]	GO:0015171; GO:0006865; GO:0016021; GO:0005886							FUNCTION: Can transport glutamate, aspartate, glutamine, asparagine, serine, alanine and glycine. {ECO:0000269|PubMed:10654085}.		4 out of 5		35948;	DIP-5540N;	P53388;	MINT-499810;
g3509.t1	GK5S-1468	-	3315:1366-1804	GLC	XYL	OK	36.6683	158.365	2.11065	4.22491	0.00085	0.0110571	yes	g3509.t1	P32837	UGA4_YEAST	reviewed	GABA-specific permease (GABA-specific transport protein)	UGA4 YDL210W D1037	Saccharomyces cerevisiae (strain ATCC 204508 / S288c) (Baker's yeast)	571	UGA4		YDL210W	D1037		SUBCELLULAR LOCATION: Vacuole membrane {ECO:0000269|PubMed:14985124}; Multi-pass membrane protein {ECO:0000269|PubMed:14985124}.		TOPO_DOM 1 73 Cytoplasmic. {ECO:0000255}.; TOPO_DOM 95 105 Vacuolar. {ECO:0000255}.; TOPO_DOM 127 153 Cytoplasmic. {ECO:0000255}.; TOPO_DOM 175 198 Vacuolar. {ECO:0000255}.; TOPO_DOM 220 228 Cytoplasmic. {ECO:0000255}.; TOPO_DOM 250 271 Vacuolar. {ECO:0000255}.; TOPO_DOM 293 312 Cytoplasmic. {ECO:0000255}.; TOPO_DOM 334 364 Vacuolar. {ECO:0000255}.; TOPO_DOM 386 416 Cytoplasmic. {ECO:0000255}.; T…	TRANSMEM 74 94 Helical. {ECO:0000255}.; TRANSMEM 106 126 Helical. {ECO:0000255}.; TRANSMEM 154 174 Helical. {ECO:0000255}.; TRANSMEM 199 219 Helical. {ECO:0000255}.; TRANSMEM 229 249 Helical. {ECO:0000255}.; TRANSMEM 272 292 Helical. {ECO:0000255}.; TRANSMEM 313 333 Helical. {ECO:0000255}.; TRANSMEM 365 385 Helical. {ECO:0000255}.; TRANSMEM 417 437 Helical. {ECO:0000255}.; TRANSMEM 442 462 Helica…	fungal-type vacuole membrane [GO:0000329]; integral component of membrane [GO:0016021]; gamma-aminobutyric acid:proton symporter activity [GO:0015495]; putrescine transmembrane transporter activity [GO:0015489]; gamma-aminobutyric acid transport [GO:0015812]; putrescine transport [GO:0015847]; transmembrane transport [GO:0055085]	gamma-aminobutyric acid transport [GO:0015812]; putrescine transport [GO:0015847]; transmembrane transport [GO:0055085]	gamma-aminobutyric acid:proton symporter activity [GO:0015495]; putrescine transmembrane transporter activity [GO:0015489]	fungal-type vacuole membrane [GO:0000329]; integral component of membrane [GO:0016021]	GO:0000329; GO:0015812; GO:0015495; GO:0016021; GO:0015489; GO:0015847; GO:0055085							FUNCTION: Required for high-affinity, high-specificity GABA transport. Also transports putrescine. {ECO:0000269|PubMed:14985124}.		4 out of 5		31836;	DIP-1857N;	P32837;	MINT-409806;
g271.t1	GK5S-4757	-	286:1344-3211	GLC	XYL	OK	6.66199	25.951	1.96177	2.84349	0.0014	0.0161137	yes	g271.t1	P25596	GEX1_YEAST	reviewed	Glutathione exchanger 1	GEX1 YCL073C YCL70C/YCL71C/YCL73C	Saccharomyces cerevisiae (strain ATCC 204508 / S288c) (Baker's yeast)	615	GEX1		YCL073C	YCL70C/YCL71C/YCL73C		SUBCELLULAR LOCATION: Cell membrane {ECO:0000269|PubMed:21490148}; Multi-pass membrane protein {ECO:0000269|PubMed:21490148}. Vacuole membrane {ECO:0000269|PubMed:21490148}; Multi-pass membrane protein {ECO:0000269|PubMed:21490148}.		TOPO_DOM 1 58 Cytoplasmic. {ECO:0000255}.; TOPO_DOM 80 120 Extracellular. {ECO:0000255}.; TOPO_DOM 142 152 Cytoplasmic. {ECO:0000255}.; TOPO_DOM 174 186 Extracellular. {ECO:0000255}.; TOPO_DOM 208 216 Cytoplasmic. {ECO:0000255}.; TOPO_DOM 238 275 Extracellular. {ECO:0000255}.; TOPO_DOM 297 306 Cytoplasmic. {ECO:0000255}.; TOPO_DOM 328 343 Extracellular. {ECO:0000255}.; TOPO_DOM 365 383 Cytoplasmi…	TRANSMEM 59 79 Helical. {ECO:0000255}.; TRANSMEM 121 141 Helical. {ECO:0000255}.; TRANSMEM 153 173 Helical. {ECO:0000255}.; TRANSMEM 187 207 Helical. {ECO:0000255}.; TRANSMEM 217 237 Helical. {ECO:0000255}.; TRANSMEM 276 296 Helical. {ECO:0000255}.; TRANSMEM 307 327 Helical. {ECO:0000255}.; TRANSMEM 344 364 Helical. {ECO:0000255}.; TRANSMEM 384 404 Helical. {ECO:0000255}.; TRANSMEM 408 428 Helica…	integral component of membrane [GO:0016021]; plasma membrane [GO:0005886]; vacuolar membrane [GO:0005774]; solute:proton antiporter activity [GO:0015299]; glutathione transmembrane transport [GO:0034775]; hydrogen ion transmembrane transport [GO:1902600]	glutathione transmembrane transport [GO:0034775]; hydrogen ion transmembrane transport [GO:1902600]	solute:proton antiporter activity [GO:0015299]	integral component of membrane [GO:0016021]; plasma membrane [GO:0005886]; vacuolar membrane [GO:0005774]	GO:0034775; GO:1902600; GO:0016021; GO:0005886; GO:0015299; GO:0005774							FUNCTION: Proton/glutathione antiporter that imports glutathione from the vacuole and exports it through the plasma membrane. Involved in resistance to oxidative stress and modulation of the PKA pathway. {ECO:0000269|PubMed:21490148}.		4 out of 5		30919;	DIP-8068N;	P25596;	MINT-1355979;
g3162.t1	GK5S-1815	-	3029:0-1240	GLC	XYL	OK	39.6107	142.126	1.84321	3.30635	0.0002	0.00326111	yes	g3162.t1	P32837	UGA4_YEAST	reviewed	GABA-specific permease (GABA-specific transport protein)	UGA4 YDL210W D1037	Saccharomyces cerevisiae (strain ATCC 204508 / S288c) (Baker's yeast)	571	UGA4		YDL210W	D1037		SUBCELLULAR LOCATION: Vacuole membrane {ECO:0000269|PubMed:14985124}; Multi-pass membrane protein {ECO:0000269|PubMed:14985124}.		TOPO_DOM 1 73 Cytoplasmic. {ECO:0000255}.; TOPO_DOM 95 105 Vacuolar. {ECO:0000255}.; TOPO_DOM 127 153 Cytoplasmic. {ECO:0000255}.; TOPO_DOM 175 198 Vacuolar. {ECO:0000255}.; TOPO_DOM 220 228 Cytoplasmic. {ECO:0000255}.; TOPO_DOM 250 271 Vacuolar. {ECO:0000255}.; TOPO_DOM 293 312 Cytoplasmic. {ECO:0000255}.; TOPO_DOM 334 364 Vacuolar. {ECO:0000255}.; TOPO_DOM 386 416 Cytoplasmic. {ECO:0000255}.; T…	TRANSMEM 74 94 Helical. {ECO:0000255}.; TRANSMEM 106 126 Helical. {ECO:0000255}.; TRANSMEM 154 174 Helical. {ECO:0000255}.; TRANSMEM 199 219 Helical. {ECO:0000255}.; TRANSMEM 229 249 Helical. {ECO:0000255}.; TRANSMEM 272 292 Helical. {ECO:0000255}.; TRANSMEM 313 333 Helical. {ECO:0000255}.; TRANSMEM 365 385 Helical. {ECO:0000255}.; TRANSMEM 417 437 Helical. {ECO:0000255}.; TRANSMEM 442 462 Helica…	fungal-type vacuole membrane [GO:0000329]; integral component of membrane [GO:0016021]; gamma-aminobutyric acid:proton symporter activity [GO:0015495]; putrescine transmembrane transporter activity [GO:0015489]; gamma-aminobutyric acid transport [GO:0015812]; putrescine transport [GO:0015847]; transmembrane transport [GO:0055085]	gamma-aminobutyric acid transport [GO:0015812]; putrescine transport [GO:0015847]; transmembrane transport [GO:0055085]	gamma-aminobutyric acid:proton symporter activity [GO:0015495]; putrescine transmembrane transporter activity [GO:0015489]	fungal-type vacuole membrane [GO:0000329]; integral component of membrane [GO:0016021]	GO:0000329; GO:0015812; GO:0015495; GO:0016021; GO:0015489; GO:0015847; GO:0055085							FUNCTION: Required for high-affinity, high-specificity GABA transport. Also transports putrescine. {ECO:0000269|PubMed:14985124}.		4 out of 5		31836;	DIP-1857N;	P32837;	MINT-409806;
g2051.t1	GK5S-2956	-	2089:5902-7037	GLC	XYL	OK	7.49164	21.3243	1.50915	2.00836	0.0244	0.133546	no	g2051.t1	P53286	BTN2_YEAST	reviewed	Protein BTN2 (Batten disease protein 2)	BTN2 YGR142W	Saccharomyces cerevisiae (strain ATCC 204508 / S288c) (Baker's yeast)	410	BTN2		YGR142W			SUBCELLULAR LOCATION: Cytoplasm. Late endosome.				cytosol [GO:0005829]; late endosome [GO:0005770]; nuclear periphery [GO:0034399]; nucleus [GO:0005634]; perinuclear region of cytoplasm [GO:0048471]; chaperone binding [GO:0051087]; SNARE binding [GO:0000149]; amino acid transport [GO:0006865]; intracellular protein transport [GO:0006886]; protein folding [GO:0006457]; protein localization to nucleus [GO:0034504]; regulation of pH [GO:0006885]; r…	amino acid transport [GO:0006865]; intracellular protein transport [GO:0006886]; protein folding [GO:0006457]; protein localization to nucleus [GO:0034504]; regulation of pH [GO:0006885]; retrograde transport, endosome to Golgi [GO:0042147]	chaperone binding [GO:0051087]; SNARE binding [GO:0000149]	cytosol [GO:0005829]; late endosome [GO:0005770]; nuclear periphery [GO:0034399]; nucleus [GO:0005634]; perinuclear region of cytoplasm [GO:0048471]	GO:0000149; GO:0006865; GO:0051087; GO:0005829; GO:0006886; GO:0005770; GO:0034399; GO:0005634; GO:0048471; GO:0006457; GO:0034504; GO:0006885; GO:0042147							FUNCTION: V-SNARE binding protein that facilitates specific protein retrieval from a late endosome to the Golgi. Modulates the rate of arginine uptake. Involved in pH homeostasis. Required for the correct localization of IST2. May be involved in ion homeostasis together with IST2. {ECO:0000269|PubMed:11053386, ECO:0000269|PubMed:12456008, ECO:0000269|PubMed:15701790, ECO:0000269|PubMed:21441304}.		5 out of 5		33388;	DIP-5534N;	P53286;	MINT-493392;
g3410.t1	GK5S-1567	-	3210:1769-3267	GLC	XYL	OK	47.726	112.635	1.23881	2.29903	0.0038	0.0351276	yes	g3410.t1	P38680	MTR_NEUCR	reviewed	N amino acid transport system protein (Methyltryptophan resistance protein)	mtr NCU06619	Neurospora crassa (strain ATCC 24698 / 74-OR23-1A / CBS 708.71 / DSM 1257 / FGSC 987)	470	mtr			NCU06619		SUBCELLULAR LOCATION: Membrane; Multi-pass membrane protein.		TOPO_DOM 1 56 Extracellular. {ECO:0000255}.; TOPO_DOM 99 131 Extracellular. {ECO:0000255}.; TOPO_DOM 153 168 Cytoplasmic. {ECO:0000255}.; TOPO_DOM 212 236 Cytoplasmic. {ECO:0000255}.; TOPO_DOM 258 275 Extracellular. {ECO:0000255}.; TOPO_DOM 297 316 Cytoplasmic. {ECO:0000255}.; TOPO_DOM 338 357 Extracellular. {ECO:0000255}.; TOPO_DOM 379 386 Cytoplasmic. {ECO:0000255}.; TOPO_DOM 408 427 Extracellu…	TRANSMEM 57 77 Helical. {ECO:0000255}.; TRANSMEM 78 98 Helical. {ECO:0000255}.; TRANSMEM 132 152 Helical. {ECO:0000255}.; TRANSMEM 169 189 Helical. {ECO:0000255}.; TRANSMEM 191 211 Helical. {ECO:0000255}.; TRANSMEM 237 257 Helical. {ECO:0000255}.; TRANSMEM 276 296 Helical. {ECO:0000255}.; TRANSMEM 317 337 Helical. {ECO:0000255}.; TRANSMEM 358 378 Helical. {ECO:0000255}.; TRANSMEM 387 407 Helical.…	integral component of membrane [GO:0016021]; amino acid transport [GO:0006865]	amino acid transport [GO:0006865]		integral component of membrane [GO:0016021]	GO:0006865; GO:0016021							FUNCTION: Required for the transport of neutral aliphatic and aromatic amino acids via the N system.		2 out of 5
g180.t1	GK5S-4836	-	227:24926-25956	GLC	XYL	OK	11.9236	25.2847	1.08444	1.61262	0.061	0.247799	no	g180.t1	Q6CLN9	BTN1_KLULA	reviewed	Protein BTN1	BTN1 KLLA0F01551g	Kluyveromyces lactis (strain ATCC 8585 / CBS 2359 / DSM 70799 / NBRC 1267 / NRRL Y-1140 / WM37) (Yeast) (Candida sphaerica)	387	BTN1		KLLA0F01551g			SUBCELLULAR LOCATION: Vacuole membrane {ECO:0000250}; Multi-pass membrane protein {ECO:0000250}.			TRANSMEM 43 63 Helical. {ECO:0000255}.; TRANSMEM 72 92 Helical. {ECO:0000255}.; TRANSMEM 93 113 Helical. {ECO:0000255}.; TRANSMEM 129 149 Helical. {ECO:0000255}.; TRANSMEM 151 171 Helical. {ECO:0000255}.; TRANSMEM 225 245 Helical. {ECO:0000255}.; TRANSMEM 257 276 Helical. {ECO:0000255}.; TRANSMEM 278 298 Helical. {ECO:0000255}.; TRANSMEM 308 328 Helical. {ECO:0000255}.; TRANSMEM 347 367 Helical. …	integral component of membrane [GO:0016021]; vacuolar membrane [GO:0005774]; amino acid transport [GO:0006865]	amino acid transport [GO:0006865]		integral component of membrane [GO:0016021]; vacuolar membrane [GO:0005774]	GO:0006865; GO:0016021; GO:0005774							FUNCTION: Involved in vacuolar transport and vacuole pH homeostasis. Also required for cytokinesis (By similarity). {ECO:0000250}.		2 out of 5
g4234.t1	GK5S-740	-	4242:9011-10782	GLC	XYL	OK	136.821	259.903	0.925679	1.82083	0.0189	0.111781	no	g4234.t1	P19145	GAP1_YEAST	reviewed	General amino-acid permease GAP1	GAP1 YKR039W	Saccharomyces cerevisiae (strain ATCC 204508 / S288c) (Baker's yeast)	602	GAP1		YKR039W			SUBCELLULAR LOCATION: Membrane; Multi-pass membrane protein.		TOPO_DOM 1 95 Cytoplasmic. {ECO:0000255}.; TOPO_DOM 117 121 Extracellular. {ECO:0000255}.; TOPO_DOM 143 165 Cytoplasmic. {ECO:0000255}.; TOPO_DOM 186 204 Extracellular. {ECO:0000255}.; TOPO_DOM 225 237 Cytoplasmic. {ECO:0000255}.; TOPO_DOM 257 280 Extracellular. {ECO:0000255}.; TOPO_DOM 299 321 Cytoplasmic. {ECO:0000255}.; TOPO_DOM 343 376 Extracellular. {ECO:0000255}.; TOPO_DOM 397 421 Cytoplasm…	TRANSMEM 96 116 Helical. {ECO:0000255}.; TRANSMEM 122 142 Helical. {ECO:0000255}.; TRANSMEM 166 185 Helical. {ECO:0000255}.; TRANSMEM 205 224 Helical. {ECO:0000255}.; TRANSMEM 238 256 Helical. {ECO:0000255}.; TRANSMEM 281 298 Helical. {ECO:0000255}.; TRANSMEM 322 342 Helical. {ECO:0000255}.; TRANSMEM 377 396 Helical. {ECO:0000255}.; TRANSMEM 422 442 Helical. {ECO:0000255}.; TRANSMEM 452 472 Helic…	endosome [GO:0005768]; ER to Golgi transport vesicle [GO:0030134]; fungal-type vacuole lumen [GO:0000328]; integral component of plasma membrane [GO:0005887]; multivesicular body [GO:0005771]; plasma membrane [GO:0005886]; amino acid transmembrane transporter activity [GO:0015171]; L-phenylalanine transmembrane transporter activity [GO:0015192]; L-proline transmembrane transporter activity [GO:00…	amino acid transport [GO:0006865]; phenylalanine transport [GO:0015823]; polyamine transmembrane transport [GO:1902047]; polyamine transport [GO:0015846]; proline transmembrane transport [GO:0035524]	amino acid transmembrane transporter activity [GO:0015171]; L-phenylalanine transmembrane transporter activity [GO:0015192]; L-proline transmembrane transporter activity [GO:0015193]; polyamine transmembrane transporter activity [GO:0015203]	endosome [GO:0005768]; ER to Golgi transport vesicle [GO:0030134]; fungal-type vacuole lumen [GO:0000328]; integral component of plasma membrane [GO:0005887]; multivesicular body [GO:0005771]; plasma membrane [GO:0005886]	GO:0030134; GO:0015192; GO:0015193; GO:0015171; GO:0006865; GO:0005768; GO:0000328; GO:0005887; GO:0005771; GO:0015823; GO:0005886; GO:1902047; GO:0015203; GO:0015846; GO:0035524							FUNCTION: Permease for various amino acids as well as for GABA. Can also transport L-cysteine and beta-alanine. {ECO:0000269|PubMed:10373490, ECO:0000269|PubMed:10467005}.		5 out of 5		34171;	DIP-8010N;	P19145;	MINT-1358192;
g4675.t1	GK5S-290	-	4776:579-2251	GLC	XYL	OK	294.028	546.654	0.894674	1.81086	0.0223	0.125565	no	g4675.t1	P19807	HNM1_YEAST	reviewed	Choline transport protein	HNM1 CTR CTR1 YGL077C	Saccharomyces cerevisiae (strain ATCC 204508 / S288c) (Baker's yeast)	563	HNM1	CTR CTR1	YGL077C			SUBCELLULAR LOCATION: Membrane; Multi-pass membrane protein.		TOPO_DOM 1 57 Extracellular. {ECO:0000255}.; TOPO_DOM 79 87 Cytoplasmic. {ECO:0000255}.; TOPO_DOM 109 182 Extracellular. {ECO:0000255}.; TOPO_DOM 204 205 Cytoplasmic. {ECO:0000255}.; TOPO_DOM 227 255 Extracellular. {ECO:0000255}.; TOPO_DOM 277 293 Cytoplasmic. {ECO:0000255}.; TOPO_DOM 315 342 Extracellular. {ECO:0000255}.; TOPO_DOM 364 398 Cytoplasmic. {ECO:0000255}.; TOPO_DOM 418 426 Extracellul…	TRANSMEM 58 78 Helical. {ECO:0000255}.; TRANSMEM 88 108 Helical. {ECO:0000255}.; TRANSMEM 183 203 Helical. {ECO:0000255}.; TRANSMEM 206 226 Helical. {ECO:0000255}.; TRANSMEM 256 276 Helical. {ECO:0000255}.; TRANSMEM 294 314 Helical. {ECO:0000255}.; TRANSMEM 343 363 Helical. {ECO:0000255}.; TRANSMEM 399 417 Helical. {ECO:0000255}.; TRANSMEM 427 445 Helical. {ECO:0000255}.; TRANSMEM 466 486 Helical…	integral component of membrane [GO:0016021]; plasma membrane [GO:0005886]; (R)-carnitine transmembrane transporter activity [GO:1901235]; amino acid transmembrane transporter activity [GO:0015171]; choline transmembrane transporter activity [GO:0015220]; ethanolamine transmembrane transporter activity [GO:0034228]; (R)-carnitine transmembrane transport [GO:1902270]; (R)-carnitine transport [GO:19…	(R)-carnitine transmembrane transport [GO:1902270]; (R)-carnitine transport [GO:1900749]; choline transport [GO:0015871]; ethanolamine transport [GO:0034229]; glycine betaine transport [GO:0031460]	(R)-carnitine transmembrane transporter activity [GO:1901235]; amino acid transmembrane transporter activity [GO:0015171]; choline transmembrane transporter activity [GO:0015220]; ethanolamine transmembrane transporter activity [GO:0034228]	integral component of membrane [GO:0016021]; plasma membrane [GO:0005886]	GO:1902270; GO:1901235; GO:1900749; GO:0015171; GO:0015220; GO:0015871; GO:0034228; GO:0034229; GO:0031460; GO:0016021; GO:0005886							FUNCTION: Sole choline transporter in yeast.		5 out of 5		33173;	DIP-7965N;	P19807;	MINT-4485703;
g2368.t1	GK5S-2627	-	2318:4275-5881	GLC	XYL	OK	13.9122	25.2155	0.857961	1.31646	0.09595	0.324626	no	g2368.t1	P38734	MUP3_YEAST	reviewed	Low-affinity methionine permease	MUP3 YHL036W	Saccharomyces cerevisiae (strain ATCC 204508 / S288c) (Baker's yeast)	546	MUP3		YHL036W			SUBCELLULAR LOCATION: Membrane {ECO:0000305}; Multi-pass membrane protein {ECO:0000305}.		TOPO_DOM 1 70 Extracellular. {ECO:0000255}.; TOPO_DOM 92 98 Cytoplasmic. {ECO:0000255}.; TOPO_DOM 120 148 Extracellular. {ECO:0000255}.; TOPO_DOM 170 188 Cytoplasmic. {ECO:0000255}.; TOPO_DOM 210 213 Extracellular. {ECO:0000255}.; TOPO_DOM 235 254 Cytoplasmic. {ECO:0000255}.; TOPO_DOM 276 297 Extracellular. {ECO:0000255}.; TOPO_DOM 319 319 Cytoplasmic. {ECO:0000255}.; TOPO_DOM 341 346 Extracellul…	TRANSMEM 71 91 Helical. {ECO:0000255}.; TRANSMEM 99 119 Helical. {ECO:0000255}.; TRANSMEM 149 169 Helical. {ECO:0000255}.; TRANSMEM 189 209 Helical. {ECO:0000255}.; TRANSMEM 214 234 Helical. {ECO:0000255}.; TRANSMEM 255 275 Helical. {ECO:0000255}.; TRANSMEM 298 318 Helical. {ECO:0000255}.; TRANSMEM 320 340 Helical. {ECO:0000255}.; TRANSMEM 347 367 Helical. {ECO:0000255}.; TRANSMEM 394 414 Helical…	integral component of membrane [GO:0016021]; L-methionine transmembrane transporter activity [GO:0015191]; L-alpha-amino acid transmembrane transport [GO:1902475]; L-amino acid transport [GO:0015807]; methionine import [GO:0044690]	L-alpha-amino acid transmembrane transport [GO:1902475]; L-amino acid transport [GO:0015807]; methionine import [GO:0044690]	L-methionine transmembrane transporter activity [GO:0015191]	integral component of membrane [GO:0016021]	GO:1902475; GO:0015807; GO:0015191; GO:0016021; GO:0044690							FUNCTION: Very low affinity permease for methionine.		3 out of 5		36386;	DIP-5572N;	P38734;	MINT-486480;
g4644.t1	GK5S-339	-	4710:32891-34752	GLC	XYL	OK	4.64443	6.86075	0.562863	0.69569	0.38135	0.664947	no	g4644.t1	P41815	BAP3_YEAST	reviewed	Valine amino-acid permease (Branched-chain amino-acid permease 3)	BAP3 PAP1 YDR046C YD9609.02C	Saccharomyces cerevisiae (strain ATCC 204508 / S288c) (Baker's yeast)	604	BAP3	PAP1	YDR046C	YD9609.02C		SUBCELLULAR LOCATION: Membrane; Multi-pass membrane protein.		TOPO_DOM 1 95 Cytoplasmic. {ECO:0000255}.; TOPO_DOM 117 119 Extracellular. {ECO:0000255}.; TOPO_DOM 141 169 Cytoplasmic. {ECO:0000255}.; TOPO_DOM 191 206 Extracellular. {ECO:0000255}.; TOPO_DOM 228 238 Cytoplasmic. {ECO:0000255}.; TOPO_DOM 260 284 Extracellular. {ECO:0000255}.; TOPO_DOM 306 323 Cytoplasmic. {ECO:0000255}.; TOPO_DOM 345 377 Extracellular. {ECO:0000255}.; TOPO_DOM 399 423 Cytoplasm…	TRANSMEM 96 116 Helical. {ECO:0000255}.; TRANSMEM 120 140 Helical. {ECO:0000255}.; TRANSMEM 170 190 Helical. {ECO:0000255}.; TRANSMEM 207 227 Helical. {ECO:0000255}.; TRANSMEM 239 259 Helical. {ECO:0000255}.; TRANSMEM 285 305 Helical. {ECO:0000255}.; TRANSMEM 324 344 Helical. {ECO:0000255}.; TRANSMEM 378 398 Helical. {ECO:0000255}.; TRANSMEM 424 444 Helical. {ECO:0000255}.; TRANSMEM 450 470 Helic…	integral component of membrane [GO:0016021]; plasma membrane [GO:0005886]; amino acid transmembrane transporter activity [GO:0015171]; amino acid transport [GO:0006865]; transmembrane transport [GO:0055085]	amino acid transport [GO:0006865]; transmembrane transport [GO:0055085]	amino acid transmembrane transporter activity [GO:0015171]	integral component of membrane [GO:0016021]; plasma membrane [GO:0005886]	GO:0015171; GO:0006865; GO:0016021; GO:0005886; GO:0055085							FUNCTION: Involved in transport of isoleucine, leucine, valine, cysteine, methionine, phenylalanine, tyrosine and tryptophan. {ECO:0000269|PubMed:10467005, ECO:0000269|PubMed:10654085}.		3 out of 5		32101;	DIP-7900N;	P41815;	MINT-1355630;
g1701.t1	GK5S-3320	-	1751:25359-27097	GLC	XYL	OK	20.3901	27.6207	0.43788	0.709835	0.3661	0.652035	no	g1701.t1	P50276	MUP1_YEAST	reviewed	High-affinity methionine permease	MUP1 YGR055W	Saccharomyces cerevisiae (strain ATCC 204508 / S288c) (Baker's yeast)	574	MUP1		YGR055W			SUBCELLULAR LOCATION: Membrane {ECO:0000305}; Multi-pass membrane protein {ECO:0000305}.		TOPO_DOM 1 61 Cytoplasmic. {ECO:0000255}.; TOPO_DOM 83 92 Extracellular. {ECO:0000255}.; TOPO_DOM 114 140 Cytoplasmic. {ECO:0000255}.; TOPO_DOM 162 182 Extracellular. {ECO:0000255}.; TOPO_DOM 204 207 Cytoplasmic. {ECO:0000255}.; TOPO_DOM 229 293 Extracellular. {ECO:0000255}.; TOPO_DOM 315 340 Cytoplasmic. {ECO:0000255}.; TOPO_DOM 362 418 Extracellular. {ECO:0000255}.; TOPO_DOM 440 455 Cytoplasmic…	TRANSMEM 62 82 Helical. {ECO:0000255}.; TRANSMEM 93 113 Helical. {ECO:0000255}.; TRANSMEM 141 161 Helical. {ECO:0000255}.; TRANSMEM 183 203 Helical. {ECO:0000255}.; TRANSMEM 208 228 Helical. {ECO:0000255}.; TRANSMEM 294 314 Helical. {ECO:0000255}.; TRANSMEM 341 361 Helical. {ECO:0000255}.; TRANSMEM 419 439 Helical. {ECO:0000255}.; TRANSMEM 456 476 Helical. {ECO:0000255}.; TRANSMEM 491 511 Helical…	integral component of plasma membrane [GO:0005887]; L-methionine secondary active transmembrane transporter activity [GO:0000102]; cysteine transport [GO:0042883]; L-alpha-amino acid transmembrane transport [GO:1902475]; L-amino acid transport [GO:0015807]; methionine import [GO:0044690]; methionine transport [GO:0015821]; sulfur amino acid transport [GO:0000101]	cysteine transport [GO:0042883]; L-alpha-amino acid transmembrane transport [GO:1902475]; L-amino acid transport [GO:0015807]; methionine import [GO:0044690]; methionine transport [GO:0015821]; sulfur amino acid transport [GO:0000101]	L-methionine secondary active transmembrane transporter activity [GO:0000102]	integral component of plasma membrane [GO:0005887]	GO:1902475; GO:0015807; GO:0000102; GO:0042883; GO:0005887; GO:0044690; GO:0015821; GO:0000101							FUNCTION: High affinity permease for methionine.		4 out of 5		33300;	DIP-7914N;	P50276;	MINT-1357522;
g2433.t1	GK5S-2559	-	2397:1809-3520	GLC	XYL	OK	46.8352	61.7387	0.39858	0.716127	0.3538	0.642816	no	g2433.t1	P36062	AVT3_YEAST	reviewed	Vacuolar amino acid transporter 3	AVT3 YKL146W YKL600	Saccharomyces cerevisiae (strain ATCC 204508 / S288c) (Baker's yeast)	692	AVT3		YKL146W	YKL600		SUBCELLULAR LOCATION: Vacuole membrane {ECO:0000269|PubMed:11274162}; Multi-pass membrane protein {ECO:0000269|PubMed:11274162}.			TRANSMEM 302 322 Helical. {ECO:0000255}.; TRANSMEM 329 349 Helical. {ECO:0000255}.; TRANSMEM 374 394 Helical. {ECO:0000255}.; TRANSMEM 412 432 Helical. {ECO:0000255}.; TRANSMEM 443 463 Helical. {ECO:0000255}.; TRANSMEM 483 503 Helical. {ECO:0000255}.; TRANSMEM 519 539 Helical. {ECO:0000255}.; TRANSMEM 561 581 Helical. {ECO:0000255}.; TRANSMEM 607 627 Helical. {ECO:0000255}.; TRANSMEM 630 650 Heli…	fungal-type vacuole membrane [GO:0000329]; integral component of membrane [GO:0016021]; L-glutamine transmembrane transporter activity [GO:0015186]; L-isoleucine transmembrane transporter activity [GO:0015188]; L-tyrosine transmembrane transporter activity [GO:0005302]; amino acid transmembrane export from vacuole [GO:0032974]; branched-chain amino acid transport [GO:0015803]; cation transmembran…	amino acid transmembrane export from vacuole [GO:0032974]; branched-chain amino acid transport [GO:0015803]; cation transmembrane transport [GO:0098655]; cation transport [GO:0006812]; glutamine transport [GO:0006868]; L-alpha-amino acid transmembrane transport [GO:1902475]; L-amino acid transport [GO:0015807]; neutral amino acid transport [GO:0015804]; tyrosine transport [GO:0015828]	L-glutamine transmembrane transporter activity [GO:0015186]; L-isoleucine transmembrane transporter activity [GO:0015188]; L-tyrosine transmembrane transporter activity [GO:0005302]	fungal-type vacuole membrane [GO:0000329]; integral component of membrane [GO:0016021]	GO:1902475; GO:0015807; GO:0015186; GO:0015188; GO:0005302; GO:0032974; GO:0015803; GO:0098655; GO:0006812; GO:0000329; GO:0006868; GO:0016021; GO:0015804; GO:0015828							FUNCTION: Involved in amino acid efflux from the vacuole to the cytoplasm. Capable of transporting large neutral amino acids including tyrosine, glutamine, asparagine, isoleucine and leucine. {ECO:0000269|PubMed:11274162}.		5 out of 5		33990;	DIP-4105N;		MINT-542142;
g3759.t1	GK5S-1219	-	3593:9158-11130	GLC	XYL	OK	26.4089	33.2512	0.332386	0.560759	0.46145	0.730603	no	g3759.t1	P39923	NPR2_YEAST	reviewed	Nitrogen permease regulator 2	NPR2 YEL062W	Saccharomyces cerevisiae (strain ATCC 204508 / S288c) (Baker's yeast)	615	NPR2		YEL062W			SUBCELLULAR LOCATION: Vacuole membrane {ECO:0000269|PubMed:21454883}; Peripheral membrane protein {ECO:0000269|PubMed:21454883}.				extrinsic component of fungal-type vacuolar membrane [GO:0097042]; Iml1 complex [GO:1990130]; Seh1-associated complex [GO:0035859]; cellular response to amino acid starvation [GO:0034198]; cellular response to nitrogen starvation [GO:0006995]; negative regulation of TOR signaling [GO:0032007]; positive regulation of autophagy [GO:0010508]; proline transport [GO:0015824]; protein transport [GO:001…	cellular response to amino acid starvation [GO:0034198]; cellular response to nitrogen starvation [GO:0006995]; negative regulation of TOR signaling [GO:0032007]; positive regulation of autophagy [GO:0010508]; proline transport [GO:0015824]; protein transport [GO:0015031]; regulation of autophagosome assembly [GO:2000785]; regulation of transcription, DNA-templated [GO:0006355]; response to drug …		extrinsic component of fungal-type vacuolar membrane [GO:0097042]; Iml1 complex [GO:1990130]; Seh1-associated complex [GO:0035859]	GO:1990130; GO:0035859; GO:0034198; GO:0006995; GO:0097042; GO:0032007; GO:0010508; GO:0015824; GO:0015031; GO:2000785; GO:0006355; GO:0042493; GO:0006351; GO:0015840							FUNCTION: Component of the SEA complex which coats the vacuolar membrane and is involved in intracellular trafficking, autophagy, response to nitrogen starvation, and amino acid biogenesis. Mediates inactivation of the TORC1 complex in response to amino acid starvation. Post-transcriptional regulator of nitrogen permeases. May be involved in putative NPR1-dependent phosphorylation of nitrogen per…		5 out of 5		36667;	DIP-1985N;	P39923;	MINT-410477;
g1560.t1	GK5S-3467	-	1636:27162-28897	GLC	XYL	OK	11.1744	13.6091	0.284378	0.416757	0.5916	0.814469	no	g1560.t1	P32837	UGA4_YEAST	reviewed	GABA-specific permease (GABA-specific transport protein)	UGA4 YDL210W D1037	Saccharomyces cerevisiae (strain ATCC 204508 / S288c) (Baker's yeast)	571	UGA4		YDL210W	D1037		SUBCELLULAR LOCATION: Vacuole membrane {ECO:0000269|PubMed:14985124}; Multi-pass membrane protein {ECO:0000269|PubMed:14985124}.		TOPO_DOM 1 73 Cytoplasmic. {ECO:0000255}.; TOPO_DOM 95 105 Vacuolar. {ECO:0000255}.; TOPO_DOM 127 153 Cytoplasmic. {ECO:0000255}.; TOPO_DOM 175 198 Vacuolar. {ECO:0000255}.; TOPO_DOM 220 228 Cytoplasmic. {ECO:0000255}.; TOPO_DOM 250 271 Vacuolar. {ECO:0000255}.; TOPO_DOM 293 312 Cytoplasmic. {ECO:0000255}.; TOPO_DOM 334 364 Vacuolar. {ECO:0000255}.; TOPO_DOM 386 416 Cytoplasmic. {ECO:0000255}.; T…	TRANSMEM 74 94 Helical. {ECO:0000255}.; TRANSMEM 106 126 Helical. {ECO:0000255}.; TRANSMEM 154 174 Helical. {ECO:0000255}.; TRANSMEM 199 219 Helical. {ECO:0000255}.; TRANSMEM 229 249 Helical. {ECO:0000255}.; TRANSMEM 272 292 Helical. {ECO:0000255}.; TRANSMEM 313 333 Helical. {ECO:0000255}.; TRANSMEM 365 385 Helical. {ECO:0000255}.; TRANSMEM 417 437 Helical. {ECO:0000255}.; TRANSMEM 442 462 Helica…	fungal-type vacuole membrane [GO:0000329]; integral component of membrane [GO:0016021]; gamma-aminobutyric acid:proton symporter activity [GO:0015495]; putrescine transmembrane transporter activity [GO:0015489]; gamma-aminobutyric acid transport [GO:0015812]; putrescine transport [GO:0015847]; transmembrane transport [GO:0055085]	gamma-aminobutyric acid transport [GO:0015812]; putrescine transport [GO:0015847]; transmembrane transport [GO:0055085]	gamma-aminobutyric acid:proton symporter activity [GO:0015495]; putrescine transmembrane transporter activity [GO:0015489]	fungal-type vacuole membrane [GO:0000329]; integral component of membrane [GO:0016021]	GO:0000329; GO:0015812; GO:0015495; GO:0016021; GO:0015489; GO:0015847; GO:0055085							FUNCTION: Required for high-affinity, high-specificity GABA transport. Also transports putrescine. {ECO:0000269|PubMed:14985124}.		4 out of 5		31836;	DIP-1857N;	P32837;	MINT-409806;
g3525.t1	GK5S-1456	-	3322:17472-19180	GLC	XYL	OK	19.8247	23.24	0.229305	0.374678	0.63795	0.836275	no	g3525.t1	P15380	PUT4_YEAST	reviewed	Proline-specific permease	PUT4 YOR348C O6345	Saccharomyces cerevisiae (strain ATCC 204508 / S288c) (Baker's yeast)	627	PUT4		YOR348C	O6345		SUBCELLULAR LOCATION: Membrane; Multi-pass membrane protein.			TRANSMEM 115 136 Helical. {ECO:0000255}.; TRANSMEM 142 162 Helical. {ECO:0000255}.; TRANSMEM 191 210 Helical. {ECO:0000255}.; TRANSMEM 229 247 Helical. {ECO:0000255}.; TRANSMEM 262 281 Helical. {ECO:0000255}.; TRANSMEM 306 326 Helical. {ECO:0000255}.; TRANSMEM 351 370 Helical. {ECO:0000255}.; TRANSMEM 408 427 Helical. {ECO:0000255}.; TRANSMEM 455 473 Helical. {ECO:0000255}.; TRANSMEM 483 503 Heli…	integral component of membrane [GO:0016021]; plasma membrane [GO:0005886]; L-proline transmembrane transporter activity [GO:0015193]; neutral amino acid transmembrane transporter activity [GO:0015175]; gamma-aminobutyric acid transport [GO:0015812]; neutral amino acid transport [GO:0015804]; proline transmembrane transport [GO:0035524]; proline transport [GO:0015824]	gamma-aminobutyric acid transport [GO:0015812]; neutral amino acid transport [GO:0015804]; proline transmembrane transport [GO:0035524]; proline transport [GO:0015824]	L-proline transmembrane transporter activity [GO:0015193]; neutral amino acid transmembrane transporter activity [GO:0015175]	integral component of membrane [GO:0016021]; plasma membrane [GO:0005886]	GO:0015193; GO:0015812; GO:0016021; GO:0015175; GO:0015804; GO:0005886; GO:0035524; GO:0015824							FUNCTION: Required for high-affinity proline transport. May be responsible for proline recognition and probably also for proline translocation across the plasma membrane. Also function as non-specific GABA permease. Can also transport alanine and glycine. {ECO:0000269|PubMed:10654085}.		4 out of 5		34733;	DIP-1541N;	P15380;	MINT-394548;
g4330.t1	GK5S-635	-	4319:3849-5164	GLC	XYL	OK	82.5715	96.1488	0.219625	0.408372	0.6089	0.823253	no	g4330.t1	P25621	FEN2_YEAST	reviewed	Pantothenate transporter FEN2 (Fenpropimorph resistance protein 2)	FEN2 YCR028C YCR28C	Saccharomyces cerevisiae (strain ATCC 204508 / S288c) (Baker's yeast)	512	FEN2		YCR028C	YCR28C		SUBCELLULAR LOCATION: Cell membrane {ECO:0000269|PubMed:10373490}; Multi-pass membrane protein {ECO:0000269|PubMed:10373490}.		TOPO_DOM 1 27 Cytoplasmic. {ECO:0000255}.; TOPO_DOM 49 79 Extracellular. {ECO:0000255}.; TOPO_DOM 101 102 Cytoplasmic. {ECO:0000255}.; TOPO_DOM 124 132 Extracellular. {ECO:0000255}.; TOPO_DOM 154 164 Cytoplasmic. {ECO:0000255}.; TOPO_DOM 186 198 Extracellular. {ECO:0000255}.; TOPO_DOM 220 271 Cytoplasmic. {ECO:0000255}.; TOPO_DOM 293 312 Extracellular. {ECO:0000255}.; TOPO_DOM 334 342 Cytoplasmic…	TRANSMEM 28 48 Helical. {ECO:0000255}.; TRANSMEM 80 100 Helical. {ECO:0000255}.; TRANSMEM 103 123 Helical. {ECO:0000255}.; TRANSMEM 133 153 Helical. {ECO:0000255}.; TRANSMEM 165 185 Helical. {ECO:0000255}.; TRANSMEM 199 219 Helical. {ECO:0000255}.; TRANSMEM 272 292 Helical. {ECO:0000255}.; TRANSMEM 313 333 Helical. {ECO:0000255}.; TRANSMEM 343 363 Helical. {ECO:0000255}.; TRANSMEM 373 393 Helical…	integral component of membrane [GO:0016021]; plasma membrane [GO:0005886]; pantothenate transmembrane transporter activity [GO:0015233]; endocytosis [GO:0006897]; pantothenate transmembrane transport [GO:0015887]	endocytosis [GO:0006897]; pantothenate transmembrane transport [GO:0015887]	pantothenate transmembrane transporter activity [GO:0015233]	integral component of membrane [GO:0016021]; plasma membrane [GO:0005886]	GO:0006897; GO:0016021; GO:0015887; GO:0015233; GO:0005886							FUNCTION: Transports pantothenate into the cell. Also involved in the catabolite repression-mediated regulation of ergosterol biosynthesis and in fenpropimorph resistance. {ECO:0000269|PubMed:10373490, ECO:0000269|PubMed:8771708}.		3 out of 5		31011;	DIP-7672N;	P25621;	MINT-1357147;
g205.t1	GK5S-4861	-	227:78776-80520	GLC	XYL	OK	17.0827	19.2546	0.172667	0.271802	0.72515	0.885415	no	g205.t1	P25376	AGP1_YEAST	reviewed	General amino acid permease AGP1 (Asparagine/glutamine permease)	AGP1 YCL025C YCL25C	Saccharomyces cerevisiae (strain ATCC 204508 / S288c) (Baker's yeast)	633	AGP1		YCL025C	YCL25C		SUBCELLULAR LOCATION: Cell membrane {ECO:0000250}; Multi-pass membrane protein {ECO:0000250}.		TOPO_DOM 1 124 Cytoplasmic. {ECO:0000255}.; TOPO_DOM 146 148 Extracellular. {ECO:0000255}.; TOPO_DOM 170 197 Cytoplasmic. {ECO:0000255}.; TOPO_DOM 219 231 Extracellular. {ECO:0000255}.; TOPO_DOM 253 260 Cytoplasmic. {ECO:0000255}.; TOPO_DOM 282 313 Extracellular. {ECO:0000255}.; TOPO_DOM 335 352 Cytoplasmic. {ECO:0000255}.; TOPO_DOM 374 402 Extracellular. {ECO:0000255}.; TOPO_DOM 426 452 Cytoplas…	TRANSMEM 125 145 Helical. {ECO:0000255}.; TRANSMEM 149 169 Helical. {ECO:0000255}.; TRANSMEM 198 218 Helical. {ECO:0000255}.; TRANSMEM 232 252 Helical. {ECO:0000255}.; TRANSMEM 261 281 Helical. {ECO:0000255}.; TRANSMEM 314 334 Helical. {ECO:0000255}.; TRANSMEM 353 373 Helical. {ECO:0000255}.; TRANSMEM 403 425 Helical. {ECO:0000255}.; TRANSMEM 453 473 Helical. {ECO:0000255}.; TRANSMEM 478 498 Heli…	integral component of membrane [GO:0016021]; plasma membrane [GO:0005886]; amino acid transmembrane transporter activity [GO:0015171]; L-phenylalanine transmembrane transporter activity [GO:0015192]; L-proline transmembrane transporter activity [GO:0015193]; amino acid transport [GO:0006865]; phenylalanine transport [GO:0015823]; proline transmembrane transport [GO:0035524]; transmembrane transpo…	amino acid transport [GO:0006865]; phenylalanine transport [GO:0015823]; proline transmembrane transport [GO:0035524]; transmembrane transport [GO:0055085]	amino acid transmembrane transporter activity [GO:0015171]; L-phenylalanine transmembrane transporter activity [GO:0015192]; L-proline transmembrane transporter activity [GO:0015193]	integral component of membrane [GO:0016021]; plasma membrane [GO:0005886]	GO:0015192; GO:0015193; GO:0015171; GO:0006865; GO:0016021; GO:0015823; GO:0005886; GO:0035524; GO:0055085							FUNCTION: Broad substrate range permease which transports asparagine and glutamine with intermediate specificity. Also transports Ala, Cys, Gly, Ile, Leu, Met, Phe, Ser, Thr, Tyr and Val. Important for the utilization of amino acids as a nitrogen source. {ECO:0000269|PubMed:10467005, ECO:0000269|PubMed:10654085}.		5 out of 5	PTM: Palmitoylated by PFA4. {ECO:0000269|PubMed:16751107}.	30959;	DIP-4973N;	P25376;	MINT-566554;
g2733.t1	GK5S-2250	-	2601:3292-4823	GLC	XYL	OK	22.9693	25.5674	0.154597	0.252263	0.7497	0.896292	no	g2733.t1	P25621	FEN2_YEAST	reviewed	Pantothenate transporter FEN2 (Fenpropimorph resistance protein 2)	FEN2 YCR028C YCR28C	Saccharomyces cerevisiae (strain ATCC 204508 / S288c) (Baker's yeast)	512	FEN2		YCR028C	YCR28C		SUBCELLULAR LOCATION: Cell membrane {ECO:0000269|PubMed:10373490}; Multi-pass membrane protein {ECO:0000269|PubMed:10373490}.		TOPO_DOM 1 27 Cytoplasmic. {ECO:0000255}.; TOPO_DOM 49 79 Extracellular. {ECO:0000255}.; TOPO_DOM 101 102 Cytoplasmic. {ECO:0000255}.; TOPO_DOM 124 132 Extracellular. {ECO:0000255}.; TOPO_DOM 154 164 Cytoplasmic. {ECO:0000255}.; TOPO_DOM 186 198 Extracellular. {ECO:0000255}.; TOPO_DOM 220 271 Cytoplasmic. {ECO:0000255}.; TOPO_DOM 293 312 Extracellular. {ECO:0000255}.; TOPO_DOM 334 342 Cytoplasmic…	TRANSMEM 28 48 Helical. {ECO:0000255}.; TRANSMEM 80 100 Helical. {ECO:0000255}.; TRANSMEM 103 123 Helical. {ECO:0000255}.; TRANSMEM 133 153 Helical. {ECO:0000255}.; TRANSMEM 165 185 Helical. {ECO:0000255}.; TRANSMEM 199 219 Helical. {ECO:0000255}.; TRANSMEM 272 292 Helical. {ECO:0000255}.; TRANSMEM 313 333 Helical. {ECO:0000255}.; TRANSMEM 343 363 Helical. {ECO:0000255}.; TRANSMEM 373 393 Helical…	integral component of membrane [GO:0016021]; plasma membrane [GO:0005886]; pantothenate transmembrane transporter activity [GO:0015233]; endocytosis [GO:0006897]; pantothenate transmembrane transport [GO:0015887]	endocytosis [GO:0006897]; pantothenate transmembrane transport [GO:0015887]	pantothenate transmembrane transporter activity [GO:0015233]	integral component of membrane [GO:0016021]; plasma membrane [GO:0005886]	GO:0006897; GO:0016021; GO:0015887; GO:0015233; GO:0005886							FUNCTION: Transports pantothenate into the cell. Also involved in the catabolite repression-mediated regulation of ergosterol biosynthesis and in fenpropimorph resistance. {ECO:0000269|PubMed:10373490, ECO:0000269|PubMed:8771708}.		3 out of 5		31011;	DIP-7672N;	P25621;	MINT-1357147;
g3626.t1	GK5S-1348	-	3426:5771-7521	GLC	XYL	OK	62.2358	67.1087	0.108755	0.194767	0.8036	0.922162	no	g3626.t1	Q08986	SAM3_YEAST	reviewed	S-adenosylmethionine permease SAM3 (S-adenosylmethionine metabolism protein 3)	SAM3 YPL274W	Saccharomyces cerevisiae (strain ATCC 204508 / S288c) (Baker's yeast)	587	SAM3		YPL274W			SUBCELLULAR LOCATION: Membrane {ECO:0000269|PubMed:14562095}; Multi-pass membrane protein {ECO:0000269|PubMed:14562095}. Endoplasmic reticulum {ECO:0000269|PubMed:14562095}.		TOPO_DOM 1 80 Cytoplasmic. {ECO:0000255}.; TOPO_DOM 104 109 Extracellular. {ECO:0000255}.; TOPO_DOM 130 162 Cytoplasmic. {ECO:0000255}.; TOPO_DOM 184 186 Extracellular. {ECO:0000255}.; TOPO_DOM 208 219 Cytoplasmic. {ECO:0000255}.; TOPO_DOM 241 266 Extracellular. {ECO:0000255}.; TOPO_DOM 288 302 Cytoplasmic. {ECO:0000255}.; TOPO_DOM 324 360 Extracellular. {ECO:0000255}.; TOPO_DOM 382 406 Cytoplasm…	TRANSMEM 81 103 Helical. {ECO:0000255}.; TRANSMEM 110 129 Helical. {ECO:0000255}.; TRANSMEM 163 183 Helical. {ECO:0000255}.; TRANSMEM 187 207 Helical. {ECO:0000255}.; TRANSMEM 220 240 Helical. {ECO:0000255}.; TRANSMEM 267 287 Helical. {ECO:0000255}.; TRANSMEM 303 323 Helical. {ECO:0000255}.; TRANSMEM 361 381 Helical. {ECO:0000255}.; TRANSMEM 407 427 Helical. {ECO:0000255}.; TRANSMEM 432 452 Helic…	endoplasmic reticulum [GO:0005783]; integral component of membrane [GO:0016021]; plasma membrane [GO:0005886]; amino acid transmembrane transporter activity [GO:0015171]; putrescine transmembrane transporter activity [GO:0015489]; S-adenosyl-L-methionine transmembrane transporter activity [GO:0000095]; spermidine transmembrane transporter activity [GO:0015606]; putrescine transport [GO:0015847]; …	putrescine transport [GO:0015847]; S-adenosyl-L-methionine transmembrane transport [GO:1901962]; S-adenosyl-L-methionine transport [GO:0015805]; spermidine transmembrane transport [GO:1903711]; spermidine transport [GO:0015848]	amino acid transmembrane transporter activity [GO:0015171]; putrescine transmembrane transporter activity [GO:0015489]; S-adenosyl-L-methionine transmembrane transporter activity [GO:0000095]; spermidine transmembrane transporter activity [GO:0015606]	endoplasmic reticulum [GO:0005783]; integral component of membrane [GO:0016021]; plasma membrane [GO:0005886]	GO:1901962; GO:0000095; GO:0015805; GO:0015171; GO:0005783; GO:0016021; GO:0005886; GO:0015489; GO:0015847; GO:1903711; GO:0015606; GO:0015848							FUNCTION: High-affinity S-adenosylmethionine permease, required for utilization of S-adenosylmethionine as a sulfur source. {ECO:0000269|PubMed:10497160}.		5 out of 5		35939;	DIP-8874N;		MINT-4505753;
g3345.t1	GK5S-1628	-	3162:198-1105	GLC	XYL	OK	242.171	253.926	0.0683799	0.143644	0.8616	0.950612	no	g3345.t1	Q06328	YPQ2_YEAST	reviewed	Probable vacuolar amino acid transporter YPQ2 (PQ-loop repeat-containing protein 2)	YPQ2 YDR352W	Saccharomyces cerevisiae (strain ATCC 204508 / S288c) (Baker's yeast)	317	YPQ2		YDR352W			SUBCELLULAR LOCATION: Vacuole membrane {ECO:0000269|PubMed:14562095, ECO:0000269|PubMed:23169667}; Multi-pass membrane protein {ECO:0000269|PubMed:14562095, ECO:0000269|PubMed:23169667}.		TOPO_DOM 1 13 Vacuolar. {ECO:0000255}.; TOPO_DOM 35 39 Cytoplasmic. {ECO:0000255}.; TOPO_DOM 63 71 Vacuolar. {ECO:0000255}.; TOPO_DOM 95 143 Cytoplasmic. {ECO:0000255}.; TOPO_DOM 165 184 Vacuolar. {ECO:0000255}.; TOPO_DOM 206 215 Cytoplasmic. {ECO:0000255}.; TOPO_DOM 237 249 Vacuolar. {ECO:0000255}.; TOPO_DOM 271 317 Cytoplasmic. {ECO:0000255}.	TRANSMEM 14 34 Helical. {ECO:0000255}.; TRANSMEM 40 62 Helical. {ECO:0000255}.; TRANSMEM 72 94 Helical. {ECO:0000255}.; TRANSMEM 144 164 Helical. {ECO:0000255}.; TRANSMEM 185 205 Helical. {ECO:0000255}.; TRANSMEM 216 236 Helical. {ECO:0000255}.; TRANSMEM 250 270 Helical. {ECO:0000255}.	integral component of fungal-type vacuolar membrane [GO:0071627]; basic amino acid transmembrane transporter activity [GO:0015174]; basic amino acid transmembrane export from vacuole [GO:0034488]	basic amino acid transmembrane export from vacuole [GO:0034488]	basic amino acid transmembrane transporter activity [GO:0015174]	integral component of fungal-type vacuolar membrane [GO:0071627]	GO:0034488; GO:0015174; GO:0071627		DOMAIN 8 71 PQ-loop 1.; DOMAIN 185 247 PQ-loop 2.					FUNCTION: May function as an amino acid transporter mediating the export of cationic amino acids from the vacuole. {ECO:0000269|PubMed:23169667}.		4 out of 5		32409;		Q06328;	MINT-4482157;
g1167.t1	GK5S-3860	-	1270:22765-24200	GLC	XYL	OK	82.3012	85.9798	0.0630837	0.118963	0.88235	0.956703	no	g1167.t1	P40501	AVT7_YEAST	reviewed	Vacuolar amino acid transporter 7	AVT7 YIL088C	Saccharomyces cerevisiae (strain ATCC 204508 / S288c) (Baker's yeast)	490	AVT7		YIL088C			SUBCELLULAR LOCATION: Vacuole membrane {ECO:0000269|PubMed:11274162}; Multi-pass membrane protein {ECO:0000269|PubMed:11274162}.		TOPO_DOM 1 6 Cytoplasmic. {ECO:0000255}.; TOPO_DOM 28 34 Vacuolar. {ECO:0000255}.; TOPO_DOM 56 84 Cytoplasmic. {ECO:0000255}.; TOPO_DOM 106 108 Vacuolar. {ECO:0000255}.; TOPO_DOM 130 143 Cytoplasmic. {ECO:0000255}.; TOPO_DOM 165 190 Vacuolar. {ECO:0000255}.; TOPO_DOM 212 221 Cytoplasmic. {ECO:0000255}.; TOPO_DOM 243 264 Vacuolar. {ECO:0000255}.; TOPO_DOM 286 397 Cytoplasmic. {ECO:0000255}.; TOPO_…	TRANSMEM 7 27 Helical. {ECO:0000255}.; TRANSMEM 35 55 Helical. {ECO:0000255}.; TRANSMEM 85 105 Helical. {ECO:0000255}.; TRANSMEM 109 129 Helical. {ECO:0000255}.; TRANSMEM 144 164 Helical. {ECO:0000255}.; TRANSMEM 191 211 Helical. {ECO:0000255}.; TRANSMEM 222 242 Helical. {ECO:0000255}.; TRANSMEM 265 285 Helical. {ECO:0000255}.; TRANSMEM 398 418 Helical. {ECO:0000255}.; TRANSMEM 429 449 Helical. {…	fungal-type vacuole [GO:0000324]; integral component of membrane [GO:0016021]; plasma membrane [GO:0005886]; vacuolar membrane [GO:0005774]; amino acid transmembrane transporter activity [GO:0015171]; amino acid transmembrane transport [GO:0003333]; amino acid transport [GO:0006865]	amino acid transmembrane transport [GO:0003333]; amino acid transport [GO:0006865]	amino acid transmembrane transporter activity [GO:0015171]	fungal-type vacuole [GO:0000324]; integral component of membrane [GO:0016021]; plasma membrane [GO:0005886]; vacuolar membrane [GO:0005774]	GO:0003333; GO:0015171; GO:0006865; GO:0000324; GO:0016021; GO:0005886; GO:0005774							FUNCTION: Probable amino acid transporter of unknown specificity. {ECO:0000269|PubMed:11274162}.		3 out of 5		34905;	DIP-7299N;		MINT-4489877;
g1511.t1	GK5S-3500	-	1595:2639-4038	GLC	XYL	OK	111.035	114.164	0.0400923	0.0775692	0.92355	0.971548	no	g1511.t1	P40074	AVT6_YEAST	reviewed	Vacuolar amino acid transporter 6	AVT6 YER119C	Saccharomyces cerevisiae (strain ATCC 204508 / S288c) (Baker's yeast)	448	AVT6		YER119C			SUBCELLULAR LOCATION: Vacuole membrane {ECO:0000269|PubMed:11274162}; Multi-pass membrane protein {ECO:0000269|PubMed:11274162}.		TOPO_DOM 1 7 Cytoplasmic. {ECO:0000255}.; TOPO_DOM 29 32 Vacuolar. {ECO:0000255}.; TOPO_DOM 54 80 Cytoplasmic. {ECO:0000255}.; TOPO_DOM 102 125 Vacuolar. {ECO:0000255}.; TOPO_DOM 147 150 Cytoplasmic. {ECO:0000255}.; TOPO_DOM 172 195 Vacuolar. {ECO:0000255}.; TOPO_DOM 217 229 Cytoplasmic. {ECO:0000255}.; TOPO_DOM 251 267 Vacuolar. {ECO:0000255}.; TOPO_DOM 289 357 Cytoplasmic. {ECO:0000255}.; TOPO_…	TRANSMEM 8 28 Helical. {ECO:0000255}.; TRANSMEM 33 53 Helical. {ECO:0000255}.; TRANSMEM 81 101 Helical. {ECO:0000255}.; TRANSMEM 126 146 Helical. {ECO:0000255}.; TRANSMEM 151 171 Helical. {ECO:0000255}.; TRANSMEM 196 216 Helical. {ECO:0000255}.; TRANSMEM 230 250 Helical. {ECO:0000255}.; TRANSMEM 268 288 Helical. {ECO:0000255}.; TRANSMEM 358 378 Helical. {ECO:0000255}.; TRANSMEM 382 402 Helical. {…	fungal-type vacuole [GO:0000324]; fungal-type vacuole membrane [GO:0000329]; integral component of membrane [GO:0016021]; L-aspartate transmembrane transporter activity [GO:0015183]; L-glutamate transmembrane transporter activity [GO:0005313]; amino acid transmembrane export from vacuole [GO:0032974]; L-aspartate transmembrane transport [GO:0089712]; L-glutamate transmembrane transport [GO:008971…	amino acid transmembrane export from vacuole [GO:0032974]; L-aspartate transmembrane transport [GO:0089712]; L-glutamate transmembrane transport [GO:0089711]; transmembrane transport [GO:0055085]	L-aspartate transmembrane transporter activity [GO:0015183]; L-glutamate transmembrane transporter activity [GO:0005313]	fungal-type vacuole [GO:0000324]; fungal-type vacuole membrane [GO:0000329]; integral component of membrane [GO:0016021]	GO:0089712; GO:0015183; GO:0089711; GO:0005313; GO:0032974; GO:0000324; GO:0000329; GO:0016021; GO:0055085							FUNCTION: Involved in amino acid efflux from the vacuole to the cytoplasm. Capable of transporting aspartate and glutamate. Requires ATP for function. {ECO:0000269|PubMed:11274162}.		5 out of 5		36864;	DIP-4489N;	P40074;	MINT-478670;
g3681.t1	GK5S-1295	-	3505:3906-4549	GLC	XYL	NOTEST	0	0	0	0	1	1	no	g3681.t1	P36172	VBA5_YEAST	reviewed	Vacuolar basic amino acid transporter 5	VBA5 YKR105C	Saccharomyces cerevisiae (strain ATCC 204508 / S288c) (Baker's yeast)	582	VBA5		YKR105C			SUBCELLULAR LOCATION: Vacuole membrane {ECO:0000250}; Multi-pass membrane protein {ECO:0000250}.		TOPO_DOM 1 44 Cytoplasmic. {ECO:0000250}.; TOPO_DOM 66 80 Vacuolar. {ECO:0000250}.; TOPO_DOM 102 104 Cytoplasmic. {ECO:0000250}.; TOPO_DOM 126 132 Vacuolar. {ECO:0000250}.; TOPO_DOM 154 160 Cytoplasmic. {ECO:0000250}.; TOPO_DOM 182 191 Vacuolar. {ECO:0000250}.; TOPO_DOM 213 256 Cytoplasmic. {ECO:0000250}.; TOPO_DOM 278 287 Vacuolar. {ECO:0000250}.; TOPO_DOM 309 329 Cytoplasmic. {ECO:0000250}.; TO…	TRANSMEM 45 65 Helical. {ECO:0000255}.; TRANSMEM 81 101 Helical. {ECO:0000255}.; TRANSMEM 105 125 Helical. {ECO:0000255}.; TRANSMEM 133 153 Helical. {ECO:0000255}.; TRANSMEM 161 181 Helical. {ECO:0000255}.; TRANSMEM 192 212 Helical. {ECO:0000255}.; TRANSMEM 257 277 Helical. {ECO:0000255}.; TRANSMEM 288 308 Helical. {ECO:0000255}.; TRANSMEM 330 350 Helical. {ECO:0000255}.; TRANSMEM 373 393 Helical…	integral component of membrane [GO:0016021]; plasma membrane [GO:0005886]; vacuolar membrane [GO:0005774]; transmembrane transporter activity [GO:0022857]; arginine transport [GO:0015809]	arginine transport [GO:0015809]	transmembrane transporter activity [GO:0022857]	integral component of membrane [GO:0016021]; plasma membrane [GO:0005886]; vacuolar membrane [GO:0005774]	GO:0015809; GO:0016021; GO:0005886; GO:0022857; GO:0005774							FUNCTION: Transporter required for vacuolar uptake of basic amino acids. {ECO:0000269|PubMed:15572352}.		3 out of 5		34236;	DIP-5086N;	P36172;	MINT-532761;
g988.t1	GK5S-4037	-	1055:10085-11805	GLC	XYL	OK	29.4649	27.8056	-0.0836233	-0.136843	0.86205	0.950612	no	g988.t1	P15380	PUT4_YEAST	reviewed	Proline-specific permease	PUT4 YOR348C O6345	Saccharomyces cerevisiae (strain ATCC 204508 / S288c) (Baker's yeast)	627	PUT4		YOR348C	O6345		SUBCELLULAR LOCATION: Membrane; Multi-pass membrane protein.			TRANSMEM 115 136 Helical. {ECO:0000255}.; TRANSMEM 142 162 Helical. {ECO:0000255}.; TRANSMEM 191 210 Helical. {ECO:0000255}.; TRANSMEM 229 247 Helical. {ECO:0000255}.; TRANSMEM 262 281 Helical. {ECO:0000255}.; TRANSMEM 306 326 Helical. {ECO:0000255}.; TRANSMEM 351 370 Helical. {ECO:0000255}.; TRANSMEM 408 427 Helical. {ECO:0000255}.; TRANSMEM 455 473 Helical. {ECO:0000255}.; TRANSMEM 483 503 Heli…	integral component of membrane [GO:0016021]; plasma membrane [GO:0005886]; L-proline transmembrane transporter activity [GO:0015193]; neutral amino acid transmembrane transporter activity [GO:0015175]; gamma-aminobutyric acid transport [GO:0015812]; neutral amino acid transport [GO:0015804]; proline transmembrane transport [GO:0035524]; proline transport [GO:0015824]	gamma-aminobutyric acid transport [GO:0015812]; neutral amino acid transport [GO:0015804]; proline transmembrane transport [GO:0035524]; proline transport [GO:0015824]	L-proline transmembrane transporter activity [GO:0015193]; neutral amino acid transmembrane transporter activity [GO:0015175]	integral component of membrane [GO:0016021]; plasma membrane [GO:0005886]	GO:0015193; GO:0015812; GO:0016021; GO:0015175; GO:0015804; GO:0005886; GO:0035524; GO:0015824							FUNCTION: Required for high-affinity proline transport. May be responsible for proline recognition and probably also for proline translocation across the plasma membrane. Also function as non-specific GABA permease. Can also transport alanine and glycine. {ECO:0000269|PubMed:10654085}.		4 out of 5		34733;	DIP-1541N;	P15380;	MINT-394548;
g4286.t1	GK5S-683	-	4297:324-1216	GLC	XYL	OK	25.6354	24.1267	-0.0875055	-0.141506	0.87075	0.952491	no	g4286.t1	P25621	FEN2_YEAST	reviewed	Pantothenate transporter FEN2 (Fenpropimorph resistance protein 2)	FEN2 YCR028C YCR28C	Saccharomyces cerevisiae (strain ATCC 204508 / S288c) (Baker's yeast)	512	FEN2		YCR028C	YCR28C		SUBCELLULAR LOCATION: Cell membrane {ECO:0000269|PubMed:10373490}; Multi-pass membrane protein {ECO:0000269|PubMed:10373490}.		TOPO_DOM 1 27 Cytoplasmic. {ECO:0000255}.; TOPO_DOM 49 79 Extracellular. {ECO:0000255}.; TOPO_DOM 101 102 Cytoplasmic. {ECO:0000255}.; TOPO_DOM 124 132 Extracellular. {ECO:0000255}.; TOPO_DOM 154 164 Cytoplasmic. {ECO:0000255}.; TOPO_DOM 186 198 Extracellular. {ECO:0000255}.; TOPO_DOM 220 271 Cytoplasmic. {ECO:0000255}.; TOPO_DOM 293 312 Extracellular. {ECO:0000255}.; TOPO_DOM 334 342 Cytoplasmic…	TRANSMEM 28 48 Helical. {ECO:0000255}.; TRANSMEM 80 100 Helical. {ECO:0000255}.; TRANSMEM 103 123 Helical. {ECO:0000255}.; TRANSMEM 133 153 Helical. {ECO:0000255}.; TRANSMEM 165 185 Helical. {ECO:0000255}.; TRANSMEM 199 219 Helical. {ECO:0000255}.; TRANSMEM 272 292 Helical. {ECO:0000255}.; TRANSMEM 313 333 Helical. {ECO:0000255}.; TRANSMEM 343 363 Helical. {ECO:0000255}.; TRANSMEM 373 393 Helical…	integral component of membrane [GO:0016021]; plasma membrane [GO:0005886]; pantothenate transmembrane transporter activity [GO:0015233]; endocytosis [GO:0006897]; pantothenate transmembrane transport [GO:0015887]	endocytosis [GO:0006897]; pantothenate transmembrane transport [GO:0015887]	pantothenate transmembrane transporter activity [GO:0015233]	integral component of membrane [GO:0016021]; plasma membrane [GO:0005886]	GO:0006897; GO:0016021; GO:0015887; GO:0015233; GO:0005886							FUNCTION: Transports pantothenate into the cell. Also involved in the catabolite repression-mediated regulation of ergosterol biosynthesis and in fenpropimorph resistance. {ECO:0000269|PubMed:10373490, ECO:0000269|PubMed:8771708}.		3 out of 5		31011;	DIP-7672N;	P25621;	MINT-1357147;
g4884.t1	GK5S-70	-	5011:1232-3405	GLC	XYL	OK	54.1014	42.5648	-0.346006	-0.619638	0.4174	0.69409	no	g4884.t1	P50944	AVT4_YEAST	reviewed	Vacuolar amino acid transporter 4	AVT4 YNL101W N2185	Saccharomyces cerevisiae (strain ATCC 204508 / S288c) (Baker's yeast)	713	AVT4		YNL101W	N2185		SUBCELLULAR LOCATION: Vacuole membrane {ECO:0000269|PubMed:11274162}; Multi-pass membrane protein {ECO:0000269|PubMed:11274162}.		TOPO_DOM 1 242 Vacuolar. {ECO:0000255}.; TOPO_DOM 264 301 Cytoplasmic. {ECO:0000255}.; TOPO_DOM 323 326 Vacuolar. {ECO:0000255}.; TOPO_DOM 348 373 Cytoplasmic. {ECO:0000255}.; TOPO_DOM 395 410 Vacuolar. {ECO:0000255}.; TOPO_DOM 432 438 Cytoplasmic. {ECO:0000255}.; TOPO_DOM 460 483 Vacuolar. {ECO:0000255}.; TOPO_DOM 505 515 Cytoplasmic. {ECO:0000255}.; TOPO_DOM 537 561 Vacuolar. {ECO:0000255}.; TO…	TRANSMEM 243 263 Helical. {ECO:0000255}.; TRANSMEM 302 322 Helical. {ECO:0000255}.; TRANSMEM 327 347 Helical. {ECO:0000255}.; TRANSMEM 374 394 Helical. {ECO:0000255}.; TRANSMEM 411 431 Helical. {ECO:0000255}.; TRANSMEM 439 459 Helical. {ECO:0000255}.; TRANSMEM 484 504 Helical. {ECO:0000255}.; TRANSMEM 516 536 Helical. {ECO:0000255}.; TRANSMEM 562 582 Helical. {ECO:0000255}.; TRANSMEM 622 642 Heli…	fungal-type vacuole [GO:0000324]; fungal-type vacuole membrane [GO:0000329]; integral component of membrane [GO:0016021]; L-glutamine transmembrane transporter activity [GO:0015186]; L-isoleucine transmembrane transporter activity [GO:0015188]; L-tyrosine transmembrane transporter activity [GO:0005302]; amino acid transmembrane export from vacuole [GO:0032974]; branched-chain amino acid transport…	amino acid transmembrane export from vacuole [GO:0032974]; branched-chain amino acid transport [GO:0015803]; cation transmembrane transport [GO:0098655]; cation transport [GO:0006812]; glutamine transport [GO:0006868]; L-alpha-amino acid transmembrane transport [GO:1902475]; L-amino acid transport [GO:0015807]; neutral amino acid transport [GO:0015804]; tyrosine transport [GO:0015828]	L-glutamine transmembrane transporter activity [GO:0015186]; L-isoleucine transmembrane transporter activity [GO:0015188]; L-tyrosine transmembrane transporter activity [GO:0005302]	fungal-type vacuole [GO:0000324]; fungal-type vacuole membrane [GO:0000329]; integral component of membrane [GO:0016021]	GO:1902475; GO:0015807; GO:0015186; GO:0015188; GO:0005302; GO:0032974; GO:0015803; GO:0098655; GO:0006812; GO:0000324; GO:0000329; GO:0006868; GO:0016021; GO:0015804; GO:0015828							FUNCTION: Involved in amino acid efflux from the vacuole to the cytoplasm. Capable of transporting large neutral amino acids including tyrosine, glutamine, asparagine, isoleucine and leucine. {ECO:0000269|PubMed:11274162}.		5 out of 5		35722;	DIP-6754N;	P50944;	MINT-671686;
g443.t1	GK5S-4582	-	471:110-1353	GLC	XYL	OK	88.896	66.5902	-0.416809	-0.742164	0.356	0.643982	no	g443.t1	P32837	UGA4_YEAST	reviewed	GABA-specific permease (GABA-specific transport protein)	UGA4 YDL210W D1037	Saccharomyces cerevisiae (strain ATCC 204508 / S288c) (Baker's yeast)	571	UGA4		YDL210W	D1037		SUBCELLULAR LOCATION: Vacuole membrane {ECO:0000269|PubMed:14985124}; Multi-pass membrane protein {ECO:0000269|PubMed:14985124}.		TOPO_DOM 1 73 Cytoplasmic. {ECO:0000255}.; TOPO_DOM 95 105 Vacuolar. {ECO:0000255}.; TOPO_DOM 127 153 Cytoplasmic. {ECO:0000255}.; TOPO_DOM 175 198 Vacuolar. {ECO:0000255}.; TOPO_DOM 220 228 Cytoplasmic. {ECO:0000255}.; TOPO_DOM 250 271 Vacuolar. {ECO:0000255}.; TOPO_DOM 293 312 Cytoplasmic. {ECO:0000255}.; TOPO_DOM 334 364 Vacuolar. {ECO:0000255}.; TOPO_DOM 386 416 Cytoplasmic. {ECO:0000255}.; T…	TRANSMEM 74 94 Helical. {ECO:0000255}.; TRANSMEM 106 126 Helical. {ECO:0000255}.; TRANSMEM 154 174 Helical. {ECO:0000255}.; TRANSMEM 199 219 Helical. {ECO:0000255}.; TRANSMEM 229 249 Helical. {ECO:0000255}.; TRANSMEM 272 292 Helical. {ECO:0000255}.; TRANSMEM 313 333 Helical. {ECO:0000255}.; TRANSMEM 365 385 Helical. {ECO:0000255}.; TRANSMEM 417 437 Helical. {ECO:0000255}.; TRANSMEM 442 462 Helica…	fungal-type vacuole membrane [GO:0000329]; integral component of membrane [GO:0016021]; gamma-aminobutyric acid:proton symporter activity [GO:0015495]; putrescine transmembrane transporter activity [GO:0015489]; gamma-aminobutyric acid transport [GO:0015812]; putrescine transport [GO:0015847]; transmembrane transport [GO:0055085]	gamma-aminobutyric acid transport [GO:0015812]; putrescine transport [GO:0015847]; transmembrane transport [GO:0055085]	gamma-aminobutyric acid:proton symporter activity [GO:0015495]; putrescine transmembrane transporter activity [GO:0015489]	fungal-type vacuole membrane [GO:0000329]; integral component of membrane [GO:0016021]	GO:0000329; GO:0015812; GO:0015495; GO:0016021; GO:0015489; GO:0015847; GO:0055085							FUNCTION: Required for high-affinity, high-specificity GABA transport. Also transports putrescine. {ECO:0000269|PubMed:14985124}.		4 out of 5		31836;	DIP-1857N;	P32837;	MINT-409806;
g1915.t1	GK5S-3091	-	1990:72-1957	GLC	XYL	OK	68.5727	45.8376	-0.581104	-1.05459	0.17065	0.448863	no	g1915.t1	P47082	AVT1_YEAST	reviewed	Vacuolar amino acid transporter 1	AVT1 YJR001W J1409 YJR83.4	Saccharomyces cerevisiae (strain ATCC 204508 / S288c) (Baker's yeast)	602	AVT1		YJR001W	J1409 YJR83.4		SUBCELLULAR LOCATION: Vacuole membrane {ECO:0000269|PubMed:11274162}; Multi-pass membrane protein {ECO:0000269|PubMed:11274162}.		TOPO_DOM 1 208 Cytoplasmic. {ECO:0000255}.; TOPO_DOM 232 240 Vacuolar. {ECO:0000255}.; TOPO_DOM 262 286 Cytoplasmic. {ECO:0000255}.; TOPO_DOM 308 321 Vacuolar. {ECO:0000255}.; TOPO_DOM 343 344 Cytoplasmic. {ECO:0000255}.; TOPO_DOM 366 389 Vacuolar. {ECO:0000255}.; TOPO_DOM 411 429 Cytoplasmic. {ECO:0000255}.; TOPO_DOM 451 466 Vacuolar. {ECO:0000255}.; TOPO_DOM 488 517 Cytoplasmic. {ECO:0000255}.;…	TRANSMEM 209 231 Helical. {ECO:0000255}.; TRANSMEM 241 261 Helical. {ECO:0000255}.; TRANSMEM 287 307 Helical. {ECO:0000255}.; TRANSMEM 322 342 Helical. {ECO:0000255}.; TRANSMEM 345 365 Helical. {ECO:0000255}.; TRANSMEM 390 410 Helical. {ECO:0000255}.; TRANSMEM 430 450 Helical. {ECO:0000255}.; TRANSMEM 467 487 Helical. {ECO:0000255}.; TRANSMEM 518 538 Helical. {ECO:0000255}.; TRANSMEM 544 564 Heli…	fungal-type vacuole [GO:0000324]; fungal-type vacuole membrane [GO:0000329]; integral component of membrane [GO:0016021]; L-glutamine transmembrane transporter activity [GO:0015186]; L-isoleucine transmembrane transporter activity [GO:0015188]; L-tyrosine transmembrane transporter activity [GO:0005302]; amino acid transmembrane transport [GO:0003333]; amino acid transport [GO:0006865]; branched-c…	amino acid transmembrane transport [GO:0003333]; amino acid transport [GO:0006865]; branched-chain amino acid transport [GO:0015803]; cation transmembrane transport [GO:0098655]; cation transport [GO:0006812]; glutamine transport [GO:0006868]; L-alpha-amino acid transmembrane transport [GO:1902475]; L-amino acid transport [GO:0015807]; neutral amino acid transport [GO:0015804]; tyrosine transport…	L-glutamine transmembrane transporter activity [GO:0015186]; L-isoleucine transmembrane transporter activity [GO:0015188]; L-tyrosine transmembrane transporter activity [GO:0005302]	fungal-type vacuole [GO:0000324]; fungal-type vacuole membrane [GO:0000329]; integral component of membrane [GO:0016021]	GO:1902475; GO:0015807; GO:0015186; GO:0015188; GO:0005302; GO:0003333; GO:0006865; GO:0015803; GO:0098655; GO:0006812; GO:0000324; GO:0000329; GO:0006868; GO:0016021; GO:0015804; GO:0015828; GO:0007034							FUNCTION: Required for the vacuolar uptake of large neutral amino acids including tyrosine, glutamine, asparagine, isoleucine and leucine. Requires ATP for function. {ECO:0000269|PubMed:11274162}.		5 out of 5		33757;	DIP-5709N;	P47082;	MINT-504618;
g3584.t1	GK5S-1396	-	3390:20921-23106	GLC	XYL	OK	46.7582	30.3223	-0.624842	-1.08897	0.14965	0.417314	no	g3584.t1	Q6CXP4	LST4_KLULA	reviewed	Protein LST4	LST4 KLLA0A06622g	Kluyveromyces lactis (strain ATCC 8585 / CBS 2359 / DSM 70799 / NBRC 1267 / NRRL Y-1140 / WM37) (Yeast) (Candida sphaerica)	714	LST4		KLLA0A06622g							amino acid transport [GO:0006865]; protein transport [GO:0015031]	amino acid transport [GO:0006865]; protein transport [GO:0015031]			GO:0006865; GO:0015031							FUNCTION: Involved in extracellular amino acid uptake. Required for the protein trafficking from the Golgi to the plasma membrane (By similarity). {ECO:0000250}.		2 out of 5
g1760.t1	GK5S-3254	-	1801:12425-15189	GLC	XYL	OK	37.0356	22.2937	-0.732279	-1.2651	0.08925	0.309943	no	g1760.t1	Q12482	AGC1_YEAST	reviewed	Mitochondrial aspartate-glutamate transporter AGC1 (Aspartate-glutamate carrier 1)	AGC1 YPR021C YP9367.01C	Saccharomyces cerevisiae (strain ATCC 204508 / S288c) (Baker's yeast)	902	AGC1		YPR021C	YP9367.01C		SUBCELLULAR LOCATION: Mitochondrion inner membrane {ECO:0000269|PubMed:14576278, ECO:0000269|PubMed:14622413}; Multi-pass membrane protein {ECO:0000269|PubMed:14576278, ECO:0000269|PubMed:14622413}.			TRANSMEM 534 554 Helical; Name=1. {ECO:0000255}.; TRANSMEM 591 611 Helical; Name=2. {ECO:0000255}.; TRANSMEM 622 642 Helical; Name=3. {ECO:0000255}.; TRANSMEM 681 702 Helical; Name=4. {ECO:0000255}.; TRANSMEM 731 751 Helical; Name=5. {ECO:0000255}.; TRANSMEM 786 806 Helical; Name=6. {ECO:0000255}.	integral component of membrane [GO:0016021]; mitochondrial inner membrane [GO:0005743]; antiporter activity [GO:0015297]; L-aspartate transmembrane transporter activity [GO:0015183]; L-glutamate transmembrane transporter activity [GO:0005313]; uniporter activity [GO:0015292]; aspartate transport [GO:0015810]; cellular nitrogen compound biosynthetic process [GO:0044271]; L-aspartate transmembrane …	aspartate transport [GO:0015810]; cellular nitrogen compound biosynthetic process [GO:0044271]; L-aspartate transmembrane transport [GO:0089712]; L-glutamate transmembrane transport [GO:0089711]; L-glutamate transport [GO:0015813]	antiporter activity [GO:0015297]; L-aspartate transmembrane transporter activity [GO:0015183]; L-glutamate transmembrane transporter activity [GO:0005313]; uniporter activity [GO:0015292]	integral component of membrane [GO:0016021]; mitochondrial inner membrane [GO:0005743]	GO:0089712; GO:0015183; GO:0089711; GO:0005313; GO:0015813; GO:0015297; GO:0015810; GO:0044271; GO:0016021; GO:0005743; GO:0015292							FUNCTION: Calcium-dependent mitochondrial aspartate and glutamate carrier. Transport of glutamate in mitochondria is required for mitochondrial transamination reactions and ornithine synthesis. Plays also a role in malate-aspartate NADH shuttle, which is critical for growth on acetate and fatty acids. {ECO:0000269|PubMed:14622413, ECO:0000269|PubMed:9178508}.		5 out of 5		36198;	DIP-8968N;
g4793.t1	GK5S-167	-	4918:4012-4456	GLC	XYL	OK	92.016	52.3168	-0.814608	-1.66189	0.1393	0.399605	no	g4793.t1	P32837	UGA4_YEAST	reviewed	GABA-specific permease (GABA-specific transport protein)	UGA4 YDL210W D1037	Saccharomyces cerevisiae (strain ATCC 204508 / S288c) (Baker's yeast)	571	UGA4		YDL210W	D1037		SUBCELLULAR LOCATION: Vacuole membrane {ECO:0000269|PubMed:14985124}; Multi-pass membrane protein {ECO:0000269|PubMed:14985124}.		TOPO_DOM 1 73 Cytoplasmic. {ECO:0000255}.; TOPO_DOM 95 105 Vacuolar. {ECO:0000255}.; TOPO_DOM 127 153 Cytoplasmic. {ECO:0000255}.; TOPO_DOM 175 198 Vacuolar. {ECO:0000255}.; TOPO_DOM 220 228 Cytoplasmic. {ECO:0000255}.; TOPO_DOM 250 271 Vacuolar. {ECO:0000255}.; TOPO_DOM 293 312 Cytoplasmic. {ECO:0000255}.; TOPO_DOM 334 364 Vacuolar. {ECO:0000255}.; TOPO_DOM 386 416 Cytoplasmic. {ECO:0000255}.; T…	TRANSMEM 74 94 Helical. {ECO:0000255}.; TRANSMEM 106 126 Helical. {ECO:0000255}.; TRANSMEM 154 174 Helical. {ECO:0000255}.; TRANSMEM 199 219 Helical. {ECO:0000255}.; TRANSMEM 229 249 Helical. {ECO:0000255}.; TRANSMEM 272 292 Helical. {ECO:0000255}.; TRANSMEM 313 333 Helical. {ECO:0000255}.; TRANSMEM 365 385 Helical. {ECO:0000255}.; TRANSMEM 417 437 Helical. {ECO:0000255}.; TRANSMEM 442 462 Helica…	fungal-type vacuole membrane [GO:0000329]; integral component of membrane [GO:0016021]; gamma-aminobutyric acid:proton symporter activity [GO:0015495]; putrescine transmembrane transporter activity [GO:0015489]; gamma-aminobutyric acid transport [GO:0015812]; putrescine transport [GO:0015847]; transmembrane transport [GO:0055085]	gamma-aminobutyric acid transport [GO:0015812]; putrescine transport [GO:0015847]; transmembrane transport [GO:0055085]	gamma-aminobutyric acid:proton symporter activity [GO:0015495]; putrescine transmembrane transporter activity [GO:0015489]	fungal-type vacuole membrane [GO:0000329]; integral component of membrane [GO:0016021]	GO:0000329; GO:0015812; GO:0015495; GO:0016021; GO:0015489; GO:0015847; GO:0055085							FUNCTION: Required for high-affinity, high-specificity GABA transport. Also transports putrescine. {ECO:0000269|PubMed:14985124}.		4 out of 5		31836;	DIP-1857N;	P32837;	MINT-409806;
g2070.t1	GK5S-2935	-	2110:963-1816	GLC	XYL	OK	64.0866	27.459	-1.22274	-2.08356	0.0199	0.115656	no	g2070.t1	Q12375	ORT1_YEAST	reviewed	Mitochondrial ornithine transporter 1	ORT1 ARG11 YOR130C O3299 YOR3299C	Saccharomyces cerevisiae (strain ATCC 204508 / S288c) (Baker's yeast)	292	ORT1	ARG11	YOR130C	O3299 YOR3299C		SUBCELLULAR LOCATION: Mitochondrion inner membrane {ECO:0000269|PubMed:14562095}; Multi-pass membrane protein {ECO:0000269|PubMed:14562095}.			TRANSMEM 14 34 Helical; Name=1. {ECO:0000255}.; TRANSMEM 69 89 Helical; Name=2. {ECO:0000255}.; TRANSMEM 104 124 Helical; Name=3. {ECO:0000255}.; TRANSMEM 171 187 Helical; Name=4. {ECO:0000255}.; TRANSMEM 213 233 Helical; Name=5. {ECO:0000255}.; TRANSMEM 267 287 Helical; Name=6. {ECO:0000255}.	integral component of membrane [GO:0016021]; mitochondrial envelope [GO:0005740]; mitochondrial inner membrane [GO:0005743]; L-ornithine transmembrane transporter activity [GO:0000064]; arginine biosynthetic process [GO:0006526]; L-ornithine transmembrane transport [GO:1903352]; mitochondrial ornithine transport [GO:0000066]	arginine biosynthetic process [GO:0006526]; L-ornithine transmembrane transport [GO:1903352]; mitochondrial ornithine transport [GO:0000066]	L-ornithine transmembrane transporter activity [GO:0000064]	integral component of membrane [GO:0016021]; mitochondrial envelope [GO:0005740]; mitochondrial inner membrane [GO:0005743]	GO:1903352; GO:0000064; GO:0006526; GO:0016021; GO:0005740; GO:0005743; GO:0000066							FUNCTION: Required for arginine biosynthesis. Transports ornithine synthesized from glutamate in the mitochondrial matrix to the cytosol, where it is converted to arginine. {ECO:0000269|PubMed:9237680}.		4 out of 5		34525;	DIP-8953N;		MINT-2493498;
g2778.t1	GK5S-2231	-	2636:52040-53736	GLC	XYL	OK	59.8226	25.5982	-1.22465	-2.04863	0.0101	0.0713227	no	g2778.t1	P38358	VBA2_YEAST	reviewed	Vacuolar basic amino acid transporter 2	VBA2 YBR293W YBR2109	Saccharomyces cerevisiae (strain ATCC 204508 / S288c) (Baker's yeast)	474	VBA2		YBR293W	YBR2109		SUBCELLULAR LOCATION: Vacuole membrane {ECO:0000250}; Multi-pass membrane protein {ECO:0000250}.		TOPO_DOM 1 33 Cytoplasmic. {ECO:0000255}.; TOPO_DOM 55 62 Vacuolar. {ECO:0000255}.; TOPO_DOM 86 97 Cytoplasmic. {ECO:0000255}.; TOPO_DOM 119 121 Vacuolar. {ECO:0000255}.; TOPO_DOM 143 167 Cytoplasmic. {ECO:0000255}.; TOPO_DOM 189 196 Vacuolar. {ECO:0000255}.; TOPO_DOM 218 238 Cytoplasmic. {ECO:0000255}.; TOPO_DOM 260 273 Vacuolar. {ECO:0000255}.; TOPO_DOM 295 303 Cytoplasmic. {ECO:0000255}.; TOPO…	TRANSMEM 34 54 Helical. {ECO:0000255}.; TRANSMEM 63 85 Helical. {ECO:0000255}.; TRANSMEM 98 118 Helical. {ECO:0000255}.; TRANSMEM 122 142 Helical. {ECO:0000255}.; TRANSMEM 168 188 Helical. {ECO:0000255}.; TRANSMEM 197 217 Helical. {ECO:0000255}.; TRANSMEM 239 259 Helical. {ECO:0000255}.; TRANSMEM 274 294 Helical. {ECO:0000255}.; TRANSMEM 304 324 Helical. {ECO:0000255}.; TRANSMEM 332 352 Helical. …	fungal-type vacuole membrane [GO:0000329]; integral component of membrane [GO:0016021]; basic amino acid transmembrane transporter activity [GO:0015174]; basic amino acid transport [GO:0015802]; transmembrane transport [GO:0055085]	basic amino acid transport [GO:0015802]; transmembrane transport [GO:0055085]	basic amino acid transmembrane transporter activity [GO:0015174]	fungal-type vacuole membrane [GO:0000329]; integral component of membrane [GO:0016021]	GO:0015174; GO:0015802; GO:0000329; GO:0016021; GO:0055085							FUNCTION: Transporter required for vacuolar uptake of histidine, arginine and lysine and to a lesser extent tyrosine. {ECO:0000269|PubMed:15572352}.		3 out of 5		32986;	DIP-5142N;	P38358;	MINT-503565;
g3982.t1	GK5S-981	-	3899:7557-8380	GLC	XYL	OK	68.0599	27.0537	-1.33098	-2.35242	0.0104	0.0730021	no	g3982.t1	P38921	PET8_YEAST	reviewed	Putative mitochondrial carrier protein PET8	PET8 YNL003C N2012	Saccharomyces cerevisiae (strain ATCC 204508 / S288c) (Baker's yeast)	284	PET8		YNL003C	N2012		SUBCELLULAR LOCATION: Mitochondrion inner membrane {ECO:0000305}; Multi-pass membrane protein {ECO:0000305}.			TRANSMEM 5 25 Helical; Name=1. {ECO:0000255}.; TRANSMEM 50 70 Helical; Name=2. {ECO:0000255}.; TRANSMEM 98 118 Helical; Name=3. {ECO:0000255}.; TRANSMEM 153 169 Helical; Name=4. {ECO:0000255}.; TRANSMEM 194 214 Helical; Name=5. {ECO:0000255}.; TRANSMEM 252 272 Helical; Name=6. {ECO:0000255}.	integral component of membrane [GO:0016021]; mitochondrial inner membrane [GO:0005743]; mitochondrion [GO:0005739]; S-adenosyl-L-methionine transmembrane transporter activity [GO:0000095]; S-adenosyl-L-methionine transmembrane transport [GO:1901962]; S-adenosyl-L-methionine transport [GO:0015805]	S-adenosyl-L-methionine transmembrane transport [GO:1901962]; S-adenosyl-L-methionine transport [GO:0015805]	S-adenosyl-L-methionine transmembrane transporter activity [GO:0000095]	integral component of membrane [GO:0016021]; mitochondrial inner membrane [GO:0005743]; mitochondrion [GO:0005739]	GO:1901962; GO:0000095; GO:0015805; GO:0016021; GO:0005743; GO:0005739									3 out of 5		35822;	DIP-2944N;	P38921;	MINT-1585704;
g862.t1	GK5S-4170	-	931:23631-25327	GLC	XYL	OK	85.8487	33.9679	-1.33763	-2.39063	0.0034	0.0330567	yes	g862.t1	Q04301	VBA1_YEAST	reviewed	Vacuolar basic amino acid transporter 1	VBA1 YMR088C YM9582.13C	Saccharomyces cerevisiae (strain ATCC 204508 / S288c) (Baker's yeast)	562	VBA1		YMR088C	YM9582.13C		SUBCELLULAR LOCATION: Vacuole membrane {ECO:0000269|PubMed:15572352}; Multi-pass membrane protein {ECO:0000269|PubMed:15572352}.		TOPO_DOM 1 30 Vacuolar. {ECO:0000255}.; TOPO_DOM 52 100 Cytoplasmic. {ECO:0000255}.; TOPO_DOM 122 131 Vacuolar. {ECO:0000255}.; TOPO_DOM 153 166 Cytoplasmic. {ECO:0000255}.; TOPO_DOM 188 190 Vacuolar. {ECO:0000255}.; TOPO_DOM 212 232 Cytoplasmic. {ECO:0000255}.; TOPO_DOM 254 255 Vacuolar. {ECO:0000255}.; TOPO_DOM 277 292 Cytoplasmic. {ECO:0000255}.; TOPO_DOM 314 331 Vacuolar. {ECO:0000255}.; TOPO…	TRANSMEM 31 51 Helical. {ECO:0000255}.; TRANSMEM 101 121 Helical. {ECO:0000255}.; TRANSMEM 132 152 Helical. {ECO:0000255}.; TRANSMEM 167 187 Helical. {ECO:0000255}.; TRANSMEM 191 211 Helical. {ECO:0000255}.; TRANSMEM 233 253 Helical. {ECO:0000255}.; TRANSMEM 256 276 Helical. {ECO:0000255}.; TRANSMEM 293 313 Helical. {ECO:0000255}.; TRANSMEM 332 352 Helical. {ECO:0000255}.; TRANSMEM 366 386 Helica…	fungal-type vacuole membrane [GO:0000329]; integral component of membrane [GO:0016021]; basic amino acid transmembrane transporter activity [GO:0015174]; basic amino acid transport [GO:0015802]	basic amino acid transport [GO:0015802]	basic amino acid transmembrane transporter activity [GO:0015174]	fungal-type vacuole membrane [GO:0000329]; integral component of membrane [GO:0016021]	GO:0015174; GO:0015802; GO:0000329; GO:0016021							FUNCTION: Transporter required for vacuolar uptake of at least histidine and lysine. {ECO:0000269|PubMed:15572352}.		3 out of 5		35263;	DIP-888N;
g2152.t1	GK5S-2853	-	2154:9529-11270	GLC	XYL	OK	107.255	40.3635	-1.40992	-2.36861	0.0022	0.0231123	yes	g2152.t1	P04817	CAN1_YEAST	reviewed	Arginine permease	CAN1 YEL063C	Saccharomyces cerevisiae (strain ATCC 204508 / S288c) (Baker's yeast)	590	CAN1		YEL063C			SUBCELLULAR LOCATION: Cell membrane {ECO:0000269|PubMed:21880895}; Multi-pass membrane protein {ECO:0000269|PubMed:21880895}. Endosome membrane {ECO:0000269|PubMed:21880895}; Multi-pass membrane protein {ECO:0000269|PubMed:21880895}. Note=Recycled via the retromer-mediated pathway.			TRANSMEM 93 110 Helical. {ECO:0000255}.; TRANSMEM 230 254 Helical. {ECO:0000255}.; TRANSMEM 324 343 Helical. {ECO:0000255}.; TRANSMEM 377 396 Helical. {ECO:0000255}.; TRANSMEM 420 437 Helical. {ECO:0000255}.; TRANSMEM 451 469 Helical. {ECO:0000255}.; TRANSMEM 494 518 Helical. {ECO:0000255}.; TRANSMEM 525 548 Helical. {ECO:0000255}.	endosome membrane [GO:0010008]; integral component of membrane [GO:0016021]; membrane raft [GO:0045121]; plasma membrane [GO:0005886]; arginine transmembrane transporter activity [GO:0015181]; basic amino acid transmembrane transporter activity [GO:0015174]; arginine transmembrane transport [GO:1903826]; arginine transport [GO:0015809]; basic amino acid transport [GO:0015802]; transmembrane trans…	arginine transmembrane transport [GO:1903826]; arginine transport [GO:0015809]; basic amino acid transport [GO:0015802]; transmembrane transport [GO:0055085]	arginine transmembrane transporter activity [GO:0015181]; basic amino acid transmembrane transporter activity [GO:0015174]	endosome membrane [GO:0010008]; integral component of membrane [GO:0016021]; membrane raft [GO:0045121]; plasma membrane [GO:0005886]	GO:1903826; GO:0015181; GO:0015809; GO:0015174; GO:0015802; GO:0010008; GO:0016021; GO:0045121; GO:0005886; GO:0055085							FUNCTION: High-affinity permease for arginine. {ECO:0000269|PubMed:10654085}.		5 out of 5		36666;	DIP-4062N;	P04817;	MINT-476477;
g3535.t1	GK5S-1442	-	3328:6535-8309	GLC	XYL	OK	9.5985	3.54155	-1.43843	-1.74763	0.0347	0.171889	no	g3535.t1	P38967	TAT2_YEAST	reviewed	Tryptophan permease (Tryptophan amino acid transporter)	TAT2 LTG3 SAB2 SCM2 TAP2 YOL020W	Saccharomyces cerevisiae (strain ATCC 204508 / S288c) (Baker's yeast)	592	TAT2	LTG3 SAB2 SCM2 TAP2	YOL020W			SUBCELLULAR LOCATION: Membrane; Multi-pass membrane protein.		TOPO_DOM 1 87 Cytoplasmic. {ECO:0000255}.; TOPO_DOM 109 113 Extracellular. {ECO:0000255}.; TOPO_DOM 135 160 Cytoplasmic. {ECO:0000255}.; TOPO_DOM 182 192 Extracellular. {ECO:0000255}.; TOPO_DOM 214 226 Cytoplasmic. {ECO:0000255}.; TOPO_DOM 248 266 Extracellular. {ECO:0000255}.; TOPO_DOM 288 306 Cytoplasmic. {ECO:0000255}.; TOPO_DOM 328 358 Extracellular. {ECO:0000255}.; TOPO_DOM 380 404 Cytoplasm…	TRANSMEM 88 108 Helical. {ECO:0000255}.; TRANSMEM 114 134 Helical. {ECO:0000255}.; TRANSMEM 161 181 Helical. {ECO:0000255}.; TRANSMEM 193 213 Helical. {ECO:0000255}.; TRANSMEM 227 247 Helical. {ECO:0000255}.; TRANSMEM 267 287 Helical. {ECO:0000255}.; TRANSMEM 307 327 Helical. {ECO:0000255}.; TRANSMEM 359 379 Helical. {ECO:0000255}.; TRANSMEM 405 425 Helical. {ECO:0000255}.; TRANSMEM 429 449 Helic…	integral component of membrane [GO:0016021]; plasma membrane [GO:0005886]; aromatic amino acid transmembrane transporter activity [GO:0015173]; catalytic activity [GO:0003824]; high-affinity tryptophan transmembrane transporter activity [GO:0005300]; aromatic amino acid transport [GO:0015801]; tryptophan transport [GO:0015827]	aromatic amino acid transport [GO:0015801]; tryptophan transport [GO:0015827]	aromatic amino acid transmembrane transporter activity [GO:0015173]; catalytic activity [GO:0003824]; high-affinity tryptophan transmembrane transporter activity [GO:0005300]	integral component of membrane [GO:0016021]; plasma membrane [GO:0005886]	GO:0015173; GO:0015801; GO:0003824; GO:0005300; GO:0016021; GO:0005886; GO:0015827							FUNCTION: Required for high-affinity tryptophan transport. Also transports cysteine, phenyalanine and tyrosine. {ECO:0000269|PubMed:10467005, ECO:0000269|PubMed:10654085}.		4 out of 5		34382;	DIP-1782N;	P38967;	MINT-408126;
g4101.t1	GK5S-873	-	4065:9705-11416	GLC	XYL	OK	14.3962	4.60808	-1.64345	-2.11755	0.0115	0.078723	no	g4101.t1	Q09752	FNX1_SCHPO	reviewed	Multidrug resistance protein fnx1	fnx1 SPBC12C2.13c SPBC21D10.04c	Schizosaccharomyces pombe (strain 972 / ATCC 24843) (Fission yeast)	531	fnx1			SPBC12C2.13c SPBC21D10.04c		SUBCELLULAR LOCATION: Vacuole membrane {ECO:0000269|PubMed:10759889, ECO:0000269|PubMed:16823372}; Multi-pass membrane protein {ECO:0000269|PubMed:10759889, ECO:0000269|PubMed:16823372}.		TOPO_DOM 1 30 Cytoplasmic. {ECO:0000255}.; TOPO_DOM 52 225 Lumenal. {ECO:0000255}.; TOPO_DOM 247 252 Cytoplasmic. {ECO:0000255}.; TOPO_DOM 274 297 Lumenal. {ECO:0000255}.; TOPO_DOM 319 360 Cytoplasmic. {ECO:0000255}.; TOPO_DOM 382 385 Lumenal. {ECO:0000255}.; TOPO_DOM 407 496 Cytoplasmic. {ECO:0000255}.; TOPO_DOM 518 531 Lumenal. {ECO:0000255}.	TRANSMEM 31 51 Helical. {ECO:0000255}.; TRANSMEM 226 246 Helical. {ECO:0000255}.; TRANSMEM 253 273 Helical. {ECO:0000255}.; TRANSMEM 298 318 Helical. {ECO:0000255}.; TRANSMEM 361 381 Helical. {ECO:0000255}.; TRANSMEM 386 406 Helical. {ECO:0000255}.; TRANSMEM 497 517 Helical. {ECO:0000255}.	fungal-type vacuole [GO:0000324]; fungal-type vacuole membrane [GO:0000329]; integral component of vacuolar membrane [GO:0031166]; L-asparagine transmembrane transporter activity [GO:0015182]; L-isoleucine transmembrane transporter activity [GO:0015188]; L-lysine transmembrane transporter activity [GO:0015189]; asparagine transmembrane import into vacuole [GO:1990591]; G1 to G0 transition [GO:007…	asparagine transmembrane import into vacuole [GO:1990591]; G1 to G0 transition [GO:0070314]; isoleucine transmembrane transport [GO:1903714]; L-alpha-amino acid transmembrane transport [GO:1902475]; L-lysine import involved in cellular response to nitrogen starvation [GO:1901482]; L-lysine transmembrane transport [GO:1903401]	L-asparagine transmembrane transporter activity [GO:0015182]; L-isoleucine transmembrane transporter activity [GO:0015188]; L-lysine transmembrane transporter activity [GO:0015189]	fungal-type vacuole [GO:0000324]; fungal-type vacuole membrane [GO:0000329]; integral component of vacuolar membrane [GO:0031166]	GO:0070314; GO:1902475; GO:0015182; GO:0015188; GO:1901482; GO:1903401; GO:0015189; GO:1990591; GO:0000324; GO:0000329; GO:0031166; GO:1903714							FUNCTION: Efflux transporter. Confers resistance to a variety of toxic compounds. {ECO:0000269|PubMed:9710608}.		5 out of 5		276336;			MINT-4694705;
g1501.t1	GK5S-3513	-	1577:3948-5590	GLC	XYL	OK	71.3055	22.03	-1.69454	-2.93944	0.00035	0.00518486	yes	g1501.t1	Q12235	YCT1_YEAST	reviewed	High affinity cysteine transporter	YCT1 YLL055W L0578	Saccharomyces cerevisiae (strain ATCC 204508 / S288c) (Baker's yeast)	531	YCT1		YLL055W	L0578		SUBCELLULAR LOCATION: Cell membrane; Multi-pass membrane protein. Endoplasmic reticulum membrane; Multi-pass membrane protein.		TOPO_DOM 1 54 Cytoplasmic. {ECO:0000255}.; TOPO_DOM 76 97 Lumenal. {ECO:0000255}.; TOPO_DOM 119 120 Cytoplasmic. {ECO:0000255}.; TOPO_DOM 142 154 Lumenal. {ECO:0000255}.; TOPO_DOM 176 186 Cytoplasmic. {ECO:0000255}.; TOPO_DOM 208 218 Lumenal. {ECO:0000255}.; TOPO_DOM 240 285 Cytoplasmic. {ECO:0000255}.; TOPO_DOM 307 324 Lumenal. {ECO:0000255}.; TOPO_DOM 346 352 Cytoplasmic. {ECO:0000255}.; TOPO_D…	TRANSMEM 55 75 Helical. {ECO:0000255}.; TRANSMEM 98 118 Helical. {ECO:0000255}.; TRANSMEM 121 141 Helical. {ECO:0000255}.; TRANSMEM 155 175 Helical. {ECO:0000255}.; TRANSMEM 187 207 Helical. {ECO:0000255}.; TRANSMEM 219 239 Helical. {ECO:0000255}.; TRANSMEM 286 306 Helical. {ECO:0000255}.; TRANSMEM 325 345 Helical. {ECO:0000255}.; TRANSMEM 353 373 Helical. {ECO:0000255}.; TRANSMEM 379 399 Helical…	endoplasmic reticulum membrane [GO:0005789]; integral component of membrane [GO:0016021]; plasma membrane [GO:0005886]; cysteine transmembrane transporter activity [GO:0033229]; ion transmembrane transporter activity [GO:0015075]; cysteine transmembrane transport [GO:1903712]; cysteine transport [GO:0042883]; ion transmembrane transport [GO:0034220]	cysteine transmembrane transport [GO:1903712]; cysteine transport [GO:0042883]; ion transmembrane transport [GO:0034220]	cysteine transmembrane transporter activity [GO:0033229]; ion transmembrane transporter activity [GO:0015075]	endoplasmic reticulum membrane [GO:0005789]; integral component of membrane [GO:0016021]; plasma membrane [GO:0005886]	GO:1903712; GO:0033229; GO:0042883; GO:0005789; GO:0016021; GO:0034220; GO:0015075; GO:0005886							FUNCTION: High affinity cysteine-specific transporter. Major contributor to cysteine transport when cysteine, at low concentrations, is provided as the sole sulfur source. {ECO:0000269|PubMed:17435223}.		5 out of 5		31260;			MINT-2494190;
g1083.t1	GK5S-3951	-	1174:26922-28462	GLC	XYL	OK	78.3766	19.6944	-1.99264	-3.29991	0.0001	0.00179923	yes	g1083.t1	P50276	MUP1_YEAST	reviewed	High-affinity methionine permease	MUP1 YGR055W	Saccharomyces cerevisiae (strain ATCC 204508 / S288c) (Baker's yeast)	574	MUP1		YGR055W			SUBCELLULAR LOCATION: Membrane {ECO:0000305}; Multi-pass membrane protein {ECO:0000305}.		TOPO_DOM 1 61 Cytoplasmic. {ECO:0000255}.; TOPO_DOM 83 92 Extracellular. {ECO:0000255}.; TOPO_DOM 114 140 Cytoplasmic. {ECO:0000255}.; TOPO_DOM 162 182 Extracellular. {ECO:0000255}.; TOPO_DOM 204 207 Cytoplasmic. {ECO:0000255}.; TOPO_DOM 229 293 Extracellular. {ECO:0000255}.; TOPO_DOM 315 340 Cytoplasmic. {ECO:0000255}.; TOPO_DOM 362 418 Extracellular. {ECO:0000255}.; TOPO_DOM 440 455 Cytoplasmic…	TRANSMEM 62 82 Helical. {ECO:0000255}.; TRANSMEM 93 113 Helical. {ECO:0000255}.; TRANSMEM 141 161 Helical. {ECO:0000255}.; TRANSMEM 183 203 Helical. {ECO:0000255}.; TRANSMEM 208 228 Helical. {ECO:0000255}.; TRANSMEM 294 314 Helical. {ECO:0000255}.; TRANSMEM 341 361 Helical. {ECO:0000255}.; TRANSMEM 419 439 Helical. {ECO:0000255}.; TRANSMEM 456 476 Helical. {ECO:0000255}.; TRANSMEM 491 511 Helical…	integral component of plasma membrane [GO:0005887]; L-methionine secondary active transmembrane transporter activity [GO:0000102]; cysteine transport [GO:0042883]; L-alpha-amino acid transmembrane transport [GO:1902475]; L-amino acid transport [GO:0015807]; methionine import [GO:0044690]; methionine transport [GO:0015821]; sulfur amino acid transport [GO:0000101]	cysteine transport [GO:0042883]; L-alpha-amino acid transmembrane transport [GO:1902475]; L-amino acid transport [GO:0015807]; methionine import [GO:0044690]; methionine transport [GO:0015821]; sulfur amino acid transport [GO:0000101]	L-methionine secondary active transmembrane transporter activity [GO:0000102]	integral component of plasma membrane [GO:0005887]	GO:1902475; GO:0015807; GO:0000102; GO:0042883; GO:0005887; GO:0044690; GO:0015821; GO:0000101							FUNCTION: High affinity permease for methionine.		4 out of 5		33300;	DIP-7914N;	P50276;	MINT-1357522;
g3784.t1	GK5S-1189	-	3604:2998-4757	GLC	XYL	OK	42.5965	10.1292	-2.07222	-3.26435	0.0002	0.00326111	yes	g3784.t1	O59726	FNX2_SCHPO	reviewed	Vacuolar membrane amino acid uptake transporter fnx2	fnx2 SPBC3E7.06c	Schizosaccharomyces pombe (strain 972 / ATCC 24843) (Fission yeast)	577	fnx2			SPBC3E7.06c		SUBCELLULAR LOCATION: Vacuole {ECO:0000269|PubMed:10759889, ECO:0000269|PubMed:16823372}. Membrane {ECO:0000269|PubMed:10759889, ECO:0000269|PubMed:16823372}; Multi-pass membrane protein {ECO:0000269|PubMed:10759889, ECO:0000269|PubMed:16823372}.			TRANSMEM 91 111 Helical. {ECO:0000255}.; TRANSMEM 123 145 Helical. {ECO:0000255}.; TRANSMEM 157 177 Helical. {ECO:0000255}.; TRANSMEM 186 206 Helical. {ECO:0000255}.; TRANSMEM 217 237 Helical. {ECO:0000255}.; TRANSMEM 244 264 Helical. {ECO:0000255}.; TRANSMEM 286 306 Helical. {ECO:0000255}.; TRANSMEM 317 337 Helical. {ECO:0000255}.; TRANSMEM 356 376 Helical. {ECO:0000255}.; TRANSMEM 391 411 Helic…	cytoplasm [GO:0005737]; fungal-type vacuole [GO:0000324]; fungal-type vacuole membrane [GO:0000329]; integral component of vacuolar membrane [GO:0031166]; L-asparagine transmembrane transporter activity [GO:0015182]; L-isoleucine transmembrane transporter activity [GO:0015188]; L-lysine transmembrane transporter activity [GO:0015189]; asparagine transmembrane import into vacuole [GO:1990591]; iso…	asparagine transmembrane import into vacuole [GO:1990591]; isoleucine transmembrane transport [GO:1903714]; L-alpha-amino acid transmembrane transport [GO:1902475]; L-amino acid transport [GO:0015807]; L-lysine transmembrane transport [GO:1903401]; lysine transmembrane import into vacuole [GO:0090456]	L-asparagine transmembrane transporter activity [GO:0015182]; L-isoleucine transmembrane transporter activity [GO:0015188]; L-lysine transmembrane transporter activity [GO:0015189]	cytoplasm [GO:0005737]; fungal-type vacuole [GO:0000324]; fungal-type vacuole membrane [GO:0000329]; integral component of vacuolar membrane [GO:0031166]	GO:1902475; GO:0015807; GO:0015182; GO:0015188; GO:1903401; GO:0015189; GO:1990591; GO:0005737; GO:0000324; GO:0000329; GO:0031166; GO:1903714; GO:0090456							FUNCTION: MFS-type transporter involved in vacuolar amino acid uptake. {ECO:0000269|PubMed:18503766}.		5 out of 5					MINT-4675707;
g3878.t1	GK5S-1102	-	3772:13797-14716	GLC	XYL	OK	388.593	84.5754	-2.19995	-4.43001	5e-05	0.00100773	yes	g3878.t1	Q12010	YPQ1_YEAST	reviewed	Probable vacuolar amino acid transporter YPQ1 (PQ-loop repeat-containing protein 1)	YPQ1 YOL092W O0929	Saccharomyces cerevisiae (strain ATCC 204508 / S288c) (Baker's yeast)	308	YPQ1		YOL092W	O0929		SUBCELLULAR LOCATION: Vacuole membrane {ECO:0000269|PubMed:14562095, ECO:0000269|PubMed:23169667}; Multi-pass membrane protein {ECO:0000269|PubMed:14562095, ECO:0000269|PubMed:23169667}.		TOPO_DOM 1 12 Vacuolar. {ECO:0000255}.; TOPO_DOM 34 44 Cytoplasmic. {ECO:0000255}.; TOPO_DOM 66 68 Vacuolar. {ECO:0000255}.; TOPO_DOM 90 167 Cytoplasmic. {ECO:0000255}.; TOPO_DOM 189 205 Vacuolar. {ECO:0000255}.; TOPO_DOM 227 244 Cytoplasmic. {ECO:0000255}.; TOPO_DOM 266 277 Vacuolar. {ECO:0000255}.; TOPO_DOM 299 308 Cytoplasmic. {ECO:0000255}.	TRANSMEM 13 33 Helical. {ECO:0000255}.; TRANSMEM 45 65 Helical. {ECO:0000255}.; TRANSMEM 69 89 Helical. {ECO:0000255}.; TRANSMEM 168 188 Helical. {ECO:0000255}.; TRANSMEM 206 226 Helical. {ECO:0000255}.; TRANSMEM 245 265 Helical. {ECO:0000255}.; TRANSMEM 278 298 Helical. {ECO:0000255}.	integral component of fungal-type vacuolar membrane [GO:0071627]; basic amino acid transmembrane transporter activity [GO:0015174]; basic amino acid transmembrane export from vacuole [GO:0034488]	basic amino acid transmembrane export from vacuole [GO:0034488]	basic amino acid transmembrane transporter activity [GO:0015174]	integral component of fungal-type vacuolar membrane [GO:0071627]	GO:0034488; GO:0015174; GO:0071627		DOMAIN 10 76 PQ-loop 1.; DOMAIN 211 274 PQ-loop 2.					FUNCTION: May function as an amino acid transporter mediating the export of cationic amino acids from the vacuole. {ECO:0000269|PubMed:23169667}.		4 out of 5		34310;			MINT-4501999;
g3690.t1	GK5S-1286	-	3521:6957-8812	GLC	XYL	OK	136.745	22.6223	-2.59567	-4.61983	5e-05	0.00100773	yes	g3690.t1	P48813	GNP1_YEAST	reviewed	High-affinity glutamine permease	GNP1 YDR508C D9719.14	Saccharomyces cerevisiae (strain ATCC 204508 / S288c) (Baker's yeast)	663	GNP1		YDR508C	D9719.14		SUBCELLULAR LOCATION: Mitochondrion membrane {ECO:0000269|PubMed:14576278}; Multi-pass membrane protein {ECO:0000269|PubMed:14576278}.		TOPO_DOM 1 154 Cytoplasmic. {ECO:0000255}.; TOPO_DOM 176 177 Mitochondrial intermembrane. {ECO:0000255}.; TOPO_DOM 199 219 Cytoplasmic. {ECO:0000255}.; TOPO_DOM 241 264 Mitochondrial intermembrane. {ECO:0000255}.; TOPO_DOM 286 289 Cytoplasmic. {ECO:0000255}.; TOPO_DOM 311 342 Mitochondrial intermembrane. {ECO:0000255}.; TOPO_DOM 364 381 Cytoplasmic. {ECO:0000255}.; TOPO_DOM 403 432 Mitochondrial …	TRANSMEM 155 175 Helical. {ECO:0000255}.; TRANSMEM 178 198 Helical. {ECO:0000255}.; TRANSMEM 220 240 Helical. {ECO:0000255}.; TRANSMEM 265 285 Helical. {ECO:0000255}.; TRANSMEM 290 310 Helical. {ECO:0000255}.; TRANSMEM 343 363 Helical. {ECO:0000255}.; TRANSMEM 382 402 Helical. {ECO:0000255}.; TRANSMEM 433 453 Helical. {ECO:0000255}.; TRANSMEM 482 502 Helical. {ECO:0000255}.; TRANSMEM 507 527 Heli…	integral component of membrane [GO:0016021]; mitochondrial membrane [GO:0031966]; plasma membrane [GO:0005886]; amino acid transmembrane transporter activity [GO:0015171]; L-proline transmembrane transporter activity [GO:0015193]; amino acid transport [GO:0006865]; proline transmembrane transport [GO:0035524]; transmembrane transport [GO:0055085]	amino acid transport [GO:0006865]; proline transmembrane transport [GO:0035524]; transmembrane transport [GO:0055085]	amino acid transmembrane transporter activity [GO:0015171]; L-proline transmembrane transporter activity [GO:0015193]	integral component of membrane [GO:0016021]; mitochondrial membrane [GO:0031966]; plasma membrane [GO:0005886]	GO:0015193; GO:0015171; GO:0006865; GO:0016021; GO:0031966; GO:0005886; GO:0035524; GO:0055085							FUNCTION: High affinity transport of glutamine. Also transport Leu, Ser, Thr, Cys, Met and Asn. {ECO:0000269|PubMed:10467005, ECO:0000269|PubMed:10654085, ECO:0000269|PubMed:8660458}.		5 out of 5		32560;	DIP-1616N;	P48813;	MINT-399554;
g2151.t1	GK5S-2852	-	2154:5195-6906	GLC	XYL	OK	310.29	46.6777	-2.73281	-5.09053	5e-05	0.00100773	yes	g2151.t1	P32487	LYP1_YEAST	reviewed	Lysine-specific permease	LYP1 YNL268W N0790	Saccharomyces cerevisiae (strain ATCC 204508 / S288c) (Baker's yeast)	611	LYP1		YNL268W	N0790		SUBCELLULAR LOCATION: Membrane; Multi-pass membrane protein.		TOPO_DOM 1 115 Cytoplasmic. {ECO:0000255}.; TOPO_DOM 137 141 Extracellular. {ECO:0000255}.; TOPO_DOM 163 185 Cytoplasmic. {ECO:0000255}.; TOPO_DOM 206 223 Extracellular. {ECO:0000255}.; TOPO_DOM 244 256 Cytoplasmic. {ECO:0000255}.; TOPO_DOM 275 303 Extracellular. {ECO:0000255}.; TOPO_DOM 322 344 Cytoplasmic. {ECO:0000255}.; TOPO_DOM 366 398 Extracellular. {ECO:0000255}.; TOPO_DOM 419 445 Cytoplas…	TRANSMEM 116 136 Helical. {ECO:0000255}.; TRANSMEM 142 162 Helical. {ECO:0000255}.; TRANSMEM 186 205 Helical. {ECO:0000255}.; TRANSMEM 224 243 Helical. {ECO:0000255}.; TRANSMEM 257 274 Helical. {ECO:0000255}.; TRANSMEM 304 321 Helical. {ECO:0000255}.; TRANSMEM 345 365 Helical. {ECO:0000255}.; TRANSMEM 399 418 Helical. {ECO:0000255}.; TRANSMEM 446 464 Helical. {ECO:0000255}.; TRANSMEM 474 494 Heli…	integral component of membrane [GO:0016021]; plasma membrane [GO:0005886]; basic amino acid transmembrane transporter activity [GO:0015174]; basic amino acid transport [GO:0015802]	basic amino acid transport [GO:0015802]	basic amino acid transmembrane transporter activity [GO:0015174]	integral component of membrane [GO:0016021]; plasma membrane [GO:0005886]	GO:0015174; GO:0015802; GO:0016021; GO:0005886							FUNCTION: High-affinity permease for lysine. {ECO:0000269|PubMed:10654085}.		3 out of 5		35572;		P32487;	MINT-2784512;
g4293.t1	GK5S-667	-	4307:17330-19014	GLC	XYL	OK	157.829	20.3291	-2.95674	-5.14734	5e-05	0.00100773	yes	g4293.t1	Q12235	YCT1_YEAST	reviewed	High affinity cysteine transporter	YCT1 YLL055W L0578	Saccharomyces cerevisiae (strain ATCC 204508 / S288c) (Baker's yeast)	531	YCT1		YLL055W	L0578		SUBCELLULAR LOCATION: Cell membrane; Multi-pass membrane protein. Endoplasmic reticulum membrane; Multi-pass membrane protein.		TOPO_DOM 1 54 Cytoplasmic. {ECO:0000255}.; TOPO_DOM 76 97 Lumenal. {ECO:0000255}.; TOPO_DOM 119 120 Cytoplasmic. {ECO:0000255}.; TOPO_DOM 142 154 Lumenal. {ECO:0000255}.; TOPO_DOM 176 186 Cytoplasmic. {ECO:0000255}.; TOPO_DOM 208 218 Lumenal. {ECO:0000255}.; TOPO_DOM 240 285 Cytoplasmic. {ECO:0000255}.; TOPO_DOM 307 324 Lumenal. {ECO:0000255}.; TOPO_DOM 346 352 Cytoplasmic. {ECO:0000255}.; TOPO_D…	TRANSMEM 55 75 Helical. {ECO:0000255}.; TRANSMEM 98 118 Helical. {ECO:0000255}.; TRANSMEM 121 141 Helical. {ECO:0000255}.; TRANSMEM 155 175 Helical. {ECO:0000255}.; TRANSMEM 187 207 Helical. {ECO:0000255}.; TRANSMEM 219 239 Helical. {ECO:0000255}.; TRANSMEM 286 306 Helical. {ECO:0000255}.; TRANSMEM 325 345 Helical. {ECO:0000255}.; TRANSMEM 353 373 Helical. {ECO:0000255}.; TRANSMEM 379 399 Helical…	endoplasmic reticulum membrane [GO:0005789]; integral component of membrane [GO:0016021]; plasma membrane [GO:0005886]; cysteine transmembrane transporter activity [GO:0033229]; ion transmembrane transporter activity [GO:0015075]; cysteine transmembrane transport [GO:1903712]; cysteine transport [GO:0042883]; ion transmembrane transport [GO:0034220]	cysteine transmembrane transport [GO:1903712]; cysteine transport [GO:0042883]; ion transmembrane transport [GO:0034220]	cysteine transmembrane transporter activity [GO:0033229]; ion transmembrane transporter activity [GO:0015075]	endoplasmic reticulum membrane [GO:0005789]; integral component of membrane [GO:0016021]; plasma membrane [GO:0005886]	GO:1903712; GO:0033229; GO:0042883; GO:0005789; GO:0016021; GO:0034220; GO:0015075; GO:0005886							FUNCTION: High affinity cysteine-specific transporter. Major contributor to cysteine transport when cysteine, at low concentrations, is provided as the sole sulfur source. {ECO:0000269|PubMed:17435223}.		5 out of 5		31260;			MINT-2494190;
g4650.t1	GK5S-318	-	4721:8285-9975	GLC	XYL	OK	108.104	6.07065	-4.15442	-6.09771	5e-05	0.00100773	yes	g4650.t1	P06775	HIP1_YEAST	reviewed	Histidine permease	HIP1 YGR191W G7572	Saccharomyces cerevisiae (strain ATCC 204508 / S288c) (Baker's yeast)	603	HIP1		YGR191W	G7572		SUBCELLULAR LOCATION: Membrane; Multi-pass membrane protein.		TOPO_DOM 1 95 Cytoplasmic. {ECO:0000255}.; TOPO_DOM 117 121 Extracellular. {ECO:0000255}.; TOPO_DOM 143 165 Cytoplasmic. {ECO:0000255}.; TOPO_DOM 186 203 Extracellular. {ECO:0000255}.; TOPO_DOM 224 236 Cytoplasmic. {ECO:0000255}.; TOPO_DOM 256 279 Extracellular. {ECO:0000255}.; TOPO_DOM 298 321 Cytoplasmic. {ECO:0000255}.; TOPO_DOM 343 376 Extracellular. {ECO:0000255}.; TOPO_DOM 397 423 Cytoplasm…	TRANSMEM 96 116 Helical. {ECO:0000255}.; TRANSMEM 122 142 Helical. {ECO:0000255}.; TRANSMEM 166 185 Helical. {ECO:0000255}.; TRANSMEM 204 223 Helical. {ECO:0000255}.; TRANSMEM 237 255 Helical. {ECO:0000255}.; TRANSMEM 280 297 Helical. {ECO:0000255}.; TRANSMEM 322 342 Helical. {ECO:0000255}.; TRANSMEM 377 396 Helical. {ECO:0000255}.; TRANSMEM 424 442 Helical. {ECO:0000255}.; TRANSMEM 452 472 Helic…	integral component of membrane [GO:0016021]; plasma membrane [GO:0005886]; high-affinity L-histidine transmembrane transporter activity [GO:0005291]; histidine transport [GO:0015817]; L-histidine transmembrane transport [GO:0089709]; manganese ion transport [GO:0006828]	histidine transport [GO:0015817]; L-histidine transmembrane transport [GO:0089709]; manganese ion transport [GO:0006828]	high-affinity L-histidine transmembrane transporter activity [GO:0005291]	integral component of membrane [GO:0016021]; plasma membrane [GO:0005886]	GO:0089709; GO:0005291; GO:0015817; GO:0016021; GO:0006828; GO:0005886							FUNCTION: High-affinity permease for histidine.		4 out of 5		33444;	DIP-5549N;	P06775;	MINT-515006;
g4834.t1	GK5S-131	-	4946:16310-17955	GLC	XYL	OK	240.164	9.78629	-4.61711	-7.47635	5e-05	0.00100773	yes	g4834.t1	P53943	AQR1_YEAST	reviewed	Probable transporter AQR1	AQR1 YNL065W N2417 YNL2417W	Saccharomyces cerevisiae (strain ATCC 204508 / S288c) (Baker's yeast)	586	AQR1		YNL065W	N2417 YNL2417W		SUBCELLULAR LOCATION: Membrane {ECO:0000269|PubMed:11922628}; Multi-pass membrane protein {ECO:0000269|PubMed:11922628}.		TOPO_DOM 1 99 Extracellular. {ECO:0000255}.; TOPO_DOM 121 139 Cytoplasmic. {ECO:0000255}.; TOPO_DOM 161 166 Extracellular. {ECO:0000255}.; TOPO_DOM 188 188 Cytoplasmic. {ECO:0000255}.; TOPO_DOM 210 225 Extracellular. {ECO:0000255}.; TOPO_DOM 247 255 Cytoplasmic. {ECO:0000255}.; TOPO_DOM 277 334 Extracellular. {ECO:0000255}.; TOPO_DOM 356 374 Cytoplasmic. {ECO:0000255}.; TOPO_DOM 396 433 Extracell…	TRANSMEM 100 120 Helical. {ECO:0000255}.; TRANSMEM 140 160 Helical. {ECO:0000255}.; TRANSMEM 167 187 Helical. {ECO:0000255}.; TRANSMEM 189 209 Helical. {ECO:0000255}.; TRANSMEM 226 246 Helical. {ECO:0000255}.; TRANSMEM 256 276 Helical. {ECO:0000255}.; TRANSMEM 335 355 Helical. {ECO:0000255}.; TRANSMEM 375 395 Helical. {ECO:0000255}.; TRANSMEM 434 454 Helical. {ECO:0000255}.; TRANSMEM 460 480 Heli…	integral component of membrane [GO:0016021]; plasma membrane [GO:0005886]; drug transmembrane transporter activity [GO:0015238]; monocarboxylic acid transmembrane transporter activity [GO:0008028]; amino acid export [GO:0032973]; drug transmembrane transport [GO:0006855]; monocarboxylic acid transport [GO:0015718]	amino acid export [GO:0032973]; drug transmembrane transport [GO:0006855]; monocarboxylic acid transport [GO:0015718]	drug transmembrane transporter activity [GO:0015238]; monocarboxylic acid transmembrane transporter activity [GO:0008028]	integral component of membrane [GO:0016021]; plasma membrane [GO:0005886]	GO:0032973; GO:0006855; GO:0015238; GO:0016021; GO:0008028; GO:0015718; GO:0005886							FUNCTION: Probable transporter that confers resistance to short-chain monocarboxylic acids and quinidine. {ECO:0000269|PubMed:11922628}.		4 out of 5		35758;		P53943;	MINT-2735094;
[truncated: 91 more columns]

## Sheet: GO_D-xylose metabolic process
test_id	gene_id	gene	locus	sample_1	sample_2	status	value_1	value_2	log2(fold_change)	test_stat	p_value	q_value	significant	gene	Entry	Entry name	Status	Protein names	Gene names	Organism	Length	Gene names (primary )	Gene names (synonym )	Gene names (ordered locus )	Gene names (ORF )	EC number	Subcellular location [CC]	Intramembrane	Topological domain	Transmembrane	Gene ontology (GO)	Gene ontology (biological process)	Gene ontology (molecular function)	Gene ontology (cellular component)	Gene ontology IDs	Domain [CC]	Domain [FT]	Motif	Zinc finger	DNA binding	Pathway	Function [CC]	Enzyme regulation	Annotation	Post-translational modification	Cross-reference (BioGrid)	Cross-reference (DIP)	Cross-reference (IntAct)	Cross-reference (MINT)
g3346.t1	GK5S-1629	-	3162:2009-2997	GLC	XYL	OK	129.277	6324.26	5.61236	10.3779	5e-05	0.00100773	yes	g3346.t1	P49378	XYL1_KLULA	reviewed	NAD(P)H-dependent D-xylose reductase (XR) (EC 1.1.1.307)	XYL1 KLLA0E21714g	Kluyveromyces lactis (strain ATCC 8585 / CBS 2359 / DSM 70799 / NBRC 1267 / NRRL Y-1140 / WM37) (Yeast) (Candida sphaerica)	329	XYL1		KLLA0E21714g		1.1.1.307					oxidoreductase activity [GO:0016491]; D-xylose catabolic process [GO:0042843]	D-xylose catabolic process [GO:0042843]	oxidoreductase activity [GO:0016491]		GO:0042843; GO:0016491						PATHWAY: Carbohydrate metabolism; D-xylose degradation.	FUNCTION: Reduces D-xylose into xylitol.		3 out of 5
g3518.t1	GK5S-1460	-	3320:2870-4680	GLC	XYL	OK	49.2059	557.625	3.50239	6.44511	5e-05	0.00100773	yes	g3518.t1	P42826	XKS1_YEAST	reviewed	Xylulose kinase (Xylulokinase) (EC 2.7.1.17)	XKS1 YGR194C G7584	Saccharomyces cerevisiae (strain ATCC 204508 / S288c) (Baker's yeast)	600	XKS1		YGR194C	G7584	2.7.1.17	SUBCELLULAR LOCATION: Cytoplasm {ECO:0000269|PubMed:14562095}.				cytoplasm [GO:0005737]; ATP binding [GO:0005524]; xylulokinase activity [GO:0004856]; carbohydrate phosphorylation [GO:0046835]; D-xylose metabolic process [GO:0042732]; xylulose catabolic process [GO:0005998]	carbohydrate phosphorylation [GO:0046835]; D-xylose metabolic process [GO:0042732]; xylulose catabolic process [GO:0005998]	ATP binding [GO:0005524]; xylulokinase activity [GO:0004856]	cytoplasm [GO:0005737]	GO:0005524; GO:0042732; GO:0046835; GO:0005737; GO:0004856; GO:0005998									4 out of 5		33447;	DIP-6764N;	P42826;	MINT-667690;
g4433.t1	GK5S-544	-	4395:17990-18915	GLC	XYL	OK	273.409	727.639	1.41216	3.04871	0.0004	0.00579753	yes	g4433.t1	Q12458	YPR1_YEAST	reviewed	Putative reductase 1 (EC 1.1.1.-)	YPR1 YDR368W D9481.8	Saccharomyces cerevisiae (strain ATCC 204508 / S288c) (Baker's yeast)	312	YPR1		YDR368W	D9481.8	1.1.1.-	SUBCELLULAR LOCATION: Cytoplasm.				cytoplasm [GO:0005737]; alditol:NADP+ 1-oxidoreductase activity [GO:0004032]; carbonyl reductase (NADPH) activity [GO:0004090]; arabinose catabolic process [GO:0019568]; cellular response to oxidative stress [GO:0034599]; D-xylose catabolic process [GO:0042843]	arabinose catabolic process [GO:0019568]; cellular response to oxidative stress [GO:0034599]; D-xylose catabolic process [GO:0042843]	alditol:NADP+ 1-oxidoreductase activity [GO:0004032]; carbonyl reductase (NADPH) activity [GO:0004090]	cytoplasm [GO:0005737]	GO:0042843; GO:0004032; GO:0019568; GO:0004090; GO:0034599; GO:0005737									4 out of 5		32427;	DIP-4334N;	Q12458;	MINT-486642;
g4836.t1	GK5S-133	-	4946:22199-23055	GLC	XYL	OK	70.0269	104.788	0.581492	1.12079	0.19225	0.47616	no	g4836.t1	P47137	YJ66_YEAST	reviewed	Uncharacterized oxidoreductase YJR096W (EC 1.-.-.-)	YJR096W J1926	Saccharomyces cerevisiae (strain ATCC 204508 / S288c) (Baker's yeast)	282			YJR096W	J1926	1.-.-.-					alditol:NADP+ 1-oxidoreductase activity [GO:0004032]; aldo-keto reductase (NADP) activity [GO:0004033]; arabinose catabolic process [GO:0019568]; cellular response to oxidative stress [GO:0034599]; D-xylose catabolic process [GO:0042843]	arabinose catabolic process [GO:0019568]; cellular response to oxidative stress [GO:0034599]; D-xylose catabolic process [GO:0042843]	alditol:NADP+ 1-oxidoreductase activity [GO:0004032]; aldo-keto reductase (NADP) activity [GO:0004033]		GO:0042843; GO:0004032; GO:0004033; GO:0019568; GO:0034599									3 out of 5		33851;		P47137;	MINT-2492473;
g3524.t1	GK5S-1455	-	3322:15676-16604	GLC	XYL	OK	674.788	514.58	-0.391038	-0.863248	0.31335	0.615528	no	g3524.t1	Q12458	YPR1_YEAST	reviewed	Putative reductase 1 (EC 1.1.1.-)	YPR1 YDR368W D9481.8	Saccharomyces cerevisiae (strain ATCC 204508 / S288c) (Baker's yeast)	312	YPR1		YDR368W	D9481.8	1.1.1.-	SUBCELLULAR LOCATION: Cytoplasm.				cytoplasm [GO:0005737]; alditol:NADP+ 1-oxidoreductase activity [GO:0004032]; carbonyl reductase (NADPH) activity [GO:0004090]; arabinose catabolic process [GO:0019568]; cellular response to oxidative stress [GO:0034599]; D-xylose catabolic process [GO:0042843]	arabinose catabolic process [GO:0019568]; cellular response to oxidative stress [GO:0034599]; D-xylose catabolic process [GO:0042843]	alditol:NADP+ 1-oxidoreductase activity [GO:0004032]; carbonyl reductase (NADPH) activity [GO:0004090]	cytoplasm [GO:0005737]	GO:0042843; GO:0004032; GO:0019568; GO:0004090; GO:0034599; GO:0005737									4 out of 5		32427;	DIP-4334N;	Q12458;	MINT-486642;
[truncated: 91 more columns]

## Sheet: GO_arabinose metabolic process
test_id	gene_id	gene	locus	sample_1	sample_2	status	value_1	value_2	log2(fold_change)	test_stat	p_value	q_value	significant	gene	Entry	Entry name	Status	Protein names	Gene names	Organism	Length	Gene names (primary )	Gene names (synonym )	Gene names (ordered locus )	Gene names (ORF )	EC number	Subcellular location [CC]	Intramembrane	Topological domain	Transmembrane	Gene ontology (GO)	Gene ontology (biological process)	Gene ontology (molecular function)	Gene ontology (cellular component)	Gene ontology IDs	Domain [CC]	Domain [FT]	Motif	Zinc finger	DNA binding	Pathway	Function [CC]	Enzyme regulation	Annotation	Post-translational modification	Cross-reference (BioGrid)	Cross-reference (DIP)	Cross-reference (IntAct)	Cross-reference (MINT)
g3211.t1	GK5S-1779	-	3053:31864-32852	GLC	XYL	OK	23.6887	332.992	3.81322	6.41061	5e-05	0.00100773	yes	g3211.t1	P38115	ARA1_YEAST	reviewed	D-arabinose dehydrogenase [NAD(P)+] heavy chain (EC 1.1.1.117) (AKR3C)	ARA1 YBR149W YBR1127	Saccharomyces cerevisiae (strain ATCC 204508 / S288c) (Baker's yeast)	344	ARA1		YBR149W	YBR1127	1.1.1.117	SUBCELLULAR LOCATION: Cytoplasm.				cytosol [GO:0005829]; D-arabinose 1-dehydrogenase [NAD(P)+] activity [GO:0045290]; cellular carbohydrate metabolic process [GO:0044262]	cellular carbohydrate metabolic process [GO:0044262]	D-arabinose 1-dehydrogenase [NAD(P)+] activity [GO:0045290]	cytosol [GO:0005829]	GO:0045290; GO:0044262; GO:0005829							FUNCTION: Catalyzes the oxidation of D-arabinose, L-xylose, L-fucose and L-galactose in the presence of NADP(+).		5 out of 5		32848;	DIP-4926N;		MINT-521486;
g4433.t1	GK5S-544	-	4395:17990-18915	GLC	XYL	OK	273.409	727.639	1.41216	3.04871	0.0004	0.00579753	yes	g4433.t1	Q12458	YPR1_YEAST	reviewed	Putative reductase 1 (EC 1.1.1.-)	YPR1 YDR368W D9481.8	Saccharomyces cerevisiae (strain ATCC 204508 / S288c) (Baker's yeast)	312	YPR1		YDR368W	D9481.8	1.1.1.-	SUBCELLULAR LOCATION: Cytoplasm.				cytoplasm [GO:0005737]; alditol:NADP+ 1-oxidoreductase activity [GO:0004032]; carbonyl reductase (NADPH) activity [GO:0004090]; arabinose catabolic process [GO:0019568]; cellular response to oxidative stress [GO:0034599]; D-xylose catabolic process [GO:0042843]	arabinose catabolic process [GO:0019568]; cellular response to oxidative stress [GO:0034599]; D-xylose catabolic process [GO:0042843]	alditol:NADP+ 1-oxidoreductase activity [GO:0004032]; carbonyl reductase (NADPH) activity [GO:0004090]	cytoplasm [GO:0005737]	GO:0042843; GO:0004032; GO:0019568; GO:0004090; GO:0034599; GO:0005737									4 out of 5		32427;	DIP-4334N;	Q12458;	MINT-486642;
g4836.t1	GK5S-133	-	4946:22199-23055	GLC	XYL	OK	70.0269	104.788	0.581492	1.12079	0.19225	0.47616	no	g4836.t1	P47137	YJ66_YEAST	reviewed	Uncharacterized oxidoreductase YJR096W (EC 1.-.-.-)	YJR096W J1926	Saccharomyces cerevisiae (strain ATCC 204508 / S288c) (Baker's yeast)	282			YJR096W	J1926	1.-.-.-					alditol:NADP+ 1-oxidoreductase activity [GO:0004032]; aldo-keto reductase (NADP) activity [GO:0004033]; arabinose catabolic process [GO:0019568]; cellular response to oxidative stress [GO:0034599]; D-xylose catabolic process [GO:0042843]	arabinose catabolic process [GO:0019568]; cellular response to oxidative stress [GO:0034599]; D-xylose catabolic process [GO:0042843]	alditol:NADP+ 1-oxidoreductase activity [GO:0004032]; aldo-keto reductase (NADP) activity [GO:0004033]		GO:0042843; GO:0004032; GO:0004033; GO:0019568; GO:0034599									3 out of 5		33851;		P47137;	MINT-2492473;
g3030.t1	GK5S-1952	-	2921:5011-6020	GLC	XYL	OK	44.5269	58.315	0.389189	0.696395	0.4057	0.683836	no	g3030.t1	Q04212	ARA2_YEAST	reviewed	D-arabinose 1-dehydrogenase (EC 1.1.1.116) (NAD(+)-specific D-arabinose dehydrogenase)	ARA2 YMR041C YM9532.06C	Saccharomyces cerevisiae (strain ATCC 204508 / S288c) (Baker's yeast)	335	ARA2		YMR041C	YM9532.06C	1.1.1.116					D-arabinose 1-dehydrogenase (NAD) activity [GO:0047816]; D-arabinose 1-dehydrogenase [NAD(P)+] activity [GO:0045290]; dehydro-D-arabinono-1,4-lactone biosynthetic process [GO:0070485]	dehydro-D-arabinono-1,4-lactone biosynthetic process [GO:0070485]	D-arabinose 1-dehydrogenase (NAD) activity [GO:0047816]; D-arabinose 1-dehydrogenase [NAD(P)+] activity [GO:0045290]		GO:0047816; GO:0045290; GO:0070485									3 out of 5		35213;	DIP-4506N;	Q04212;	MINT-573097;
g3524.t1	GK5S-1455	-	3322:15676-16604	GLC	XYL	OK	674.788	514.58	-0.391038	-0.863248	0.31335	0.615528	no	g3524.t1	Q12458	YPR1_YEAST	reviewed	Putative reductase 1 (EC 1.1.1.-)	YPR1 YDR368W D9481.8	Saccharomyces cerevisiae (strain ATCC 204508 / S288c) (Baker's yeast)	312	YPR1		YDR368W	D9481.8	1.1.1.-	SUBCELLULAR LOCATION: Cytoplasm.				cytoplasm [GO:0005737]; alditol:NADP+ 1-oxidoreductase activity [GO:0004032]; carbonyl reductase (NADPH) activity [GO:0004090]; arabinose catabolic process [GO:0019568]; cellular response to oxidative stress [GO:0034599]; D-xylose catabolic process [GO:0042843]	arabinose catabolic process [GO:0019568]; cellular response to oxidative stress [GO:0034599]; D-xylose catabolic process [GO:0042843]	alditol:NADP+ 1-oxidoreductase activity [GO:0004032]; carbonyl reductase (NADPH) activity [GO:0004090]	cytoplasm [GO:0005737]	GO:0042843; GO:0004032; GO:0019568; GO:0004090; GO:0034599; GO:0005737									4 out of 5		32427;	DIP-4334N;	Q12458;	MINT-486642;
*A text search in the UniProt annotation list was required to find proteins ARA1 and ARA2, which was not picked up by GO terms. It is important to combine a variety of functionalities.
[truncated: 91 more columns]
